# Supplementary material for: Porphyromonas gingivalis induces entero-hepatic metabolic derangements with alteration of gut microbiota in a type 2 diabetes mouse model
Source: Research Square preprint supplement (doi:10.21203/rs.3.rs-279204/v1), 2021-03-11
Supplement: Supplementary file 1 [file 5ddd01ef7bd883f6db77363a.xlsx]

## Sheet: Table S5
	Table S5. Hydrophilic metabolite profiles of small intestines in Pg-treated db/db mice
				Relative peak area (peak area/IS/mg-small intestine weight)
				Control (CMC)				Pg
	Compound name	Analytical method	KEGG ID	1	2	3	Mean	1	2	3	Mean
	2-Aminoadipic acid-3TMS	GC/MS/MS	C00956	0	0	0	0	0	0.492392	1.10269	0.531693
	2-Aminoethanol-3TMS	GC/MS/MS	C00189	271.148	228.73	101.272	200.383	143.813	129.888	191.393	155.031
	2-Aminopimelic acid-3TMS	GC/MS/MS	-	5.36634	5.59465	6.90697	5.95599	6.20236	5.85883	9.32221	7.1278
	2-Hydroxybutyric acid-2TMS	GC/MS/MS	C05984	1.28082	1.8328	1.07062	1.39474	2.08575	1.0402	1.98516	1.7037
	2-Hydroxyglutaric acid-3TMS	GC/MS/MS	C02630	1.88246	2.34096	2.05171	2.09171	2.25338	2.10889	2.50516	2.28914
	2-Ketoglutaric acid-meto-2TMS	GC/MS/MS	C00026	0	1.57994	0	0.526648	0	0	0	0
	3-Aminopropanoic acid-3TMS	GC/MS/MS	C00099	5.4471	4.80182	4.13108	4.79333	5.25443	4.49882	6.34367	5.36564
	3-Hydroxybutyric acid-2TMS	GC/MS/MS	C01089	4.4239	11.1909	13.9559	9.8569	26.7379	24.2056	16.9992	22.6476
	3-Hydroxyisobutyric acid-2TMS	GC/MS/MS	C01188	1.49805	4.0302	4.44696	3.32507	9.1411	7.08665	6.55906	7.5956
	4-Aminobutyric acid-3TMS	GC/MS/MS	C00334	25.907	29.0075	13.4479	22.7875	37.3254	34.5648	56.2612	42.7171
	4-Hydroxyproline-3TMS	GC/MS/MS	C01157	17.7707	32.6046	18.0229	22.7994	13.4684	12.7705	21.3835	15.8741
	5-Aminovaleric acid-3TMS	GC/MS/MS	C00431	2.5794	3.0408	2.62087	2.74702	1.3544	1.71704	4.0756	2.38235
	5-Oxoproline-2TMS	GC/MS/MS	C01879	1054.74	1047.89	815.679	972.77	454.633	487.381	719.811	553.941
	Adenine-2TMS	GC/MS/MS	C00147	5.2872	5.31569	7.89535	6.16608	6.7327	4.34762	3.96952	5.01661
	Adenosine-4TMS	GC/MS/MS	C00212	2.26606	2.59137	3.17837	2.6786	2.0368	1.69487	2.09446	1.94204
	Alanine-2TMS	GC/MS/MS	C00041	2824.11	3186.77	1881.53	2630.8	1161.09	1435.69	1874.16	1490.31
	Allantoin-3TMS	GC/MS/MS	C01551	4.33264	4.47474	6.97684	5.26141	0.650499	2.27039	1.67895	1.53328
	Arabinose-meto-4TMS	GC/MS/MS	C00216	2.57294	3.38664	2.6427	2.86743	1.06513	1.3901	1.24173	1.23232
	Arabitol-5TMS	GC/MS/MS	C01904	2.95734	3.56038	4.04375	3.52049	0.460615	1.10274	1.23691	0.93342
	Arginine-3TMS	GC/MS/MS	C00062	4.53292	6.11341	5.3822	5.34284	0	1.18111	1.40247	0.861193
	Aspargine-3TMS	GC/MS/MS	C00152	19.6386	25.7905	10.5926	18.6739	0.96351	4.71651	4.4863	3.38877
	Aspartic acid-3TMS	GC/MS/MS	C00049	809.999	982.684	459.137	750.607	338.149	424.039	660.065	474.084
	Benzoic acid-TMS	GC/MS/MS	C00180	2.71265	3.0718	2.89089	2.89178	2.78594	3.18947	2.88451	2.95331
	Cadaverine-4TMS	GC/MS/MS	C01672	1.1726	0.959222	4.69878	2.27687	0.700937	0.811418	0.6502	0.720851
	Citric acid-4TMS	GC/MS/MS	C00158	7.79068	9.04736	10.2862	9.04142	10.1083	8.12526	13.4509	10.5615
	Creatinine-3TMS	GC/MS/MS	C00791	16.2767	13.5735	9.24472	13.0316	13.1813	17.3248	14.2602	14.9221
	Cystamine-nTMS	GC/MS/MS	-	30.0063	24.2987	15.6561	23.3203	24.1248	32.296	32.0712	29.4973
	Cysteine-3TMS	GC/MS/MS	C00097	124.475	113.628	162.261	133.455	73.9737	84.3977	74.0738	77.4817
	Cystine-4TMS	GC/MS/MS	C00491	3.78268	4.71536	2.62887	3.70897	0	3.27259	0.630107	1.3009
	Cytosine-2TMS	GC/MS/MS	C00380	13.9614	8.81245	9.65666	10.8102	0.792911	0.446478	0.641359	0.626916
	Dihydrouracil-2TMS	GC/MS/MS	C00429	1.15483	1.03426	1.03132	1.07347	0.791428	1.37664	1.18386	1.11731
	Dihydroxyacetone-meto-2TMS	GC/MS/MS	C00184	5.39945	4.83118	3.1478	4.45948	1.28097	1.2571	1.1911	1.24306
	Fructose-meto-5TMS	GC/MS/MS	C00095	45.0062	33.7971	60.8702	46.5578	25.7715	20.91	21.2356	22.639
	Fumaric acid-2TMS	GC/MS/MS	C00122	12.1169	14.8247	13.862	13.6012	18.3972	13.6223	17.4766	16.4987
	Galactose-meto-5TMS	GC/MS/MS	C00124	26.5482	26.16	0	17.5694	0	0	7.29928	2.43309
	Galacturonic acid-meto-5TMS	GC/MS/MS	C00333	4.23735	5.13706	7.53945	5.63795	1.07032	1.44789	1.80111	1.43977
	Gluconic acid-6TMS	GC/MS/MS	C00257	22.3707	30.7799	36.2161	29.7889	5.62307	9.07917	7.82571	7.50932
	Glucose-meto-5TMS(1)	GC/MS/MS	C00031	763.949	763.538	6019.49	2515.66	2935.69	1752.75	943.335	1877.26
	Glucuronic acid-meto-5TMS	GC/MS/MS	C00191	33.7106	26.2293	16.2878	25.4093	27.8572	17.571	13.479	19.6357
	Glutamic acid-3TMS	GC/MS/MS	C00302	608.284	676.219	391.68	558.728	116.028	286.776	328.373	243.726
	Glutamine-3TMS	GC/MS/MS	C00064	7.94412	13.2252	8.36479	9.8447	1.33141	5.13845	5.22973	3.89986
	Glyceraldehyde-meto-2TMS	GC/MS/MS	C00577	0	0	0.672502	0.224167	0	0	0	0
	Glyceric acid-3TMS	GC/MS/MS	C00258	10.7206	12.0262	8.10059	10.2824	8.45352	6.64729	15.7326	10.2778
	Glycerol-3TMS	GC/MS/MS	C00116	46.2072	69.6323	51.3124	55.7173	52.9181	58.1084	55.2794	55.4353
	Glycine-3TMS	GC/MS/MS	C00037	1704.74	1987.12	1396.77	1696.21	1544.97	1566.37	2292.01	1801.12
	Glycolic acid-2TMS	GC/MS/MS	C00160	5.01505	5.97067	4.85963	5.28178	6.12077	5.92137	6.97458	6.33891
	Glyoxylic acid-meto-TMS	GC/MS/MS	C00048	0.58953	0.855633	0.440329	0.628497	0	0.4916	0.803708	0.43177
	Histidine-3TMS	GC/MS/MS	C00135	41.2292	83.4744	43.1813	55.9616	0.69797	5.61184	8.20988	4.8399
	Hypotaurine-3TMS	GC/MS/MS	C00519	14.4871	18.107	12.2011	14.9317	20.3887	16.9622	19.2134	18.8548
	Hypoxanthine-2TMS	GC/MS/MS	C00262	78.5384	65.2051	43.9746	62.5727	94.9142	111.768	0.493477	69.0586
	Inosine-4TMS	GC/MS/MS	C00294	16.9276	16.3345	17.1088	16.7903	20.115	18.7901	14.2473	17.7175
	Inositol-6TMS(2)	GC/MS/MS	C00137	368.975	290.418	104.232	254.541	196.549	178.695	235.075	203.44
	Isoleucine-2TMS	GC/MS/MS	C00407	1370.44	1476.27	891.61	1246.11	303.688	514.166	553.287	457.047
	Lactitol-9TMS	GC/MS/MS	D08266	0	0	391.796	130.599	0	0	0	0
	Lactose-meto-8TMS(1)	GC/MS/MS	C00243	24.4905	46.8151	56.0848	42.4635	3.35411	8.50207	10.232	7.36273
	Leucine-2TMS	GC/MS/MS	C00123	4097.61	4407.69	2591.32	3698.87	775.183	1380.93	1428.93	1195.01
	Lysine-4TMS	GC/MS/MS	C00047	438.92	584.75	405.271	476.314	21.4984	73.9894	54.4979	49.9952
	Malic acid-3TMS	GC/MS/MS	C00149	10.4573	11.5164	12.1232	11.3656	16.62	9.76947	13.7852	13.3916
	Malonic acid-2TMS	GC/MS/MS	C00383	1.24124	5.07915	5.43824	3.91954	0	1.22702	0.904172	0.710398
	Mannitol-6TMS	GC/MS/MS	C00392	191.721	228.991	53.0279	157.913	20.2693	45.0911	25.3891	30.2498
	Mannose-meto-5TMS(1)	GC/MS/MS	C00159	61.0535	50.6887	47.2236	52.9886	97.8952	78.0505	53.2818	76.4092
	meso-Erythritol-4TMS	GC/MS/MS	C00503	0	0.87684	0	0.29228	0	0	0	0
	Methionine-2TMS	GC/MS/MS	C00073	51.042	51.9978	31.0501	44.6966	9.12108	18.8178	19.8813	15.9401
	N-Acetylglutamine-3TMS	GC/MS/MS	-	3.72938	4.40541	3.63253	3.92244	1.49904	0.809834	0.533662	0.947512
	N-Acetylmannosamine-meto-4TMS	GC/MS/MS	C00645	5.35584	4.81242	3.19802	4.45543	3.96085	3.11268	5.25304	4.10885
	N-Acetylserine-2TMS	GC/MS/MS	-	2.35731	1.97065	0.986919	1.77163	0.537014	0	1.10188	0.546299
	Niacinamide-TMS	GC/MS/MS	C00153	16.6554	13.0931	12.9347	14.2277	23.3208	16.9772	16.9341	19.0774
	Nicotinic acid-TMS	GC/MS/MS	C00253	6.8006	7.67133	1.17615	5.21603	0.936807	3.22113	7.94787	4.03527
	Octopamine-4TMS	GC/MS/MS	C04227	19.6572	20.5629	23.7072	21.3091	6.04141	9.91117	4.40995	6.78751
	O-Phosphoethanolamine-4TMS	GC/MS/MS	C00346	11.7486	12.4886	15.5593	13.2655	26.3344	20.5768	27.6516	24.8543
	Ornithine-4TMS	GC/MS/MS	C00077	30.7355	42.8379	37.8574	37.1436	11.3062	19.8065	24.3355	18.4827
	Palmitic acid-TMS	GC/MS/MS	C00249	4.76646	19.6711	13.678	12.7052	0.856413	2.68091	0.601808	1.37971
	Phenylalanine-2TMS	GC/MS/MS	C00079	629.041	657.493	461.569	582.701	57.1727	172.778	156.046	128.666
	Phosphoric acid-3TMS	GC/MS/MS	C00009	752.144	683.012	973.024	802.727	1505.12	1318.16	1061.6	1294.96
	Proline-2TMS	GC/MS/MS	C00148	746.463	924.307	669.704	780.158	358.358	527.49	662.861	516.236
	Putrescine-4TMS	GC/MS/MS	C00134	3.38374	1.01142	10.7491	5.04809	3.45276	3.40637	0	2.28638
	Pyruvic acid-meto-TMS	GC/MS/MS	C00022	1.25093	1.97473	2.59903	1.94156	0.498444	0.476559	0.77156	0.582188
	Ribonolactone-3TMS	GC/MS/MS	-	0	1.02937	0.499282	0.50955	0	0	0.720123	0.240041
	Ribose-meto-4TMS	GC/MS/MS	C00121	131.41	100.098	41.5692	91.0255	45.2434	42.6917	39.2547	42.3966
	Ribulose-meto-4TMS	GC/MS/MS	C05052	9.78701	10.5311	4.30722	8.20843	7.34537	6.7692	4.22429	6.11295
	Serine-3TMS	GC/MS/MS	C00065	1634.45	1853.95	928.71	1472.37	531.294	862.993	1139.47	844.584
	Spermine-6TMS	GC/MS/MS	C00750	39.4662	37.4733	48.3845	41.7747	0	8.79181	3.65768	4.14983
	Succinic acid-2TMS	GC/MS/MS	C00042	2.29998	0.771619	6.17261	3.0814	0	0	0	0
	Sucrose-8TMS	GC/MS/MS	C00089	7.46361	10.9112	73.4483	30.6077	1.31583	2.20151	2.84352	2.12029
	Taurine-3TMS	GC/MS/MS	C00245	439.35	371.451	278.03	362.944	498.112	365.658	403.103	422.291
	Threitol-4TMS	GC/MS/MS	C16884	0	1.86706	1.94254	1.26987	0	0	0	0
	Threonic acid-4TMS	GC/MS/MS	C01620	3.99023	6.73168	6.2483	5.65674	2.81487	2.83561	4.48871	3.37973
	Threonine-3TMS	GC/MS/MS	C00188	408.346	470.181	235.538	371.355	132.105	188.833	244.676	188.538
	Trehalose-8TMS	GC/MS/MS	C01083	5.94941	7.40542	26.1242	13.1597	2.34684	2.87519	1.54714	2.25639
	Tryptophan-3TMS	GC/MS/MS	C00078	250.671	333.955	231.362	271.996	6.10668	45.8154	24.1571	25.3597
	Tyramine-3TMS	GC/MS/MS	C00483	5.42852	3.12644	5.32034	4.6251	0	0.752837	0	0.250946
	Tyrosine-3TMS	GC/MS/MS	C00082	1920.76	2072.94	1698.83	1897.51	79.7799	331.016	197.476	202.757
	Uracil-2TMS	GC/MS/MS	C00106	65.5856	61.1472	43.9259	56.8862	89.1888	71.932	74.9731	78.698
	Urea-2TMS	GC/MS/MS	C00086	454.062	410.991	546.05	470.368	817.045	551.344	742.409	703.6
	Uric acid-4TMS	GC/MS/MS	C00366	18.3974	20.5164	7.59913	15.5043	7.8453	6.04803	13.5971	9.16349
	Uridine-3TMS	GC/MS/MS	C00299	12.0216	11.8541	18.6357	14.1705	23.7139	14.7662	6.75356	15.0779
	Valine-2TMS	GC/MS/MS	C00183	1705.74	1816.66	1071.48	1531.29	525.878	772.668	871.862	723.469
	Xanthine-3TMS	GC/MS/MS	C00385	108.665	92.8782	73.1819	91.575	117.801	100.484	104.067	107.451
	Xylitol-5TMS	GC/MS/MS	C00379	1.49805	2.24226	2.06117	1.93383	1.4575	1.11778	0.651807	1.0757
	Xylose-meto-4TMS	GC/MS/MS	C00181	0.531385	0.728389	0	0.419925	0	0	0	0
	2-Oxoglutarate	Ion-paring LC/MS/MS	C00026	4.14816	11.1333	7.20848	7.49665	0	0	2.46595	0.821983
	3-Phosphoglyceric acid(3-PA)	Ion-paring LC/MS/MS	C00197	1.19573	0.584562	1.6506	1.14363	2.79952	5.73027	11.6608	6.73021
	6-Phosphogluconate(6-PG)	Ion-paring LC/MS/MS	C00345	0.670351	1.92258	1.65145	1.41479	4.55835	3.61214	7.72114	5.29721
	ADP	Ion-paring LC/MS/MS	C00008	19.1651	19.7182	22.6367	20.5067	60.7227	49.1196	38.5142	49.4522
	ADP-Ribose(ADP-Rib)	Ion-paring LC/MS/MS	C00301	0.160749	0	0.263281	0.141344	0.0775663	0.0773182	0.0425765	0.0658203
	AMP	Ion-paring LC/MS/MS	C00020	12.5024	9.51276	13.8737	11.963	50.6274	25.1537	25.8338	33.8716
	Arginine	Ion-paring LC/MS/MS	C00062	320.459	335.745	208.239	288.148	41.156	117.727	112.51	90.4644
	ATP	Ion-paring LC/MS/MS	C00002	0	0	1.5892	0.529732	10.1037	6.86313	12.5217	9.82952
	cAMP	Ion-paring LC/MS/MS	C00575	1.14192	0.811652	1.71509	1.22289	1.64473	1.21095	1.60734	1.48767
	CMP	Ion-paring LC/MS/MS	C00055	3.359	1.10428	8.16697	4.21008	26.5583	8.51002	4.11203	13.0601
	Cytidine	Ion-paring LC/MS/MS	C00475	4.96916	3.51511	2.00171	3.49533	2.37583	1.23831	2.45858	2.02424
	FAD	Ion-paring LC/MS/MS	C00016	0.269647	0.264632	0.236656	0.256978	0.948974	0.280292	0.511836	0.580367
	Fructose-1,6-bisphosphate(F1,6BP)	Ion-paring LC/MS/MS	C05378	0	0	1.00553	0.335175	2.74511	5.93985	11.8684	6.85112
	Fructose-6-phosphate(F6P)	Ion-paring LC/MS/MS	C05345	9.90684	16.0681	46.4336	24.1362	33.9078	24.5154	41.6256	33.3496
	GDP	Ion-paring LC/MS/MS	C00035	0.9396	0.694866	1.73091	1.12179	7.56253	5.03168	5.75847	6.11756
	Glucose-1-phosphate(G1P)	Ion-paring LC/MS/MS	C00103	14.6007	14.5157	17.4479	15.5214	21.0584	19.851	45.385	28.7648
	Glucose-6-phosphate(G6P)	Ion-paring LC/MS/MS	C00668	100.917	97.8136	137.018	111.916	45.1915	73.2081	128.817	82.4056
	Glycerate	Ion-paring LC/MS/MS	C00258	16.5404	17.1778	13.8113	15.8432	16.2277	11.5924	30.9821	19.6007
	GMP	Ion-paring LC/MS/MS	C00144	0.857062	0.338828	1.62569	0.940527	11.0309	5.12756	2.33383	6.16409
	Guanine	Ion-paring LC/MS/MS	C00242	0.248461	0.299881	0.391024	0.313122	0.187524	0.103508	0.438049	0.243027
	Guanosine	Ion-paring LC/MS/MS	C00387	6.68088	7.32656	14.9411	9.64951	17.6094	10.8718	11.5342	13.3385
	Inosin	Ion-paring LC/MS/MS	C00294	201.992	211.73	241.269	218.33	430.42	308.509	269.867	336.265
	Lactate	Ion-paring LC/MS/MS	C00186	255.897	350.698	131.897	246.164	406.191	276.481	394.116	358.929
	NAD	Ion-paring LC/MS/MS	C00003	0.527393	0.433993	0.510044	0.490477	1.35905	0.826407	0.847134	1.01086
	NADP	Ion-paring LC/MS/MS	C00006	1.05685	1.06709	1.10446	1.07613	2.05612	2.22244	2.96728	2.41528
	NADPH	Ion-paring LC/MS/MS	C00005	0.102021	0.0122421	0.0110288	0.0417639	0.000211616	0.0203207	0	0.0068441
	Orotate	Ion-paring LC/MS/MS	C00295	30.0715	27.7306	23.9151	27.2391	75.7469	48.342	55.7743	59.9544
	Pantothenate	Ion-paring LC/MS/MS	C00864	41.4308	35.9832	40.4193	39.2778	38.034	27.3372	32.362	32.5777
	Phosphoenolpyruvate(PEP)	Ion-paring LC/MS/MS	C00074	0	0.118478	0.369799	0.162759	0.40051	0.67669	3.19104	1.42275
	Ribulose-1,5-bisphosphate(RuBP)	Ion-paring LC/MS/MS	C01182	0	0.0951473	0.00719973	0.0341157	0.30289	0.449591	0.513118	0.421867
	Sedoheptulose-7-phosphate(S7P)	Ion-paring LC/MS/MS	C05382	30.8	0	26.8703	19.2234	34.49	25.4345	63.5178	41.1474
	Shikimate	Ion-paring LC/MS/MS	C00493	1.31066	2.31518	1.64622	1.75735	0	0.366825	0.7202	0.362342
	Thymidine	Ion-paring LC/MS/MS	C00214	4.35401	4.05245	2.96795	3.79147	0.0951504	0.42222	0.0569779	0.191449
	Thymine	Ion-paring LC/MS/MS	C00178	22.8114	19.1194	4.70359	15.5448	1.59027	3.05768	2.63076	2.42624
	UMP	Ion-paring LC/MS/MS	C00105	0.738138	0.564293	3.18227	1.4949	13.0383	4.46254	2.33292	6.61124
	α-Glycerophosphate	Ion-paring LC/MS/MS	C00093	339.585	624.087	75.6608	346.445	36.2558	47.1881	124.505	69.3162

## Sheet: Table S6
	Table S6. Hydrophilic metabolite profiles of livers in Pg-treated db/db mice
	Compound name	Abbreviation	Molecular formula	Exact mass	KEGG ID	HMDB ID	Method	Precursor ion (adduct)	Relative peak area (peak area/IS/mg-liver weight)
									Control (CMC)				Pg
									1	2	3	Mean	1	2	3	Mean
	Hippuric acid	Hippuric acid	C9H9NO3	179.058	C01586	HMDB00714	IC/MS/MS	(M‒H)‒	0.00514971	0.0121961	0.0120438	0.00979652	0.0235576	0.0568952	0.0189709	0.0331412
	6-Phosphogluconic acid	6PG	C6H13O10P	276.025	C00345	HMDB01316	IC/MS/MS	(M‒H)‒	0.00175913	0.00219742	0.00159719	0.00185125	0.0069228	0.00458212	0.00640624	0.00597038
	Uric acid	Uric acid	C5H4N4O3	168.028	C00366	HMDB00289	IC/MS/MS	(M‒H)‒	0.0589857	0.135	0.0675244	0.0871699	0.278578	0.209512	0.22159	0.23656
	Thiodiacetic acid	Thiodiacetic acid	C4H6O4S	149.999	C14872	HMDB42032	IC/MS/MS	(M‒H)‒	0.00041473	0.000601814	0.000544057	0.0005202	0.0011338	0.00162294	0.00118557	0.0013141
	Phosphoenolpyruvic acid	PEP	C3H5O6P	167.982	C00074	HMDB00263	IC/MS/MS	(M‒H)‒	0.0311697	0.0221294	0.0201824	0.0244938	0.0659229	0.0451566	0.0658314	0.0589703
	DL-Beta-Phenyllactic acid	Phenyllactic acid	C9H10O3	166.063	－	HMDB00779	IC/MS/MS	(M‒H)‒	0.00102483	0.00147751	0.00176051	0.00142095	0.00279074	0.00507852	0.00195298	0.00327408
	Adenylosuccinic acid	Succinyl AMP	C14H18N5O11P	463.074	C03794	HMDB00536	IC/MS/MS	(M‒H)‒	0.00332511	0.0028513	0.00252467	0.00290036	0.00577828	0.00490566	0.00874911	0.00647768
	N-Acetyl-D-glucosamine 1-phosphate	N-Acetyl-glucosamine-1P	C8H16NO9P	301.056	C04256	HMDB01367	IC/MS/MS	(M‒H)‒	0.0615986	0.044973	0.05081	0.0524605	0.111299	0.124943	0.108509	0.114917
	D-Galactose 1-phosphate	Ga1P	C6H13O9P	260.03	C03384	HMDB00645	IC/MS/MS	(M‒H)‒	0.0607418	0.0411534	0.0433036	0.0483996	0.109968	0.1118	0.0922526	0.104674
	DL-4-Hydroxyphenyllactic acid	4-Hydroxyphenyllactic acid	C9H10O4	182.058	－	HMDB00755	IC/MS/MS	(M‒H)‒	0.0170539	0.0243571	0.0376936	0.0263682	0.048767	0.0726639	0.0441252	0.0551854
	Tricarballylic acid	Tricarballylic acid	C6H8O6	176.032	－	HMDB31193	IC/MS/MS	(M‒H)‒	0.00283311	0.00192032	0.00208857	0.00228067	0.00342578	0.00598317	0.00505076	0.00481991
	D-Glucuronic acid	Glucuronic acid	C6H10O7	194.043	C00191	HMDB00127	IC/MS/MS	(M‒H)‒	0.169153	0.159637	0.281276	0.203355	0.600502	0.210206	0.390723	0.400477
	Phospho-D-glyceric acid	PGA	C3H7O7P	185.993	C00631	HMDB03391	IC/MS/MS	(M‒H)‒	0.0821754	0.0655611	0.062262	0.0699995	0.16871	0.0971406	0.150913	0.138921
	2-Dehydro-D-gluconate	2-Dehydrogluconate	C6H10O7	194.043	C06473	HMDB11732	IC/MS/MS	(M‒H)‒	0.0709682	0.0641863	0.0819436	0.072366	0.19489	0.0998516	0.120719	0.138487
	Isovalerylglycine	IsovalerylGly	C7H13NO3	159.089	－	HMDB00678	IC/MS/MS	(M‒H)‒	0.00998774	0.0129023	0.0155421	0.0128107	0.0208715	0.0459905	0.00758844	0.0248168
	5-aminoimidazole-4-carboxamide-1-β-D-ribofuranosyl 5'-monophosphate	AICARP	C9H15N4O8P	338.063	－	－	IC/MS/MS	(M‒H)‒	0.00277879	0.00303553	0.00180384	0.00253939	0.00437936	0.00510843	0.00496921	0.004819
	2-Hydroxy glutaric acid	2-Hydroxy glutaric acid	C5H8O5	148.037	－	HMDB00606	IC/MS/MS	(M‒H)‒	0.188952	0.154645	0.12986	0.157819	0.167293	0.244447	0.489396	0.300379
	L-Cysteic acid	Cysteic acid	C3H7NO5S	169.005	C00506	HMDB02757	IC/MS/MS	(M‒H)‒	0.0255819	0.0301059	0.0128715	0.0228531	0.039195	0.0473629	0.0314141	0.039324
	Glyoxylic acid	Glyoxylic acid	C2H2O3	74.0004	C00048	HMDB00119	IC/MS/MS	(M‒H)‒	0.00156321	0.00176016	0.00198624	0.00176987	0.00369347	0.00325872	0.00184206	0.00293142
	Nicotinamide adenine dinucleotide	NAD	C21H27N7O14P2	663.109	C00003	HMDB00902	IC/MS/MS	(M‒H)‒	0.000630256	0.000454403	0.000433295	0.000505985	0.000723305	0.00105139	0.000841253	0.000871984
	D-Sedoheputulose 7-phosphate	S7P	C7H15O10P	290.04	C05382	HMDB01068	IC/MS/MS	(M‒H)‒	0.0272451	0.0227713	0.0214868	0.0238344	0.0383978	0.038344	0.0434043	0.0400487
	Allantoin	Allantoin	C4H6N4O3	158.044	C01551	HMDB00462	IC/MS/MS	(M‒H)‒	0.315796	0.489172	0.324443	0.37647	0.607764	0.659309	0.544529	0.603867
	L-threo-3-Hydroxyasparate	3-Hydroxy-Asp	C4H7NO5	149.032	C11511	－	IC/MS/MS	(M‒H)‒	0.000447225	0.000665524	0.000418564	0.000510438	0.000891716	0.000714773	0.00081214	0.000806209
	O-Phospho-L-serine	O-Phospho-Ser	C3H8NO6P	185.009	C01005	HMDB01721	IC/MS/MS	(M‒H)‒	0.000458491	0.000394933	0.000390672	0.000414699	0.000800641	0.000435178	0.000748951	0.00066159
	3-Hydroxy-3-methylglutaric acid	3-Hydroxymethylglutaric acid	C6H10O5	162.053	C03761	HMDB00355	IC/MS/MS	(M‒H)‒	0.018211	0.025261	0.0189048	0.0207923	0.0233073	0.0535646	0.0233469	0.0334063
	2'-Deoxyuridine	Deoxyuridine	C9H12N2O5	228.075	C00526	HMDB00012	IC/MS/MS	(M‒H)‒	0.000648082	0.000520614	0.000517194	0.000561963	0.000894077	0.000799102	0.00102058	0.000904586
	Fumaric acid	Fum	C4H4O4	116.011	C00122	HMDB00134	IC/MS/MS	(M‒H)‒	0.15508	0.140879	0.121802	0.139253	0.247236	0.180262	0.229003	0.218834
	2,3-Dihydroxybenzoate	2,3-Dihydroxybenzoate	C7H6O4	154.027	C00196	HMDB00397	IC/MS/MS	(M‒H)‒	0.000590222	0.00109419	0.000537783	0.00074073	0.000495726	0.00214394	0.000896397	0.00117869
	Gentisic acid	Gentisic acid	C7H6O4	154.027	C00628	HMDB00152	IC/MS/MS	(M‒H)‒	0.000590222	0.00109419	0.000537783	0.00074073	0.000495726	0.00214394	0.000896397	0.00117869
	Pyridoxal 5'-phosphate	Pyridoxal-5P	C8H10NO6P	247.025	C00018	HMDB01491	IC/MS/MS	(M‒H)‒	0.00651619	0.00762104	0.00670681	0.00694801	0.0102895	0.0103519	0.0114562	0.0106992
	L-Cysteinesulfinic acid	Cysteinesulfinic acid	C3H7NO4S	153.01	C00606	HMDB00996	IC/MS/MS	(M‒H)‒	0.0154337	0.0128493	0.0123353	0.0135395	0.017221	0.0213073	0.024805	0.0211111
	S-Sulfo-L-cysteine	S-Sulfo-Cys	C3H7NO5S2	200.977	C05824	HMDB00731	IC/MS/MS	(M‒H)‒	0.000453406	0.000885151	0.000631873	0.00065681	0.000855463	0.00107839	0.00103101	0.000988285
	4-Hydroxyphenylpyruvate	4-Hydroxyphenylpyruvate	C9H8O4	180.042	C01179	HMDB00707	IC/MS/MS	(M‒H)‒	0.000637762	0.000409381	0.000533869	0.000527004	0.000958365	0.000617649	0.000776689	0.000784234
	N-Acetyl-L-aspartic acid	N-Acetyl-Asp	C6H9NO5	175.048	C01042	HMDB00812	IC/MS/MS	(M‒H)‒	0.00173526	0.00211452	0.00454964	0.0027998	0.00690513	0.00247253	0.00240636	0.003928
	Orotic acid	Orotic acid	C5H4N2O4	156.017	C00295	HMDB00226	IC/MS/MS	(M‒H)‒	0.0109571	0.0110364	0.00960607	0.0105332	0.0133061	0.0122951	0.0216401	0.0157471
	Pyruvic acid	Pyr	C3H4O3	88.016	C00022	HMDB00243	IC/MS/MS	(M‒H)‒	0.0162654	0.0114585	0.0172805	0.0150014	0.0323279	0.0141964	0.0176829	0.0214024
	Kynurenate	Kynurenic acid	C10H7NO3	189.043	C01717	HMDB00715	IC/MS/MS	(M‒H)‒	0.000749561	0.000741018	0.000821561	0.000770713	0.000517512	0.00251075	0.000436967	0.00115507
	Isovaleric acid	Isovaleric acid	C5H10O2	102.068	C08262	HMDB00718	IC/MS/MS	(M‒H)‒	0.0310114	0.0391425	0.0262268	0.0321269	0.0406782	0.0641949	0.0354914	0.0467882
	Guanosine 5'-diphosphate	GDP	C10H15N5O11P2	443.024	C00035	HMDB01201	IC/MS/MS	(M‒H)‒	0.000166837	0.000187877	0.000173347	0.000176021	0.000251024	0.000223739	0.000277898	0.000250887
	Adenosine 5'-triphosphate	ATP	C10H16N5O13P3	506.996	C00002	HMDB00538	IC/MS/MS	(M‒H)‒	0.000197224	0.000228625	0.000202672	0.000209507	0.000302539	0.0002481	0.000335899	0.000295513
	Maleic acid	Maleic acid	C4H4O4	116.011	C01384	HMDB00176	IC/MS/MS	(M‒H)‒	0.0692738	0.0669599	0.0607329	0.0656555	0.0976717	0.0768718	0.0989787	0.0911741
	N-Formyl-L-methionine	N-Formylm-Met	C6H11NO3S	177.046	C03145	HMDB01015	IC/MS/MS	(M‒H)‒	0.000437423	0.000555441	0.000709381	0.000567415	0.000931869	0.000870965	0.00048324	0.000762025
	Uracil	Uracil	C4H4N2O2	112.027	C00106	HMDB00300	IC/MS/MS	(M‒H)‒	0.745852	0.879347	0.657486	0.760895	0.946419	1.08846	1.07989	1.03826
	Flavin adenine dinucleotide	FAD	C27H33N9O15P2	785.157	C00016	HMDB01248	IC/MS/MS	(M‒H)‒	0.00311374	0.00324791	0.00306001	0.00314056	0.00364208	0.00488984	0.00439747	0.0043098
	Malic acid	Mal	C4H6O5	134.022	C00149	HMDB00744	IC/MS/MS	(M‒H)‒	2.41842	2.28359	2.11027	2.27076	3.25045	2.6309	3.33305	3.07146
	L-Homocysteic acid	Homocysteic acid	C4H9NO5S	183.02	C16511	HMDB02205	IC/MS/MS	(M‒H)‒	0.00406176	0.00554058	0.00376683	0.00445639	0.00682546	0.00558618	0.00520587	0.0058725
	N-Carbamoyl-L-aspartate	N-Carbamoyl-Asp	C5H8N2O5	176.043	C00438	HMDB00828	IC/MS/MS	(M‒H)‒	0.00113179	0.000778552	0.00133061	0.00108032	0.00105139	0.00161542	0.00183569	0.00150084
	D-Glyceric acid	Glyceric acid	C3H6O4	106.027	C00258	HMDB00139	IC/MS/MS	(M‒H)‒	0.06069	0.0547804	0.0520513	0.0558405	0.0710872	0.0834994	0.0694997	0.0746954
	Allantoic acid	Allantoic acid	C4H8N4O4	176.055	C00499	HMDB01209	IC/MS/MS	(M‒H)‒	0.00166727	0.00185964	0.00103085	0.00151925	0.00150243	0.00211822	0.00251909	0.00204658
	Phosphoric acid	Phosphoric acid	H3O4P	97.9769	C00009	HMDB02142	IC/MS/MS	(M‒H)‒	12.5881	11.0459	11.1972	11.6104	14.4379	15.2767	16.4493	15.388
	Pyrophosphate	Pyrophosphate	H4P2O7	177.943	C00013	HMDB00250	IC/MS/MS	(M‒H)‒	1.09561	1.01745	1.00187	1.03831	1.25327	1.37187	1.44134	1.35549
	2-Hydroxy-3-methylbutyric acid	2-Hydroxyisovaleric acid	C5H10O3	118.063	－	HMDB00407	IC/MS/MS	(M‒H)‒	0.0252308	0.0386506	0.0380175	0.0339663	0.0330462	0.0572039	0.040502	0.043584
	D-Glucarate	Glucarate	C6H10O8	210.038	C00818	HMDB29881	IC/MS/MS	(M‒H)‒	0.281178	0.298289	0.279621	0.286362	0.324111	0.381835	0.379222	0.361723
	1-Butyric acid	Butyric acid	C4H8O2	88.0524	C00246	HMDB00039	IC/MS/MS	(M‒H)‒	0.0291741	0.0758951	0.0444193	0.0498295	0.0102836	0.162358	0.0169696	0.0632037
	Oxalic acid	Oxalic acid	C2H2O4	89.9953	C00209	HMDB02329	IC/MS/MS	(M‒H)‒	0.290709	0.296223	0.260792	0.282575	0.340119	0.342808	0.378461	0.353796
	2'-Deoxycytidine 5'-monophosphate	dCMP	C9H14N3O7P	307.057	C00239	HMDB01202	IC/MS/MS	(M‒H)‒	0.000806902	0.000902684	0.000587108	0.000765565	0.000678122	0.00104133	0.00119887	0.000972775
	Tartaric acid	Tartaric acid	C4H6O6	150.016	C00898	HMDB00956	IC/MS/MS	(M‒H)‒	0.00283231	0.00334327	0.00326537	0.00314698	0.0036161	0.00433282	0.00377772	0.00390888
	D-Mannose 6-phosphate	M6P	C6H13O9P	260.03	C00275	HMDB01078	IC/MS/MS	(M‒H)‒	0.0285082	0.0288741	0.0275021	0.0282948	0.0342452	0.0308891	0.0384559	0.0345301
	Glutaric acid	Glutaric acid	C5H8O4	132.042	C00489	HMDB00661	IC/MS/MS	(M‒H)‒	0.0276329	0.0383067	0.0426973	0.0362123	0.0357049	0.0503316	0.0468888	0.0443084
	Pantothenate	Pantothenate	C9H17NO5	219.111	C00864	HMDB00210	IC/MS/MS	(M‒H)‒	0.18408	0.195868	0.181872	0.187274	0.187021	0.255171	0.245103	0.229098
	Na-Acetyl-L-asparagine	N-Acetyl-Asn	C6H10N2O4	174.064		HMDB06028	IC/MS/MS	(M‒H)‒	0.0226064	0.034415	0.0271424	0.0280546	0.0273579	0.04375	0.0305799	0.0338959
	Leucinic acid	Leucinic acid	C6H12O3	132.079	－	HMDB00665	IC/MS/MS	(M‒H)‒	0.0115134	0.0232786	0.0207979	0.01853	0.0146702	0.0290806	0.0225133	0.0220881
	D-Sorbitol 6-phosphate	Sorbitol-6P	C6H15O9P	262.045	C01096	HMDB05831	IC/MS/MS	(M‒H)‒	0.00231463	0.00187527	0.00160868	0.00193286	0.00177132	0.00207586	0.00319543	0.00234754
	2-Ketoglutaric acid	2KG	C5H6O5	146.022	C00026	HMDB00208	IC/MS/MS	(M‒H)‒	0.313815	0.327277	0.291846	0.310979	0.328701	0.383717	0.392845	0.368421
	2,3-Pyridinedicarboxylic acid	Quinolinic acid	C7H5NO4	167.022	C03722	HMDB00232	IC/MS/MS	(M‒H)‒	0.000378285	0.000259693	0.000294663	0.00031088	0.000294267	0.000324735	0.000508493	0.000375832
	5-Hydroxyindoleacetate	5-HIAA	C10H9NO3	191.058	C05635	HMDB00763	IC/MS/MS	(M‒H)‒	0.000909726	0.000431222	0.000433339	0.000591429	0.000361474	0.00126033	0.000547238	0.000723013
	D-Fructose 6-phosphate	F6P	C6H13O9P	260.03	C00085	HMDB00124	IC/MS/MS	(M‒H)‒	0.0226306	0.0229312	0.021601	0.0223876	0.0250989	0.0261982	0.0270334	0.0261101
	D-Ribose 5-phosphate	R5P	C5H11O8P	230.019	C00117	HMDB01548	IC/MS/MS	(M‒H)‒	0.00175175	0.00434993	0.00359972	0.0032338	0.00416484	0.00285824	0.00391106	0.00364471
	Adenosine 3',5'-cyclic monophosphate	cAMP	C10H12N5O6P	329.053	C00575	HMDB00058	IC/MS/MS	(M‒H)‒	0.000259725	0.000283781	0.000218752	0.000254086	0.000229546	0.000333457	0.000326761	0.000296588
	D-Gluconic acid	Gluconic acid	C6H12O7	196.058	C00257	HMDB00625	IC/MS/MS	(M‒H)‒	2.23476	2.13857	2.33149	2.23494	2.43693	2.5785	2.49848	2.50464
	D-Erythrose	Erythrose	C4H8O4	120.042	C01796	HMDB02649	IC/MS/MS	(M‒H)‒	0.317503	0.458744	0.295722	0.357323	0.406408	0.37393	0.38103	0.387123
	Adenosine 5'-diphosphate	ADP	C10H15N5O10P2	427.029	C00008	HMDB01341	IC/MS/MS	(M‒H)‒	0.00326166	0.00492206	0.00461218	0.0042653	0.00523354	0.00286635	0.00569077	0.00459689
	N-Acetyl-L-glutamate	N-Acetyl-Glu	C7H11NO5	189.064	C00624	HMDB01138	IC/MS/MS	(M‒H)‒	0.482108	0.461604	0.484165	0.475959	0.380641	0.627736	0.583884	0.530754
	D-Glucose 6-phosphate	G6P	C6H13O9P	260.03	C00092	HMDB01401	IC/MS/MS	(M‒H)‒	0.0766165	0.0779736	0.0745575	0.0763825	0.0756	0.0806551	0.0953875	0.0838809
	Glycerol	Glycerol	C3H8O3	92.0473	C00116	HMDB00131	IC/MS/MS	(M‒H)‒	0.0159016	0.0147139	0.0167172	0.0157776	0.0194808	0.0160281	0.0155218	0.0170102
	Malonic acid	Malonic acid	C3H4O4	104.011	C00383	HMDB00691	IC/MS/MS	(M‒H)‒	0.0284068	0.0322574	0.0332035	0.0312892	0.0320504	0.0363728	0.0320516	0.0334916
	Caproic acid	FFA 6:0	C6H12O2	116.084	C01585	HMDB00535	IC/MS/MS	(M‒H)‒	0.0177973	0.0281191	0.0156365	0.0205176	0.0113569	0.0385503	0.0165751	0.0221608
	L-Threonic acid	Threonic acid	C4H8O5	136.037	－	HMDB00943	IC/MS/MS	(M‒H)‒	0.17049	0.118856	0.120533	0.136626	0.117578	0.149015	0.182788	0.149794
	(1R,3R,4R,5R)-(-)-Quinic acid	Quinic acid	C7H12O6	192.063	C00296	HMDB03072	IC/MS/MS	(M‒H)‒	0.00827123	0.0102997	0.00811391	0.00889495	0.00824724	0.0100972	0.0101822	0.00950888
	Adenosine 5'-monophosphate	AMP	C10H14N5O7P	347.063	C00020	HMDB00045	IC/MS/MS	(M‒H)‒	0.149115	0.168475	0.169565	0.162385	0.146045	0.199577	0.174644	0.173422
	2-Hydroxybutyric acid/2-Hydroxyisobutyric acid/3-Hydroxyisobutyric acid	2-Hydroxybutyric acid/2-Hydroxyisobutyric acid/3-Hydroxyisobutyric acid	C4H8O3	104.047	C05984	HMDB00008	IC/MS/MS	(M‒H)‒	0.535451	0.426274	0.282141	0.414622	0.510584	0.427446	0.337318	0.425116
	5-Dehydroquinic acid	5-Dehydroquinic acid	C7H10O6	190.048	C00944	HMDB12710	IC/MS/MS	(M‒H)‒	0.0147728	0.0165497	0.0183271	0.0165499	0.0148438	0.0165938	0.02048	0.0173059
	Glycerol 2-phosphate	G2P/G3P	C3H9O6P	172.014	C02979	HMDB02520	IC/MS/MS	(M‒H)‒	0.291283	0.22105	0.205541	0.239291	0.191169	0.249259	0.322246	0.254225
	Thiamine pyrophosphate	ThPP	C12H18N4O7P2S	424.037	C00068	HMDB01372	IC/MS/MS	(M‒H)‒	0.000211018	0.000174952	0.000123647	0.000169872	0.000151269	0.00015468	0.000227016	0.000177655
	Uridine	Uridine	C9H12N2O6	244.07	C00299	HMDB00296	IC/MS/MS	(M‒H)‒	0.444323	0.391114	0.451396	0.428944	0.421584	0.341769	0.57212	0.445158
	Taurine	Taurine	C2H7NO3S	125.015	C00245	HMDB00251	IC/MS/MS	(M‒H)‒	6.5356	7.62748	5.71325	6.62544	5.83991	7.1851	7.41161	6.8122
	1,6-Anhydro-beta-D-glucose	Levoglucosan	C6H10O5	162.053	－	HMDB00640	IC/MS/MS	(M‒H)‒	1.06312	1.14028	1.03653	1.07998	1.08637	1.0441	1.14984	1.09343
	D-Fructose 1-phosphate	F1P	C6H13O9P	260.03	C01094	HMDB60467	IC/MS/MS	(M‒H)‒	0.0143127	0.0250912	0.0193697	0.0195912	0.0180207	0.0119309	0.029595	0.0198489
	D-Pyroglutamic acid	Pyroglutamic acid	C5H7NO3	129.043	C02237	HMDB00805	IC/MS/MS	(M‒H)‒	0.373109	0.388577	0.340002	0.367229	0.288357	0.402702	0.432843	0.374634
	3-Hydroxybutyric acid	3-Hydroxybutyric acid	C4H8O3	104.047	C01089	HMDB00357	IC/MS/MS	(M‒H)‒	0.421	0.427302	0.512977	0.45376	0.417277	0.566337	0.349501	0.444371
	3,4-Dihydroxyphenylacetic acid	3,4-Dihydroxyphenylacetic acid	C8H8O4	168.042	C01161	HMDB01336	IC/MS/MS	(M‒H)‒	0.000593627	0.000587813	0.000738093	0.000639844	0.000535033	0.000620136	0.000736185	0.000630452
	Salicyluric acid	Salicyluric acid	C9H9NO4	195.053	C07588	HMDB00840	IC/MS/MS	(M‒H)‒	0.000312241	0.000340844	0.000338728	0.000330604	0.000220466	0.000328589	0.000414773	0.000321276
	N-Acetyl-DL-valine	N-Acetyl-Val	C7H13NO3	159.089	－	HMDB11757	IC/MS/MS	(M‒H)‒	0.00246974	0.00216795	0.00150804	0.00204858	0.00124249	0.00231437	0.00237474	0.0019772
	N-Acetyl-DL-alanine	N-Acetyl-Ala	C5H9NO3	131.058	－	HMDB00766	IC/MS/MS	(M‒H)‒	0.083571	0.109002	0.101965	0.0981795	0.0807514	0.0987865	0.0890292	0.0895224
	Propionylglycine	PropionylGly	C5H9NO3	131.058	－	HMDB00783	IC/MS/MS	(M‒H)‒	0.083571	0.109002	0.101965	0.0981795	0.0807514	0.0987865	0.0890292	0.0895224
	O-Acetyl-L-serine	O-Acetyl-Ser	C5H9NO4	147.053	C00979	HMDB03011	IC/MS/MS	(M‒H)‒	0.0265808	0.031629	0.03363	0.0306133	0.0255678	0.0260479	0.0320047	0.0278735
	Succinic anhydride	Succinic anhydride	C4H4O3	100.016	C19524	HMDB32523	IC/MS/MS	(M‒H)‒	0.0192947	0.0147223	0.0142166	0.0160778	0.01096	0.0163472	0.0171222	0.0148098
	Glycolic acid	Glycolic acid	C2H4O3	76.016	C00160	HMDB00115	IC/MS/MS	(M‒H)‒	0.0169497	0.019395	0.0086878	0.0150108	0.00840376	0.018305	0.0142547	0.0136545
	D-Fructose 1,6-bisphosphate	FBP	C6H14O12P2	339.996	C00354	HMDB01058	IC/MS/MS	(M‒H)‒	0.000646509	0.00162748	0.00120888	0.00116096	0.000746752	0.000504742	0.00187157	0.00104102
	Succinic acid	Suc	C4H6O4	118.027	C00042	HMDB00254	IC/MS/MS	(M‒H)‒	1.40312	1.10961	1.26113	1.25795	0.731733	1.26592	1.37725	1.12497
	Cytidine 5'-diphosphate	CDP	C9H15N3O11P2	403.018	C00112	HMDB01546	IC/MS/MS	(M‒H)‒	7.94155e-05	0.000105401	0.000116999	0.000100605	8.07082e-05	1.7441e-05	0.000153019	8.37229e-05
	Acetylglycine	Acetyl-Gly	C4H7NO3	117.043	－	HMDB00532	IC/MS/MS	(M‒H)‒	0.0127383	0.012506	0.0116021	0.0122821	0.00991971	0.0103821	0.00961962	0.0099738
	UDP-N-acetyl-alpha-D-glucosamine	UDP-N-acetyl-glucosamine	C17H27N3O17P2	607.082	C00043	HMDB00290	IC/MS/MS	(M‒H)‒	0.0174187	0.0270396	0.0228743	0.0224442	0.0125784	0.0211475	0.0200275	0.0179178
	2-Methylhippuric acid	2-Methylhippuric acid	C10H11NO3	193.074	－	HMDB11723	IC/MS/MS	(M‒H)‒	0.00551452	0.00519364	0.00346776	0.00472531	0.00319918	0.00484564	0.00301569	0.00368684
	Stachyose	Stachyose	C24H42O21	666.222	C01613	HMDB03553	IC/MS/MS	(M‒H)‒	0.00892598	0.00754413	0.00873841	0.00840284	0.00462456	0.00747401	0.00778278	0.00662712
	N-Acetyl-L-leucine	N-Acetyl-Leu	C8H15NO3	173.105	C02710	HMDB11756	IC/MS/MS	(M‒H)‒	0.0117458	0.0101816	0.00958439	0.0105039	0.00543856	0.00977934	0.0095363	0.0082514
	Maltotetraose	Maltotetraose	C24H42O21	666.222	C02052	HMDB01296	IC/MS/MS	(M‒H)‒	0.0775336	0.0744429	0.0774323	0.0764696	0.0533998	0.0567033	0.0663383	0.0588138
	cis-Aconitic acid	cis-Aco	C6H6O6	174.016	C00417	HMDB00072	IC/MS/MS	(M‒H)‒	0.00362502	0.00356289	0.00343329	0.0035404	0.00265956	0.00316672	0.002222	0.00268276
	N-Acetyl-L-glutamine	N-Acetyl-Gln	C7H12N2O4	188.08	－	HMDB06029	IC/MS/MS	(M‒H)‒	0.0766933	0.173496	0.1311	0.127097	0.071	0.122043	0.0869118	0.0933183
	Cytidine-5'-monophosphate	CMP	C9H14N3O8P	323.052	C00055	HMDB00095	IC/MS/MS	(M‒H)‒	0.0179115	0.0313819	0.0381553	0.0291495	0.0152542	0.0200005	0.0280603	0.021105
	Isocitric acid	IsoCit	C6H8O7	192.027	C00311	HMDB00193	IC/MS/MS	(M‒H)‒	0.0270019	0.0441945	0.039545	0.0369138	0.0285561	0.0162853	0.0320383	0.0256266
	Uridine 5'-diphosphate	UDP	C9H14N2O12P2	404.002	C00015	HMDB00295	IC/MS/MS	(M‒H)‒	0.000274143	0.000460654	0.000542569	0.000425788	0.000342296	0.000189021	0.000342723	0.000291347
	D-Hydroorotate	Hydroorotate	C5H6N2O4	158.033	－	HMDB00528	IC/MS/MS	(M‒H)‒	0.000309894	0.000169912	0.000377351	0.000285719	6.34647e-05	0.0002781	0.000279401	0.000206989
	N-Acetyl-D-glucosamine 6-phosphate	N-Acetyl-glucosamine-6P	C8H16NO9P	301.056	C00357	HMDB01062	IC/MS/MS	(M‒H)‒	0.00324205	0.00893632	0.0053875	0.00585529	0.00341466	0.00464419	0.00346656	0.0038418
	Alpha-D-Glucosamine 1-phosphate	Glucosamine 1P	C6H14NO8P	259.046	C06156	HMDB01109	IC/MS/MS	(M‒H)‒	0.0271882	0.0265716	0.0215179	0.0250926	0.013794	0.016682	0.0198185	0.0167648
	Citric acid	Cit	C6H8O7	192.027	C00158	HMDB00094	IC/MS/MS	(M‒H)‒	0.0381764	0.0775518	0.0570939	0.0576074	0.0290836	0.0303723	0.0305566	0.0300041
	Uridine 5'-monophosphate	UMP	C9H13N2O9P	324.036	C00105	HMDB00288	IC/MS/MS	(M‒H)‒	0.0509815	0.108412	0.0954456	0.0849464	0.0282062	0.0460161	0.0511447	0.041789
	Inosine 5'-monophosphate	IMP	C10H13N4O8P	348.047	C00130	HMDB00175	IC/MS/MS	(M‒H)‒	0.00298174	0.0260873	0.0232091	0.0174261	0.00751243	0.0062481	0.00790507	0.00722186
	Guanosine 5'-monophosphate	GMP	C10H14N5O8P	363.058	C00144	HMDB01397	IC/MS/MS	(M‒H)‒	0.00524602	0.0296079	0.0331562	0.02267	0.00674932	0.00859791	0.00967293	0.00834005
	UDP-alpha-D-galactose	UDP-Galac	C15H24N2O17P2	566.055	C00052	－	IC/MS/MS	(M‒H)‒	0.00462328	0.00738235	0.00613521	0.00604695	0.000929937	0.00280295	0.00322482	0.00231924
	Uridine 5'-diphosphate glucose	UDP-Glc	C15H24N2O17P2	566.055	C00029	HMDB00286	IC/MS/MS	(M‒H)‒	0.00127552	0.00633745	0.0037163	0.00377642	0.000398445	0.000724451	0.00087754	0.000666812
	Uric acid	Uric acid	C5H4N4O3	168.028	C00366	HMDB00289	PFPP-LC/MS/MS	(M+H)+	0.0172301	0.0397918	0.0216837	0.0262352	0.0877054	0.0619386	0.0642905	0.0713115
	L-Cystine	Cys-Cys	C6H12N2O4S2	240.024	C00491	HMDB00192	PFPP-LC/MS/MS	(M+H)+	0.000131129	0.00111929	0.00080413	0.000684848	0.0011543	0.00229274	0.00101861	0.00148855
	2-Dehydro-D-gluconate	2-Dehydrogluconate	C6H10O7	194.043	C06473	HMDB11732	PFPP-LC/MS/MS	(M‒H)‒	0.0283216	0.024278	0.0412799	0.0312932	0.101949	0.034965	0.0527132	0.0632092
	Urocanic acid	Urocanic acid	C6H6N2O2	138.043	C00785	HMDB00301	PFPP-LC/MS/MS	(M+H)+	0.0104186	0.0171881	0.00824197	0.0119496	0.0225918	0.0225501	0.0239113	0.0230177
	Deoxycytidine	Deoxycytidine	C9H13N3O4	227.091	C00881	HMDB00014	PFPP-LC/MS/MS	(M+H)+	0.000359663	0.000200568	0.000456298	0.000338843	0.00051868	0.000860265	0.000551554	0.0006435
	Iminodiacetate	Iminodiacetate	C4H7NO4	133.037	C19911	HMDB11753	PFPP-LC/MS/MS	(M+H)+	0.000283865	0.000257544	0.000387115	0.000309508	0.00112332	0.000390874	0.000243398	0.000585863
	Allantoin	Allantoin	C4H6N4O3	158.044	C01551	HMDB00462	PFPP-LC/MS/MS	(M+H)+	0.03349	0.0577939	0.0314535	0.0409125	0.0846194	0.0804342	0.065406	0.0768199
	L-Saccharopine	Saccharopine	C11H20N2O6	276.132	C00449	HMDB00279	PFPP-LC/MS/MS	(M+H)+	0.00390089	0.00164082	0.00324895	0.00293022	0.00396039	0.00195373	0.0105226	0.00547889
	L-Cysteic acid	Cysteic acid	C3H7NO5S	169.005	C00506	HMDB02757	PFPP-LC/MS/MS	(M+H)+	0.00125749	0.00132762	0.000647606	0.00107757	0.00202004	0.00245236	0.00150505	0.00199248
	O-Phosphoethanolamine	O-Phosphoethanolamine	C2H8NO4P	141.019	C00346	HMDB00224	PFPP-LC/MS/MS	(M+H)+	0.0338988	0.0310668	0.0293157	0.0314271	0.0456977	0.0516405	0.0569028	0.0514136
	L-Asparate	Asp	C4H7NO4	133.037	C00049	HMDB00191	PFPP-LC/MS/MS	(M+H)+	0.33931	0.328296	0.296507	0.321371	0.459877	0.571575	0.501022	0.510825
	4-Guanidinobutanoate	4-Guanidinobutanoate	C5H11N3O2	145.085	C01035	HMDB03464	PFPP-LC/MS/MS	(M+H)+	0.165252	0.11994	0.126657	0.137283	0.183197	0.237675	0.233274	0.218048
	5-Keto-D-gluconate	5-Keto-gluconate	C6H10O7	194.043	－	HMDB11731	PFPP-LC/MS/MS	(M‒H)‒	0.00839565	0.00733993	0.0110886	0.00894141	0.0144509	0.0116025	0.0159435	0.013999
	Biopterin	Biopterin	C9H11N5O3	237.086	C06313	HMDB00468	PFPP-LC/MS/MS	(M+H)+	0.00115316	0.00112837	0.000816144	0.00103256	0.00151075	0.00190178	0.00139856	0.0016037
	Gamma-Aminobutyric acid	GABA	C4H9NO2	103.063	C00334	HMDB00112	PFPP-LC/MS/MS	(M+H)+	0.310745	0.459557	0.39862	0.389641	0.776179	0.465081	0.501259	0.58084
	3-Hydroxy-3-methylglutaric acid	3-Hydroxymethylglutaric acid	C6H10O5	162.053	C03761	HMDB00355	PFPP-LC/MS/MS	(M‒H)‒	0.0029677	0.00346107	0.00263288	0.00302055	0.00364769	0.00677773	0.00283956	0.00442166
	Beta-Alanine	Beta-Ala	C3H7NO2	89.0477	C00099	HMDB00056	PFPP-LC/MS/MS	(M+H)+	0.138163	0.134986	0.10809	0.12708	0.098074	0.306543	0.135199	0.179939
	Dimethylglycine	DMG	C4H9NO2	103.063	C01026	HMDB00092	PFPP-LC/MS/MS	(M+H)+	0.0767827	0.0798035	0.075066	0.0772174	0.0825784	0.120511	0.117304	0.106798
	Glutaric acid	Glutaric acid	C5H8O4	132.042	C00489	HMDB00661	PFPP-LC/MS/MS	(M‒H)‒	0.0030259	0.00407545	0.00570368	0.00426834	0.00455669	0.00821453	0.00489467	0.00588863
	L-Homocitrulline	Homocitrulline	C7H15N3O3	189.111	C02427	HMDB00679	PFPP-LC/MS/MS	(M+H)+	0.000991551	0.00136253	0.0009204	0.00109149	0.00126319	0.0013802	0.0017931	0.00147883
	D-Glyceric acid	Glyceric acid	C3H6O4	106.027	C00258	HMDB00139	PFPP-LC/MS/MS	(M‒H)‒	0.010433	0.0117145	0.00886632	0.0103379	0.0134056	0.0167	0.0116363	0.013914
	Uracil	Uracil	C4H4N2O2	112.027	C00106	HMDB00300	PFPP-LC/MS/MS	(M+H)+	0.118348	0.156933	0.120082	0.131788	0.183516	0.171466	0.176522	0.177168
	L-Asparagine	Asn	C4H8N2O3	132.054	C00152	HMDB00168	PFPP-LC/MS/MS	(M+H)+	0.958404	1.02541	0.883923	0.955913	1.11993	1.44696	1.28458	1.28382
	Pyridoxamine	Pyridoxamine	C8H12N2O2	168.09	C00534	HMDB01431	PFPP-LC/MS/MS	(M+H)+	0.00541367	0.00574503	0.00513671	0.0054318	0.00598494	0.0102251	0.00561776	0.00727592
	Imidazole lactate	Imidazole lactate	C6H8N2O3	156.054	C05568	－	PFPP-LC/MS/MS	(M+H)+	0.00383258	0.0035809	0.00812963	0.00518104	0.00513841	0.00864196	0.00663049	0.00680362
	L-Cysteinesulfinic acid	Cysteinesulfinic acid	C3H7NO4S	153.01	C00606	HMDB00996	PFPP-LC/MS/MS	(M‒H)‒	0.0118348	0.0134163	0.0118727	0.0123746	0.0195157	0.0152916	0.0138938	0.0162337
	L-Serine	Ser	C3H7NO3	105.043	C00065	HMDB00187	PFPP-LC/MS/MS	(M+H)+	1.18173	1.26127	1.08983	1.17761	1.41271	1.63135	1.56518	1.53641
	N-Acetylneuraminic acid	N-Acetylneuraminic acid	C11H19NO9	309.106	C00270	HMDB00230	PFPP-LC/MS/MS	(M+H)+	0.00879931	0.00783897	0.00642062	0.0076863	0.00763041	0.0119844	0.0102899	0.00996825
	2-Hydroxy-3-methylbutyric acid	2-Hydroxyisovaleric acid	C5H10O3	118.063	－	HMDB00407	PFPP-LC/MS/MS	(M‒H)‒	0.00369427	0.00621639	0.00525761	0.00505609	0.00460179	0.00912655	0.00594009	0.00655614
	Nicotinic acid	Nicotinic acid	C6H5NO2	123.032	C00253	HMDB01488	PFPP-LC/MS/MS	(M+H)+	0.00775999	0.00517916	0.00372777	0.00555564	0.00474927	0.0068031	0.00983261	0.00712833
	D-Gluconic acid	Gluconic acid	C6H12O7	196.058	C00257	HMDB00625	PFPP-LC/MS/MS	(M‒H)‒	0.673605	0.620075	0.654651	0.649444	0.886187	0.872555	0.724947	0.827896
	L-Tyrosine	Tyr	C9H11NO3	181.074	C00082	HMDB00158	PFPP-LC/MS/MS	(M+H)+	2.0048	2.30219	2.05731	2.12143	2.31773	3.12129	2.63829	2.69244
	Cytidine	Cytidine	C9H13N3O5	243.085	C00475	HMDB00089	PFPP-LC/MS/MS	(M+H)+	0.00654378	0.0078773	0.0146847	0.00970194	0.00928503	0.0155387	0.0117916	0.0122051
	DL-methionine sulfoxide	MSO	C5H11NO3S	165.046	－	HMDB02005	PFPP-LC/MS/MS	(M+H)+	0.0308623	0.0462452	0.0281724	0.0350933	0.041782	0.0476496	0.0427803	0.0440706
	Carnitine	Carnitine	C7H15NO3	161.105	C00487	HMDB00062	PFPP-LC/MS/MS	(M+H)+	1.38681	1.38247	1.37067	1.37999	1.64878	1.78345	1.74475	1.72566
	L-Methionine	Met	C5H11NO2S	149.051	C00073	HMDB00696	PFPP-LC/MS/MS	(M+H)+	2.02994	2.35513	2.0492	2.14476	2.20618	3.12378	2.68659	2.67218
	Pipecolic acid	Pipecolic acid	C6H11NO2	129.079	C00408	HMDB00070	PFPP-LC/MS/MS	(M+H)+	0.0679193	0.064082	0.0525028	0.0615013	0.0634623	0.084893	0.0796742	0.0760099
	L-Valine	Val	C5H11NO2	117.079	C00183	HMDB00883	PFPP-LC/MS/MS	(M+H)+	2.46615	2.30715	2.40241	2.3919	2.49254	3.45916	2.82619	2.92597
	L-Lysine	Lys	C6H14N2O2	146.106	C00047	HMDB00182	PFPP-LC/MS/MS	(M+H)+	1.80541	1.99147	1.70852	1.83513	1.93613	2.71777	2.07064	2.24151
	N6,N6,N6-Trimethyl-L-lysine	Trimethyl-Lys	C9H20N2O2	188.153	C03793	HMDB01325	PFPP-LC/MS/MS	(M+H)+	0.00615868	0.00589881	0.00668133	0.00624627	0.0076905	0.0074313	0.00766071	0.00759417
	Xanthine	Xanthine	C5H4N4O2	152.033	C00385	HMDB00292	PFPP-LC/MS/MS	(M+H)+	1.36903	1.57345	1.29143	1.4113	1.62774	1.67264	1.83236	1.71091
	S-Methyl-L-cysteine	S-Methyl-Cys	C4H9NO2S	135.035	－	HMDB02108	PFPP-LC/MS/MS	(M+H)+	0.000529648	0.000469213	0.000468133	0.000488998	0.000572432	0.000649695	0.000548936	0.000590354
	L-Citrulline	Citrulline	C6H13N3O3	175.096	C00327	HMDB00904	PFPP-LC/MS/MS	(M+H)+	0.0674945	0.087859	0.0756023	0.0769853	0.0928938	0.0869953	0.0979458	0.0926116
	L-Tryptophan	Trp	C11H12N2O2	204.09	C00078	HMDB00929	PFPP-LC/MS/MS	(M+H)+	0.879763	1.02039	0.892119	0.930757	0.969283	1.22165	1.11106	1.10066
	Uridine	Uridine	C9H12N2O6	244.07	C00299	HMDB00296	PFPP-LC/MS/MS	(M‒H)‒	0.233708	0.235156	0.256718	0.241861	0.29545	0.246072	0.313369	0.284964
	Glycylglycine	Gly-Gly	C4H8N2O3	132.054	C02037	HMDB11733	PFPP-LC/MS/MS	(M+H)+	0.0275253	0.0300476	0.024476	0.0273497	0.0289602	0.0309523	0.0366682	0.0321936
	N2-Acetyl- L-lysine	N-Acetyl-Lys	C8H16N2O3	188.116	C12989	HMDB00446	PFPP-LC/MS/MS	(M+H)+	0.0101362	0.010069	0.00972608	0.00997708	0.0098797	0.0119429	0.0133214	0.0117147
	L-Proline	Pro	C5H9NO2	115.063	C00148	HMDB00162	PFPP-LC/MS/MS	(M+H)+	1.17439	1.40978	1.34945	1.31121	1.3328	1.67039	1.59984	1.53434
	Xanthosine	Xanthosine	C10H12N4O6	284.076	C01762	HMDB00299	PFPP-LC/MS/MS	(M+H)+	0.103105	0.146552	0.088973	0.112877	0.104844	0.157989	0.132995	0.131943
	Adenine	Adenine	C5H5N5	135.054	C00147	HMDB00034	PFPP-LC/MS/MS	(M+H)+	0.0473384	0.0537701	0.0455986	0.0489024	0.0547717	0.0543329	0.0621332	0.0570793
	L-Homoarginine	Homoarginine	C7H16N4O2	188.127	C01924	HMDB00670	PFPP-LC/MS/MS	(M+H)+	0.00905049	0.00991913	0.00952405	0.00949789	0.0093723	0.0138218	0.00989352	0.0110292
	N-Acetyl-L-glutamate	N-Acetyl-Glu	C7H11NO5	189.064	C00624	HMDB01138	PFPP-LC/MS/MS	(M‒H)‒	0.135087	0.108997	0.118118	0.120734	0.0917381	0.184352	0.144453	0.140181
	L-Leucine	Leu	C6H13NO2	131.095	C00123	HMDB00687	PFPP-LC/MS/MS	(M+H)+	9.16558	10.3158	9.32786	9.60309	9.64459	12.7325	11.0209	11.1326
	L-Phenylalanine	Phe	C9H11NO2	165.079	C00079	HMDB00159	PFPP-LC/MS/MS	(M‒H)‒	0.332652	0.353728	0.317357	0.334579	0.341027	0.43191	0.388916	0.387284
	L-Isoleucine	Ile	C6H13NO2	131.095	C00407	HMDB00172	PFPP-LC/MS/MS	(M+H)+	4.36521	4.76937	4.37571	4.50343	4.55623	6.00388	5.07189	5.21067
	L-Allothreonine	Allothreonine	C4H9NO3	119.058	C05519	HMDB04041	PFPP-LC/MS/MS	(M+H)+	1.86237	2.12438	1.76694	1.9179	2.01256	2.33275	2.27768	2.20766
	L-Homoserine	HomoSer	C4H9NO3	119.058	C00263	HMDB00719	PFPP-LC/MS/MS	(M+H)+	1.86237	2.12438	1.76694	1.9179	2.01256	2.33275	2.27768	2.20766
	L-Threonine	Thr	C4H9NO3	119.058	C00188	HMDB00167	PFPP-LC/MS/MS	(M+H)+	1.86237	2.12438	1.76694	1.9179	2.01256	2.33275	2.27768	2.20766
	1-Aminocyclopropane-1-carboxylic acid	ACC	C4H7NO2	101.048	C01234	HMDB36458	PFPP-LC/MS/MS	(M‒H)‒	0.000408542	0.000786804	0.000528078	0.000574474	0.00059937	0.000567787	0.000809903	0.00065902
	L-Prolinamide	Prolinamide	C5H10N2O	114.079	C19781	－	PFPP-LC/MS/MS	(M+H)+	0.00269838	0.00309831	0.0023352	0.00271063	0.0028221	0.00325073	0.00319241	0.00308841
	Creatine	Creatine	C4H9N3O2	131.07	C00300	HMDB00064	PFPP-LC/MS/MS	(M+H)+	0.22849	0.236369	0.293985	0.252948	0.158202	0.442394	0.257375	0.28599
	Phosphocholine	Phosphocholine	C5H14NO4P	183.066	C00588	HMDB01565	PFPP-LC/MS/MS	(M+H)+	2.07426	1.89019	1.9642	1.97622	2.27129	2.06403	2.32983	2.22172
	L-Glutamic acid	Glu	C5H9NO4	147.053	C00025	HMDB00148	PFPP-LC/MS/MS	(M+H)+	2.94492	3.04488	2.80587	2.93189	2.48667	3.63295	3.75502	3.29155
	L-Ornithine	Orn	C5H12N2O2	132.09	C00077	HMDB00214	PFPP-LC/MS/MS	(M+H)+	0.4736	0.528927	0.47913	0.493886	0.501211	0.595363	0.566689	0.554421
	DL-3-Aminoisobutyric acid	3-Aminoisobutanoic acid	C4H9NO2	103.063	C05145	HMDB03911	PFPP-LC/MS/MS	(M+H)+	0.0140017	0.0113077	0.014502	0.0132705	0.00870857	0.0263798	0.00939074	0.0148264
	Oxidized glutathione	GSSG	C20H32N6O12S2	612.152	C00127	HMDB03337	PFPP-LC/MS/MS	(M‒H)‒	0.138442	0.134361	0.125798	0.132867	0.110705	0.176542	0.154868	0.147372
	Hypotaurine	Hypotaurine	C2H7NO2S	109.02	C00519	HMDB00965	PFPP-LC/MS/MS	(M+H)+	0.184913	0.202338	0.338195	0.241816	0.235524	0.281501	0.287504	0.268176
	2-Aminobutanoic acid	2-Aminobutanoic acid	C4H9NO2	103.063	C02356	HMDB00452	PFPP-LC/MS/MS	(M+H)+	0.029096	0.0248027	0.0285005	0.0274664	0.0304163	0.0348653	0.0257973	0.0303596
	L-Histidine	His	C6H9N3O2	155.07	C00135	HMDB00177	PFPP-LC/MS/MS	(M+H)+	2.34388	2.62504	2.28051	2.41648	2.21861	3.13546	2.64413	2.66607
	Creatinine	Creatinine	C4H7N3O	113.059	C00791	HMDB00562	PFPP-LC/MS/MS	(M+H)+	0.0245691	0.0257782	0.024507	0.0249514	0.0183427	0.0443348	0.0195993	0.0274256
	Carnosine	Carnosine	C9H14N4O3	226.107	C00386	HMDB00033	PFPP-LC/MS/MS	(M+H)+	0.00673717	0.00786264	0.00738433	0.00732804	0.00578894	0.0107782	0.00749013	0.00801908
	L-Gulono-1,4-lactone	Gamma-Glunolactone	C6H10O6	178.048	C01040	HMDB03466	PFPP-LC/MS/MS	(M+H)+	0.0309343	0.0309039	0.0340821	0.0319734	0.0374606	0.0346851	0.0322954	0.0348137
	1-Methylhistidine	1-Methyl-His	C7H11N3O2	169.085	C01152	HMDB00001	PFPP-LC/MS/MS	(M+H)+	0.0169752	0.016507	0.0150713	0.0161845	0.014655	0.0203392	0.0173853	0.0174598
	Thymine	Thymine	C5H6N2O2	126.043	C00178	HMDB00262	PFPP-LC/MS/MS	(M+H)+	0.000389853	0.000492461	0.000619385	0.000500566	0.000443973	0.000538589	0.0006326	0.000538387
	Niacinamide	Niacinamide	C6H6N2O	122.048	C00153	HMDB01406	PFPP-LC/MS/MS	(M+H)+	3.23549	3.36024	3.00857	3.20143	2.9481	3.69024	3.67618	3.43817
	Glycine	Gly	C2H5NO2	75.032	C00037	HMDB00123	PFPP-LC/MS/MS	(M+H)+	0.696258	0.708634	0.5893	0.664731	0.655261	0.788973	0.695223	0.713152
	Allantoic acid	Allantoic acid	C4H8N4O4	176.055	C00499	HMDB01209	PFPP-LC/MS/MS	(M+H)+	0.00602557	0.00538619	0.00352865	0.00498014	0.00390654	0.00624077	0.00587482	0.00534071
	L-Cystathionine	L-Cystathionine	C7H14N2O4S	222.067	C02291	HMDB00099	PFPP-LC/MS/MS	(M+H)+	0.0420146	0.0366377	0.0444002	0.0410175	0.0379507	0.0482134	0.044777	0.0436471
	L-Pyroglutamic acid	PyroGlu	C5H7NO3	129.043	C01879	HMDB00267	PFPP-LC/MS/MS	(M+H)+	0.309661	0.318245	0.273235	0.30038	0.255797	0.354855	0.345027	0.31856
	Lactic acid	Lac	C3H6O3	90.0317	C00186	HMDB00190	PFPP-LC/MS/MS	(M‒H)‒	3.57884	4.18185	3.49287	3.75119	3.40235	4.70001	3.76913	3.95716
	Alpha-Hydroxyisobutyric acid	2-Hydroxyisobutyric acid	C4H8O3	104.047	－	HMDB00729	PFPP-LC/MS/MS	(M‒H)‒	0.0720774	0.0754298	0.0704993	0.0726688	0.0669191	0.0914508	0.0676473	0.0753391
	N,N-Dimethylarginine	Asymmetric dimethyl-Arg	C8H18N4O2	202.143	C03626	HMDB01539	PFPP-LC/MS/MS	(M+H)+	0.0972899	0.109732	0.112979	0.106667	0.0963965	0.140886	0.0931211	0.110134
	L-Anserine (beta-alanyl-N-methylhistidine) (nitrate salt)	L-Anserine	C10H16N4O3	240.122	－	HMDB00194	PFPP-LC/MS/MS	(M+H)+	0.000392463	0.000399492	0.000469967	0.000420641	0.000280582	0.000491153	0.000527558	0.000433098
	L-Threonic acid	Threonic acid	C4H8O5	136.037	－	HMDB00943	PFPP-LC/MS/MS	(M‒H)‒	0.0415948	0.0309209	0.0276912	0.0334023	0.032702	0.03116	0.0385487	0.0341369
	N-Acetyl-D-galactosamine	N-Acetyl-galactosamine	C8H15NO6	221.09	C01132	HMDB00212	PFPP-LC/MS/MS	(M+H)+	0.112537	0.133694	0.114368	0.1202	0.111127	0.133441	0.120763	0.121777
	L-Alanine	Ala	C3H7NO2	89.0477	C00041	HMDB00161	PFPP-LC/MS/MS	(M+H)+	3.79285	4.33437	4.3991	4.17544	3.33825	5.75022	3.5745	4.22099
	rac 3-Hydroxyisobutyric acid	3-Hydroxyisobutyric acid	C4H8O3	104.047	C01188	HMDB00336	PFPP-LC/MS/MS	(M‒H)‒	0.0164193	0.0236353	0.0180182	0.0193576	0.0150724	0.0287363	0.0143081	0.0193723
	Taurine	Taurine	C2H7NO3S	125.015	C00245	HMDB00251	PFPP-LC/MS/MS	(M‒H)‒	2.18158	2.28	1.91762	2.1264	2.05491	2.18498	2.10404	2.11465
	Hypoxanthine	Hypoxanthine	C5H4N4O	136.038	C00262	HMDB00157	PFPP-LC/MS/MS	(M+H)+	4.01427	3.72181	3.54725	3.76111	3.29886	3.74471	4.08699	3.71019
	N-Acetyl-DL-alanine	N-Acetyl-Ala	C5H9NO3	131.058	－	HMDB00766	PFPP-LC/MS/MS	(M‒H)‒	0.0244544	0.0345563	0.0298272	0.0296126	0.0262526	0.0337632	0.026666	0.0288939
	4-Hydroxy-L-proline	4-Hydroxy-Pro	C5H9NO3	131.058	C01157	HMDB06055	PFPP-LC/MS/MS	(M+H)+	0.0879644	0.0915039	0.0719904	0.0838195	0.0430457	0.132009	0.0698061	0.0816202
	D-Glucarate	Glucarate	C6H10O8	210.038	C00818	HMDB29881	PFPP-LC/MS/MS	(M‒H)‒	0.0333868	0.0286424	0.0250147	0.0290146	0.0229309	0.0281021	0.0336262	0.0282197
	Pyridoxal	Pyridoxal	C8H9NO3	167.058	C00250	HMDB01545	PFPP-LC/MS/MS	(M+H)+	0.0197753	0.0253761	0.0226763	0.0226092	0.0180676	0.0266458	0.0211778	0.0219637
	N-methylethanolamine	N-Methylethanolamine	C3H9NO	75.0684	－	－	PFPP-LC/MS/MS	(M+H)+	0.00217987	0.00165223	0.00172974	0.00185395	0.00159129	0.00139673	0.00241099	0.00179967
	(1R,3R,4R,5R)-(-)-Quinic acid	Quinic acid	C7H12O6	192.063	C00296	HMDB03072	PFPP-LC/MS/MS	(M+H)+	0.0021286	0.00224722	0.00225795	0.00221126	0.00161788	0.00244107	0.00229877	0.00211924
	5-Hydroxy-L-lysine	5-Hydroxy-Lys	C6H14N2O3	162.1	C16741	HMDB00450	PFPP-LC/MS/MS	(M+H)+	0.000813262	0.000889448	0.000782236	0.000828315	0.000826337	0.000749151	0.000732008	0.000769165
	Choline	Choline	C5H13NO	103.1	C00114	HMDB00097	PFPP-LC/MS/MS	(M+H)+	2.95237	2.81868	2.7695	2.84685	2.33839	2.87785	2.60757	2.60794
	Malonic acid	Malonic acid	C3H4O4	104.011	C00383	HMDB00691	PFPP-LC/MS/MS	(M‒H)‒	0.00187668	0.00183835	0.00183389	0.00184964	0.00124632	0.00200959	0.0018216	0.0016925
	DL-2-Hydroxybutyric acid	2-Hydroxybutyric acid	C4H8O3	104.047	C05984	HMDB00008	PFPP-LC/MS/MS	(M‒H)‒	0.156841	0.172019	0.120643	0.149834	0.14766	0.161038	0.101017	0.136572
	Succinic anhydride	Succinic anhydride	C4H4O3	100.016	C19524	HMDB32523	PFPP-LC/MS/MS	(M+H)+	0.0882346	0.0648771	0.0697091	0.0742736	0.0494824	0.0672662	0.0828598	0.0665361
	Dehydro-L-ascorbic acid	Dehydroascorbic acid	C6H6O6	174.016	C05422	HMDB01264	PFPP-LC/MS/MS	(M‒H)‒	0.0028187	0.00463876	0.0038718	0.00377642	0.00220529	0.00345279	0.00438314	0.00334708
	L-Arginine	Arg	C6H14N4O2	174.112	C00062	HMDB00517	PFPP-LC/MS/MS	(M+H)+	0.00867389	0.0132542	0.0101684	0.0106988	0.00826191	0.0107384	0.00847301	0.00915778
	Galactosamine and Glucosamine	Galactosamine	C6H13NO5	179.079	C02262	－	PFPP-LC/MS/MS	(M+H)+	0.14644	0.166306	0.149395	0.154047	0.117946	0.123097	0.144193	0.128412
	Trigonelline	Trigonelline	C7H7NO2	137.048	C01004	HMDB00875	PFPP-LC/MS/MS	(M+H)+	0.0525538	0.038924	0.0329985	0.0414921	0.028566	0.02178	0.0517235	0.0340232
	Inosine	Inosine	C10H12N4O5	268.081	C00294	HMDB00195	PFPP-LC/MS/MS	(M+H)+	1.0272	1.00631	0.971256	1.00159	0.72931	0.808881	0.87595	0.804714
	Glycolic acid	Glycolic acid	C2H4O3	76.016	C00160	HMDB00115	PFPP-LC/MS/MS	(M‒H)‒	0.00287998	0.00469116	0.00269003	0.00342039	0.00195442	0.00346177	0.00265773	0.0026913
	L-Glutamine	Gln	C5H10N2O3	146.069	C00064	HMDB00641	PFPP-LC/MS/MS	(M+H)+	3.7951	4.7786	4.17608	4.24993	3.01115	3.77421	3.01694	3.26743
	Reduced glutathione	GSH	C10H17N3O6S	307.084	C00051	HMDB00125	PFPP-LC/MS/MS	(M+H)+	1.07873	0.482167	0.809282	0.790059	0.36924	0.734258	0.679267	0.594255
	L-Cysteinylglycine	Cys-Gly	C5H10N2O3S1	178.041	C00051	HMDB00078	PFPP-LC/MS/MS	(M+H)+	0.0109308	0.00598784	0.00802433	0.00831432	0.00384307	0.00800777	0.00661297	0.0061546
	Tricarballylic acid	Tricarballylic acid	C6H8O6	176.032	－	HMDB31193	PFPP-LC/MS/MS	(M+H)+	0.00253501	0.00354036	0.00235684	0.00281074	0.00214848	0.00147429	0.00226992	0.00196423
	Acetylglycine	Acetyl-Gly	C4H7NO3	117.043	－	HMDB00532	PFPP-LC/MS/MS	(M‒H)‒	0.00534343	0.00392566	0.00456818	0.00461242	0.0041311	0.00204715	0.00320105	0.00312643
	Amino adipic acid	Amino adipic acid	C6H11NO4	161.069	C00956	HMDB00510	PFPP-LC/MS/MS	(M‒H)‒	0.00159877	0.000712088	0.00312435	0.00181173	0.000948613	0.000997451	0.00147312	0.00113973
	Glycerophosphocholine	Glycerophosphocholine	C8H20NO6P	257.103	C00670	HMDB00086	PFPP-LC/MS/MS	(M+H)+	0.499778	0.562936	0.362842	0.475186	0.272061	0.353132	0.24561	0.290268
	N-Acetyl-L-glutamine	N-Acetyl-Gln	C7H12N2O4	188.08	－	HMDB06029	PFPP-LC/MS/MS	(M‒H)‒	0.00944126	0.0197955	0.0172746	0.0155038	0.00564482	0.0131344	0.00874976	0.00917633
	Gamma-L-Glutamylcysteine	Gamma-Glu-Cys	C8H14N2O5S1	250.062	C00669	HMDB01049	PFPP-LC/MS/MS	(M+H)+	0.00639054	0.0042358	0.00612	0.00558211	0.00186971	0.00355106	0.00386194	0.00309424
	Guanosine	Guanosine	C10H13N5O5	283.092	C00387	HMDB00133	PFPP-LC/MS/MS	(M+H)+	0.0168887	0.0362672	0.0490513	0.034069	0.0104942	0.0136573	0.0172188	0.0137901

## Sheet: Table S7
	Table S7. Hydrophobic metabolite profiles of livers in Pg-treated db/db mice
	Compound name	Formula	Exact Mass	Precursor-ion	Product-ion	MRM transition	Method	RT(min)	Concentration of each lipid compounds (pmol/mg-liver weight)
						Quan			Control				Pg
									1	2	3	Mean	1	2	3	Mean
	ChE(16:0)	C43H76O2	624.585	[M + NH4]+	[C27H45]+ (369.4)	642.6 > 369.35	C18-SFC/MS/MS	7.74±0	7.4959	8.17796	13.2528	9.64221	8.3878	11.093	4.7787	8.08651
	ChE(16:1)	C43H74O2	622.569	[M + NH4]+	[C27H45]+ (369.4)	640.6 > 369.35	C18-SFC/MS/MS	7.5±0.01	38.5435	37.3702	65.6501	47.1879	57.817	56.5476	34.7033	49.6893
	ChE(17:1)	C44H76O2	636.585	[M + NH4]+	[C27H45]+ (369.4)	654.6 > 369.35	C18-SFC/MS/MS	7.76±0.01	5.58368	5.27179	6.80965	5.88837	5.68865	5.81445	3.99442	5.16584
	ChE(18:0)	C45H80O2	652.616	[M + NH4]+	[C27H45]+ (369.4)	670.65 > 369.35	C18-SFC/MS/MS	8.03±0.01	37.0195	29.8445	43.5705	36.8115	25.4464	34.4093	23.7523	27.8693
	ChE(18:1)	C45H78O2	650.6	[M + NH4]+	[C27H45]+ (369.4)	668.65 > 369.35	C18-SFC/MS/MS	8.04±0.01	1554.58	1211.38	1801.18	1522.38	1114.78	1476.13	958.176	1183.03
	ChE(18:2)	C45H76O2	648.585	[M + NH4]+	[C27H45]+ (369.4)	666.6 > 369.35	C18-SFC/MS/MS	7.86±0	1665.8	1493.78	2650.14	1936.57	2059.67	3014.52	1562.77	2212.32
	ChE(18:3)	C45H74O2	646.569	[M + NH4]+	[C27H45]+ (369.4)	664.6 > 369.35	C18-SFC/MS/MS	7.76±0.03	213.572	200.926	360.65	258.383	325.884	376.875	229.35	310.703
	ChE(18:4)	C45H72O2	644.553	[M + NH4]+	[C27H45]+ (369.4)	662.6 > 369.35	C18-SFC/MS/MS	7.61±0.01	2.72649	3.04753	4.37596	3.38333	1.83051	3.73192	1.14121	2.23455
	ChE(20:1)	C47H82O2	678.631	[M + NH4]+	[C27H45]+ (369.4)	696.65 > 369.35	C18-SFC/MS/MS	8.62±0.01	22.1736	24.3323	52.6053	33.0371	28.6957	36.243	23.4145	29.4511
	ChE(20:2)	C47H80O2	676.616	[M + NH4]+	[C27H45]+ (369.4)	694.65 > 369.35	C18-SFC/MS/MS	8.42±0.02	24.6124	24.4703	49.0686	32.7171	29.7452	46.6726	26.0874	34.1684
	ChE(20:3)	C47H78O2	674.6	[M + NH4]+	[C27H45]+ (369.4)	692.65 > 369.35	C18-SFC/MS/MS	8.19±0	81.1563	102.251	147.884	110.43	84.647	139.808	97.6044	107.353
	ChE(20:4)	C47H76O2	672.585	[M + NH4]+	[C27H45]+ (369.4)	690.6 > 369.35	C18-SFC/MS/MS	8.03±0.02	351.324	412.156	330.045	364.508	201.671	335.67	241.725	259.689
	ChE(20:5)	C47H74O2	670.569	[M + NH4]+	[C27H45]+ (369.4)	688.6 > 369.35	C18-SFC/MS/MS	7.94±0	277.399	307.708	247.625	277.578	197.194	270.353	248.995	238.847
	ChE(22:1)	C49H86O2	706.663	[M + NH4]+	[C27H45]+ (369.4)	724.7 > 369.35	C18-SFC/MS/MS	9.28±0.01	3.01875	1.75658	22.9908	9.25538	9.50794	5.62984	5.9924	7.0434
	ChE(22:4)	C49H80O2	700.616	[M + NH4]+	[C27H45]+ (369.4)	718.65 > 369.35	C18-SFC/MS/MS	8.5±0	18.9619	26.0474	25.7515	23.5869	16.2101	27.3907	20.8009	21.4672
	ChE(22:5)	C49H78O2	698.6	[M + NH4]+	[C27H45]+ (369.4)	716.65 > 369.35	C18-SFC/MS/MS	8.4±0	195.239	233.147	196.546	208.31	189.499	246.428	212.035	215.987
	ChE(22:6)	C49H76O2	696.585	[M + NH4]+	[C27H45]+ (369.4)	714.6 > 369.35	C18-SFC/MS/MS	8.31±0	1091.44	1237.1	1308.72	1212.42	1417.25	1699.76	1316.46	1477.82
	18:1 (d7) Chol Ester	C45H71(D7)O2	658.16	[M + NH4]+	[C27H45]+ (369.4)	675.7 > 369.4	C18-SFC/MS/MS	3.28±0.1
	ChE total								5590.64	5358.77	7326.86	6092.09	5773.92	7787.08	5011.78	6190.92
	FA(14:0)	C14H28O2	228.209	[M - H]-	[M - H]-	227.2 > 227.2	C18-SFC/MS/MS	4.1±0	152.087	181.364	142.331	158.594	123.732	136.368	143.32	134.473
	FA(16:0)	C16H32O2	256.24	[M - H]-	[M - H]-	255.25 > 255.25	C18-SFC/MS/MS	4.37±0	9787.88	10067.2	9789.15	9881.41	11667.1	12247.6	11302.5	11739.1
	FA(16:1)	C16H30O2	254.225	[M - H]-	[M - H]-	253.2 > 253.2	C18-SFC/MS/MS	4.25±0	2293.46	2409.92	1965.07	2222.82	2030.16	1935.58	2148.63	2038.12
	FA(17:0)	C17H34O2	270.256	[M - H]-	[M - H]-	269.25 > 269.25	C18-SFC/MS/MS	4.5±0	161.25	172.061	187.314	173.542	192.758	217.557	202.667	204.327
	FA(17:1)	C17H32O2	268.24	[M - H]-	[M - H]-	267.25 > 267.25	C18-SFC/MS/MS	4.37±0	172.039	155.525	187.019	171.528	157.76	180.49	200.861	179.704
	FA(18:0)	C18H36O2	284.272	[M - H]-	[M - H]-	283.25 > 283.25	C18-SFC/MS/MS	4.65±0	4711.1	4861.36	3780.98	4451.15	4266.47	4319.18	5076.97	4554.21
	FA(18:1)	C18H34O2	282.256	[M - H]-	[M - H]-	281.25 > 281.25	C18-SFC/MS/MS	4.5±0	16021.9	16161.8	14711.1	15631.6	14210.2	15124.5	16447.8	15260.8
	FA(18:2)	C18H32O2	280.24	[M - H]-	[M - H]-	279.25 > 279.25	C18-SFC/MS/MS	4.44±0.05	13936.7	10757.5	15416.5	13370.2	18177.9	19787.7	19195.6	19053.7
	FA(18:3)	C18H30O2	278.225	[M - H]-	[M - H]-	277.2 > 277.2	C18-SFC/MS/MS	4.46±0.01	1219.49	1025.42	1213.36	1152.76	1770.37	1869.34	1596.7	1745.47
	FA(18:4)	C18H28O2	276.209	[M - H]-	[M - H]-	275.2 > 275.2	C18-SFC/MS/MS	4.39±0	57.6748	54.6716	51.5713	54.6392	62.4509	73.1268	65.9469	67.1749
	FA(19:1)	C19H36O2	296.272	[M - H]-	[M - H]-	295.25 > 295.25	C18-SFC/MS/MS	4.65±0.01	48.1049	55.0645	51.4013	51.5236	63.876	67.0937	54.9881	61.986
	FA(20:1)	C20H38O2	310.287	[M - H]-	[M - H]-	309.3 > 309.3	C18-SFC/MS/MS	4.79±0	224.711	247.249	353.402	275.12	287.457	309.877	306.488	301.274
	FA(20:2)	C20H36O2	308.272	[M - H]-	[M - H]-	307.25 > 307.25	C18-SFC/MS/MS	4.75±0.14	169.878	183.031	238.749	197.219	262.992	331.455	271.162	288.536
	FA(20:3)	C20H34O2	306.256	[M - H]-	[M - H]-	305.25 > 305.25	C18-SFC/MS/MS	4.55±0.19	565.576	548.757	697.738	604.024	651.231	932.342	789.673	791.082
	FA(20:4)	C20H32O2	304.24	[M - H]-	[M - H]-	303.25 > 303.25	C18-SFC/MS/MS	4.85±0.29	1858.39	1838.62	1451.81	1716.28	1243.25	1786.97	1808.16	1612.79
	FA(20:5)	C20H30O2	302.225	[M - H]-	[M - H]-	301.2 > 301.2	C18-SFC/MS/MS	2.43±2.12	1440.96	1392.37	1047.53	1293.62	1524.56	1585.15	1587.26	1565.66
	FA(22:4)	C22H36O2	332.272	[M - H]-	[M - H]-	331.25 > 331.25	C18-SFC/MS/MS	4.81±0	83.3526	148.533	105.474	112.453	119.606	156.044	133.034	136.228
	FA(22:5)	C22H34O2	330.256	[M - H]-	[M - H]-	329.25 > 329.25	C18-SFC/MS/MS	4.8±0	682.92	725.96	641.436	683.439	869.665	959.463	874.261	901.13
	FA(22:6)	C22H32O2	328.24	[M - H]-	[M - H]-	327.25 > 327.25	C18-SFC/MS/MS	4.78±0	1849.01	1743.96	1736.53	1776.5	2355.98	2857.46	2211.53	2474.99
	16:0 (13C16) FFA	13C16H32O2	270.279	[M - H]-	[M - H]-	271.3 > 271.3	C18-SFC/MS/MS	5.3±0
	FA total								55436.5	52730.4	53768.5	53978.5	60037.5	64877.3	64417.5	63110.8
	Cer(d18:1/16:0)	C34H67N1O3	537.512	[M + H]+	[C18H34N]+ (264.3)	536.5 > 280.25	DEA-SFC/MS/MS	5.39±0	65.2113	81.364	79.0612	75.2122	59.0312	95.0573	95.6818	83.2567
	Cer(d18:1/18:0)	C36H71N1O3	565.543	[M + H]+	[C18H34N]+ (264.3)	564.55 > 308.25	DEA-SFC/MS/MS	5.41±0	9.74843	8.43816	4.3307	7.50576	2.46239	7.77058	10.2697	6.83422
	Cer(d18:1/20:0)	C38H75N1O3	593.575	[M + H]+	[C18H34N]+ (264.3)	592.55 > 336.3	DEA-SFC/MS/MS	5.42±0	9.77865	11.8645	9.33605	10.3264	11.86	10.0716	10.543	10.8249
	Cer(d18:1/22:0)	C40H79N1O3	621.606	[M + H]+	[C18H34N]+ (264.3)	620.6 > 364.3	DEA-SFC/MS/MS	5.43±0	65.3854	70.6181	118.603	84.8689	100.689	87.38	92.0251	93.3646
	Cer(d18:1/22:1)	C40H77N1O3	619.59	[M + H]+	[C18H34N]+ (264.3)	618.6 > 362.3	DEA-SFC/MS/MS	5.47±0	3.04277	5.53431	8.00303	5.5267	7.17766	6.12586	3.74237	5.68196
	Cer(d18:1/24:0)	C42H83N1O3	649.637	[M + H]+	[C18H34N]+ (264.3)	648.65 > 392.35	DEA-SFC/MS/MS	5.44±0	60.2826	68.3637	59.5264	62.7243	61.3262	59.3099	77.8582	66.1648
	15:0-d18:1 (d7) Cer	C33H58(D7)NO3	530.54	[M + H]+	[C18H34N]+ (264.3)	531.55 > 271.3	DEA-SFC/MS/MS	5.38±0
	Cer_Total								213.449	246.183	278.861	246.164	242.546	265.715	290.12	266.127
	Cholesterol (d7)	C27H39O(D7)	393.399	[M + H]+	(147.1)	376.4 > 147.1	DEA-SFC/MS/MS	4.23±0.01
	Cholesterol	C27H46O				369.35 > 147.1, 369.35 > 287.4	DEA-SFC/MS/MS	4.23±0.01	8596.2	10212	8486.97	9098.39	10302.9	9901.19	7966.5	9390.19
	DG(14:0/16:0)	C33H64O5	540.475	[M + NH4]+	[M + H - Acyl FA]+	558.5 > 313.25, 558.5 > 285.25	DEA-SFC/MS/MS	4.1±0	4.14181	3.90225	2.29433	3.44613	2.19631	2.8814	2.50465	2.52746
	DG(14:0/16:1)	C33H62O5	538.46	[M + NH4]+	[M + H - Acyl FA]+	556.5 > 311.25, 556.5 > 285.25	DEA-SFC/MS/MS	4.15±0.02	2.50381	2.30153	1.5226	2.10931	1.68059	1.33314	0.960327	1.32469
	DG(14:0/18:0)	C35H68O5	568.507	[M + NH4]+	[M + H - Acyl FA]+	586.55 > 341.3, 586.55 > 285.25	DEA-SFC/MS/MS	4.18±0.02	1.80693	1.51425	0.869807	1.397	1.0681	0.963952	1.00592	1.01266
	DG(14:0/18:1)	C35H66O5	566.491	[M + NH4]+	[M + H - Acyl FA]+	584.5 > 339.3, 584.5 > 285.25	DEA-SFC/MS/MS	4.2±0	35.0717	37.5976	26.3793	33.0162	20.3873	23.7103	21.0937	21.7304
	DG(14:0/18:2)	C35H64O5	564.475	[M + NH4]+	[M + H - Acyl FA]+	582.5 > 337.25, 582.5 > 285.25	DEA-SFC/MS/MS	4.22±0	31.1486	29.6791	31.5958	30.8078	39.6982	47.9765	34.3597	40.6781
	DG(14:0/18:3)	C35H62O5	562.46	[M + NH4]+	[M + H - Acyl FA]+	580.5 > 335.25, 580.5 > 285.25	DEA-SFC/MS/MS	4.27±0.01	1.17759	1.27207	0.802544	1.08407	0.897972	1.48421	0.912273	1.09815
	DG(14:0/22:4)	C39H68O5	616.507	[M + NH4]+	[M + H - Acyl FA]+	634.55 > 389.3, 634.55 > 285.25	DEA-SFC/MS/MS	4.42±0.03	0.201742	0.214745	0.152361	0.189616	0.805662	0.786445	0.60651	0.732873
	DG(14:0/22:6)	C39H64O5	612.475	[M + NH4]+	[M + H - Acyl FA]+	630.5 > 385.25, 630.5 > 285.25	DEA-SFC/MS/MS	4.45±0.02	1.29592	1.96007	1.30753	1.52117	2.94749	2.36916	1.91492	2.41052
	DG(16:0/16:0)	C35H68O5	568.507	[M + NH4]+	[M + H - Acyl FA]+	586.55 > 313.25	DEA-SFC/MS/MS	4.17±0.02	21.0923	18.9057	18.0955	19.3645	23.9746	21.9046	18.2742	21.3844
	DG(16:0/16:1)	C35H66O5	566.491	[M + NH4]+	[M + H - Acyl FA]+	584.5 > 311.25, 584.5 > 313.25	DEA-SFC/MS/MS	4.2±0	36.329	34.5235	26.7849	32.5458	41.6651	28.8048	25.2382	31.9027
	DG(16:0/17:0)	C36H70O5	582.522	[M + NH4]+	[M + H - Acyl FA]+	600.55 > 327.3, 600.55 > 313.25	DEA-SFC/MS/MS	4.19±0.02	0.574943	0.691248	0.477688	0.581293	1.00803	1.17793	0.456922	0.880959
	DG(16:0/17:1)	C36H68O5	580.507	[M + NH4]+	[M + H - Acyl FA]+	598.55 > 325.25, 598.55 > 313.25	DEA-SFC/MS/MS	4.21±0.01	1.88908	3.23132	2.07637	2.39893	2.67584	1.80814	1.63344	2.03914
	DG(16:0/18:0)	C37H72O5	596.538	[M + NH4]+	[M + H - Acyl FA]+	614.55 > 341.3, 614.55 > 313.25	DEA-SFC/MS/MS	4.22±0	22.1362	25.0564	20.2792	22.4906	24.4801	19.495	21.3015	21.7589
	DG(16:0/18:1)	C37H70O5	594.522	[M + NH4]+	[M + H - Acyl FA]+	612.55 > 339.3, 612.55 > 313.25	DEA-SFC/MS/MS	4.23±0	616.624	683.271	476.581	592.159	614.411	600.763	531.876	582.35
	DG(16:0/18:2)	C37H68O5	592.507	[M + NH4]+	[M + H - Acyl FA]+	610.55 > 337.25, 610.55 > 313.25	DEA-SFC/MS/MS	4.27±0	553.529	512.143	717.894	594.522	1156.2	1202.47	794.095	1050.92
	DG(16:0/18:3)	C37H66O5	590.491	[M + NH4]+	[M + H - Acyl FA]+	608.5 > 335.25, 608.5 > 313.25	DEA-SFC/MS/MS	4.34±0	19.3355	21.2134	20.4446	20.3311	37.6215	33.5714	24.8827	32.0252
	DG(16:0/20:0)	C39H76O5	624.569	[M + NH4]+	[M + H - Acyl FA]+	642.6 > 369.35, 642.6 > 313.25	DEA-SFC/MS/MS	4.25±0.04	0.432615	0.998231	1.10593	0.845593	1.39999	1.35266	0.837418	1.19669
	DG(16:0/20:1)	C39H74O5	622.554	[M + NH4]+	[M + H - Acyl FA]+	640.6 > 367.3, 640.6 > 313.25	DEA-SFC/MS/MS	4.29±0.01	1.40933	1.986	2.90722	2.10085	1.7954	1.67345	1.73302	1.73395
	DG(16:0/20:2)	C39H72O5	620.538	[M + NH4]+	[M + H - Acyl FA]+	638.55 > 365.3, 638.55 > 313.25	DEA-SFC/MS/MS	4.34±0	1.93167	2.33027	3.45935	2.57376	3.95828	4.71418	3.81862	4.16369
	DG(16:0/20:3)	C39H70O5	618.522	[M + NH4]+	[M + H - Acyl FA]+	636.55 > 363.3, 636.55 > 313.25	DEA-SFC/MS/MS	4.36±0.01	6.67755	9.44956	8.74302	8.29004	13.6547	16.7898	12.3742	14.2729
	DG(16:0/20:4)	C39H68O5	616.507	[M + NH4]+	[M + H - Acyl FA]+	634.55 > 361.25, 634.55 > 313.25	DEA-SFC/MS/MS	4.39±0.02	8.44511	13.1197	8.47919	10.0147	14.1691	19.7726	11.9628	15.3015
	DG(16:0/20:5)	C39H66O5	614.491	[M + NH4]+	[M + H - Acyl FA]+	632.5 > 359.25, 632.5 > 313.25	DEA-SFC/MS/MS	4.43±0.01	4.3729	5.54058	3.21018	4.37455	7.60978	7.77379	6.83152	7.40503
	DG(16:0/22:4)	C41H72O5	644.538	[M + NH4]+	[M + H - Acyl FA]+	662.55 > 389.3, 662.55 > 313.25	DEA-SFC/MS/MS	4.47±0.03	0.536329	0.673896	0.464047	0.558091	0.877114	0.951989	0.592844	0.807316
	DG(16:0/22:5)	C41H70O5	642.522	[M + NH4]+	[M + H - Acyl FA]+	660.55 > 387.3, 660.55 > 313.25	DEA-SFC/MS/MS	4.49±0.01	11.7311	17.367	14.9421	14.6801	22.5715	23.7477	19.0005	21.7732
	DG(16:0/22:6)	C41H68O5	640.507	[M + NH4]+	[M + H - Acyl FA]+	658.55 > 385.25, 658.55 > 313.25	DEA-SFC/MS/MS	4.5±0	27.7659	30.0249	33.035	30.2752	67.7954	80.9939	44.2805	64.3566
	DG(16:1/16:1)	C35H64O5	564.475	[M + NH4]+	[M + H - Acyl FA]+	582.5 > 311.25	DEA-SFC/MS/MS	4.21±0	7.2194	8.57509	6.05181	7.2821	10.5573	7.50996	6.08583	8.05103
	DG(16:1/17:0)	C36H68O5	580.507	[M + NH4]+	[M + H - Acyl FA]+	598.55 > 327.3, 598.55 > 311.25	DEA-SFC/MS/MS	4.2±0.01	0.645792	0.417191	0.2065	0.423161	0.575816	0.499373	0.559628	0.544939
	DG(16:1/17:1)	C36H66O5	578.491	[M + NH4]+	[M + H - Acyl FA]+	596.5 > 325.25, 596.5 > 311.25	DEA-SFC/MS/MS	4.24±0.01	0.81724	0.655159	0.846627	0.773009	1.0547	0.81978	0.673632	0.849372
	DG(16:1/18:0)	C37H70O5	594.522	[M + NH4]+	[M + H - Acyl FA]+	612.55 > 341.3, 612.55 > 311.25	DEA-SFC/MS/MS	4.24±0	10.9754	12.0377	9.52766	10.8469	11.0788	8.25411	9.64294	9.65862
	DG(16:1/18:1)	C37H68O5	592.507	[M + NH4]+	[M + H - Acyl FA]+	610.55 > 339.3, 610.55 > 311.25	DEA-SFC/MS/MS	4.22±0.08	181.728	203.123	154.412	179.754	189.752	153.941	139.733	161.142
	DG(16:1/18:2)	C37H66O5	590.491	[M + NH4]+	[M + H - Acyl FA]+	608.5 > 337.25, 608.5 > 311.25	DEA-SFC/MS/MS	4.31±0	90.7241	81.5434	122.584	98.284	187.647	163.887	125.952	159.162
	DG(16:1/18:3)	C37H64O5	588.475	[M + NH4]+	[M + H - Acyl FA]+	606.5 > 335.25, 606.5 > 311.25	DEA-SFC/MS/MS	4.36±0	4.97855	4.60603	4.65592	4.74683	9.03224	6.70112	6.33265	7.35534
	DG(16:1/20:1)	C39H72O5	620.538	[M + NH4]+	[M + H - Acyl FA]+	638.55 > 367.3, 638.55 > 311.25	DEA-SFC/MS/MS	4.33±0.01	1.10661	0.891715	1.56069	1.18634	1.35204	1.779	0.831872	1.32097
	DG(16:1/20:2)	C39H70O5	618.522	[M + NH4]+	[M + H - Acyl FA]+	636.55 > 365.3, 636.55 > 311.25	DEA-SFC/MS/MS	4.37±0	2.66946	2.91479	3.65083	3.07836	6.69782	6.19837	4.27995	5.72538
	DG(16:1/20:3)	C39H68O5	616.507	[M + NH4]+	[M + H - Acyl FA]+	634.55 > 363.3, 634.55 > 311.25	DEA-SFC/MS/MS	4.41±0.01	1.50353	2.01393	4.33357	2.61701	6.08612	5.47808	4.42868	5.33096
	DG(16:1/20:4)	C39H66O5	614.491	[M + NH4]+	[M + H - Acyl FA]+	632.5 > 361.25, 632.5 > 311.25	DEA-SFC/MS/MS	4.45±0.01	1.9581	1.79555	1.85904	1.8709	3.71488	2.77735	2.28852	2.92692
	DG(16:1/20:5)	C39H64O5	612.475	[M + NH4]+	[M + H - Acyl FA]+	630.5 > 359.25, 630.5 > 311.25	DEA-SFC/MS/MS	4.46±0.01	1.51792	2.02531	1.15285	1.56536	2.63247	2.35355	1.42064	2.13556
	DG(16:1/22:5)	C41H68O5	640.507	[M + NH4]+	[M + H - Acyl FA]+	658.55 > 387.3, 658.55 > 311.25	DEA-SFC/MS/MS	4.52±0.01	7.6563	9.73754	8.17712	8.52365	17.4704	17.9397	9.81118	15.0738
	DG(16:1/22:6)	C41H66O5	638.491	[M + NH4]+	[M + H - Acyl FA]+	656.5 > 385.25, 656.5 > 311.25	DEA-SFC/MS/MS	4.54±0.01	8.22148	9.43916	11.184	9.61487	23.5994	20.3018	10.4354	18.1122
	DG(17:0/18:1)	C38H72O5	608.538	[M + NH4]+	[M + H - Acyl FA]+	626.55 > 339.3, 626.55 > 327.3	DEA-SFC/MS/MS	4.25±0	6.61583	6.59874	6.356	6.52352	7.05251	7.28991	6.79576	7.04606
	DG(17:0/18:2)	C38H70O5	606.522	[M + NH4]+	[M + H - Acyl FA]+	624.55 > 337.25, 624.55 > 327.3	DEA-SFC/MS/MS	4.29±0	6.99111	4.46092	8.92194	6.79132	12.7789	16.8605	8.79618	12.8119
	DG(17:1/18:0)	C38H72O5	608.538	[M + NH4]+	[M + H - Acyl FA]+	626.55 > 341.3, 626.55 > 325.25	DEA-SFC/MS/MS	4.28±0.01	0.481757	0.428179	0.694059	0.534665	0.466798	0.439068	0.376038	0.427301
	DG(17:1/18:1)	C38H70O5	606.522	[M + NH4]+	[M + H - Acyl FA]+	624.55 > 339.3, 624.55 > 325.25	DEA-SFC/MS/MS	4.28±0	6.82199	9.12169	7.76351	7.9024	7.39214	6.77042	7.21303	7.1252
	DG(17:1/18:2)	C38H68O5	604.507	[M + NH4]+	[M + H - Acyl FA]+	622.55 > 337.25, 622.55 > 325.25	DEA-SFC/MS/MS	4.34±0	4.25819	4.70899	6.335	5.10073	9.33661	8.44285	5.92164	7.90037
	DG(18:0/18:0)	C39H76O5	624.569	[M + NH4]+	[M + H - Acyl FA]+	642.6 > 341.3	DEA-SFC/MS/MS	4.28±0.02	2.4571	1.93854	1.86507	2.0869	2.46738	2.69548	2.49815	2.55367
	DG(18:0/18:1)	C39H74O5	622.554	[M + NH4]+	[M + H - Acyl FA]+	640.6 > 339.3, 640.6 > 341.3	DEA-SFC/MS/MS	4.29±0	92.1547	91.5607	86.9907	90.2354	85.076	83.8212	80.8049	83.234
	DG(18:0/18:2)	C39H72O5	620.538	[M + NH4]+	[M + H - Acyl FA]+	638.55 > 337.25, 638.55 > 341.3	DEA-SFC/MS/MS	4.34±0	119.258	105.921	136.956	120.711	200.689	189.094	163.683	184.489
	DG(18:0/18:3)	C39H70O5	618.522	[M + NH4]+	[M + H - Acyl FA]+	636.55 > 335.25, 636.55 > 341.3	DEA-SFC/MS/MS	4.39±0.01	8.21142	6.61236	9.04354	7.95577	15.6351	15.1432	11.9774	14.2519
	DG(18:0/18:4)	C39H68O5	616.507	[M + NH4]+	[M + H - Acyl FA]+	634.55 > 333.25, 634.55 > 341.3	DEA-SFC/MS/MS	4.44±0.01	0.484477	0.370126	1.16329	0.672631	2.28435	1.91719	1.38379	1.86177
	DG(18:0/20:1)	C41H78O5	650.585	[M + NH4]+	[M + H - Acyl FA]+	668.6 > 367.3, 668.6 > 341.3	DEA-SFC/MS/MS	4.36±0.02	0.653962	0.772776	0.824275	0.750338	0.921594	0.973172	0.558806	0.817858
	DG(18:0/20:2)	C41H76O5	648.569	[M + NH4]+	[M + H - Acyl FA]+	666.6 > 365.3, 666.6 > 341.3	DEA-SFC/MS/MS	4.4±0.01	0.846691	1.27624	1.39118	1.17137	0.984128	1.84527	1.39363	1.40767
	DG(18:0/20:3)	C41H74O5	646.554	[M + NH4]+	[M + H - Acyl FA]+	664.6 > 363.3, 664.6 > 341.3	DEA-SFC/MS/MS	4.42±0	12.4169	12.2914	14.7455	13.1513	21.2409	19.324	15.4746	18.6799
	DG(18:0/20:4)	C41H72O5	644.538	[M + NH4]+	[M + H - Acyl FA]+	662.55 > 361.25, 662.55 > 341.3	DEA-SFC/MS/MS	4.42±0.01	35.2063	36.096	32.6082	34.6368	49.7549	55.1715	41.9722	48.9662
	DG(18:0/20:5)	C41H70O5	642.522	[M + NH4]+	[M + H - Acyl FA]+	660.55 > 359.25, 660.55 > 341.3	DEA-SFC/MS/MS	4.49±0.01	5.24868	5.61257	3.30388	4.72171	8.24512	7.45351	7.86896	7.85587
	DG(18:0/22:5)	C43H74O5	670.554	[M + NH4]+	[M + H - Acyl FA]+	688.6 > 387.3, 688.6 > 341.3	DEA-SFC/MS/MS	4.55±0.01	2.56889	2.5479	2.80917	2.64199	3.85099	5.18735	3.27812	4.10549
	DG(18:0/22:6)	C43H72O5	668.538	[M + NH4]+	[M + H - Acyl FA]+	686.55 > 385.25, 686.55 > 341.3	DEA-SFC/MS/MS	4.56±0	14.4927	15.4803	13.3537	14.4422	26.4771	27.6381	17.35	23.8217
	DG(18:1/18:1)	C39H72O5	620.538	[M + NH4]+	[M + H - Acyl FA]+	638.55 > 339.3	DEA-SFC/MS/MS	4.31±0	615.168	629.898	587.531	610.866	551.922	484.101	405.754	480.592
	DG(18:1/18:2)	C39H70O5	618.522	[M + NH4]+	[M + H - Acyl FA]+	636.55 > 337.25, 636.55 > 339.3	DEA-SFC/MS/MS	4.36±0	628.696	573.742	850.979	684.472	1375.2	1187.02	924.721	1162.31
	DG(18:1/18:3)	C39H68O5	616.507	[M + NH4]+	[M + H - Acyl FA]+	634.55 > 335.25, 634.55 > 339.3	DEA-SFC/MS/MS	4.42±0	65.2915	56.6674	99.1217	73.6935	175.456	150.479	105.917	143.951
	DG(18:1/18:4)	C39H66O5	614.491	[M + NH4]+	[M + H - Acyl FA]+	632.5 > 333.25, 632.5 > 339.3	DEA-SFC/MS/MS	4.47±0	4.74545	4.19025	6.40903	5.11491	15.5743	12.2928	9.28954	12.3855
	DG(18:1/19:1)	C40H74O5	634.554	[M + NH4]+	[M + H - Acyl FA]+	652.6 > 353.3, 652.6 > 339.3	DEA-SFC/MS/MS	4.35±0.02	1.30584	1.53558	1.72395	1.52179	1.78162	1.5756	1.41387	1.59036
	DG(18:1/20:1)	C41H76O5	648.569	[M + NH4]+	[M + H - Acyl FA]+	666.6 > 367.3, 666.6 > 339.3	DEA-SFC/MS/MS	4.37±0	13.1721	16.4529	21.5784	17.0678	21.2422	15.0478	14.5506	16.9469
	DG(18:1/20:2)	C41H74O5	646.554	[M + NH4]+	[M + H - Acyl FA]+	664.6 > 365.3, 664.6 > 339.3	DEA-SFC/MS/MS	4.43±0.01	6.17413	6.42312	11.1059	7.90104	12.7603	12.6485	9.0923	11.5004
	DG(18:1/20:3)	C41H72O5	644.538	[M + NH4]+	[M + H - Acyl FA]+	662.55 > 363.3, 662.55 > 339.3	DEA-SFC/MS/MS	4.46±0	15.9901	16.9012	23.3643	18.7518	36.1135	32.394	24.6685	31.0587
	DG(18:1/20:4)	C41H70O5	642.522	[M + NH4]+	[M + H - Acyl FA]+	660.55 > 361.25, 660.55 > 339.3	DEA-SFC/MS/MS	4.48±0.01	25.5424	26.9644	34.5365	29.0144	43.7825	47.932	32.3482	41.3542
	DG(18:1/20:5)	C41H68O5	640.507	[M + NH4]+	[M + H - Acyl FA]+	658.55 > 359.25, 658.55 > 339.3	DEA-SFC/MS/MS	4.52±0	25.4882	27.7377	24.1442	25.7901	40.5073	39.4247	29.906	36.6127
	DG(18:1/22:1)	C43H80O5	676.601	[M + NH4]+	[M + H - Acyl FA]+	694.65 > 395.35, 694.65 > 339.3	DEA-SFC/MS/MS	4.41±0	0.918969	0.859684	1.02311	0.933921	1.70644	0.670301	0.916272	1.09767
	DG(18:1/22:4)	C43H74O5	670.554	[M + NH4]+	[M + H - Acyl FA]+	688.6 > 389.3, 688.6 > 339.3	DEA-SFC/MS/MS	4.55±0.02	2.26189	3.36568	2.73195	2.78651	4.06757	4.97182	2.97249	4.00396
	DG(18:1/22:5)	C43H72O5	668.538	[M + NH4]+	[M + H - Acyl FA]+	686.55 > 387.3, 686.55 > 339.3	DEA-SFC/MS/MS	4.58±0	21.8272	28.969	27.4278	26.0746	51.3528	47.017	34.0302	44.1334
	DG(18:1/22:6)	C43H70O5	666.522	[M + NH4]+	[M + H - Acyl FA]+	684.55 > 385.25, 684.55 > 339.3	DEA-SFC/MS/MS	4.59±0	114.513	130.179	165.226	136.639	299.417	319.587	171.695	263.566
	DG(18:2/18:2)	C39H68O5	616.507	[M + NH4]+	[M + H - Acyl FA]+	634.55 > 337.25	DEA-SFC/MS/MS	4.42±0.01	128.619	102.133	246.192	158.981	543.033	514.18	320.098	459.104
	DG(18:2/18:3)	C39H66O5	614.491	[M + NH4]+	[M + H - Acyl FA]+	632.5 > 335.25, 632.5 > 337.25	DEA-SFC/MS/MS	4.48±0	32.7365	22.5979	49.3238	34.8861	128.862	112.46	63.0976	101.473
	DG(18:2/18:4)	C39H64O5	612.475	[M + NH4]+	[M + H - Acyl FA]+	630.5 > 333.25, 630.5 > 337.25	DEA-SFC/MS/MS	4.51±0	2.94981	2.19471	5.40376	3.51609	9.1723	7.61829	4.90862	7.23307
	DG(18:2/19:1)	C40H72O5	632.538	[M + NH4]+	[M + H - Acyl FA]+	650.55 > 353.3, 650.55 > 337.25	DEA-SFC/MS/MS	4.41±0.02	0.980976	1.12048	1.16086	1.08744	2.10956	1.82187	1.34928	1.76024
	DG(18:2/20:1)	C41H74O5	646.554	[M + NH4]+	[M + H - Acyl FA]+	664.6 > 367.3, 664.6 > 337.25	DEA-SFC/MS/MS	4.42±0.01	9.41403	10.7129	26.7861	15.6377	30.4319	33.4291	19.3806	27.7472
	DG(18:2/20:2)	C41H72O5	644.538	[M + NH4]+	[M + H - Acyl FA]+	662.55 > 365.3, 662.55 > 337.25	DEA-SFC/MS/MS	4.47±0.01	4.43864	4.57211	8.41667	5.80914	17.0471	15.8486	9.27339	14.0564
	DG(18:2/20:3)	C41H70O5	642.522	[M + NH4]+	[M + H - Acyl FA]+	660.55 > 363.3, 660.55 > 337.25	DEA-SFC/MS/MS	4.5±0.01	9.03319	7.60892	21.0826	12.5749	38.9434	44.6123	22.2625	35.2727
	DG(18:2/20:4)	C41H68O5	640.507	[M + NH4]+	[M + H - Acyl FA]+	658.55 > 361.25, 658.55 > 337.25	DEA-SFC/MS/MS	4.54±0	18.1027	15.6644	29.5358	21.101	51.3875	63.9158	31.5472	48.9502
	DG(18:2/20:5)	C41H66O5	638.491	[M + NH4]+	[M + H - Acyl FA]+	656.5 > 359.25, 656.5 > 337.25	DEA-SFC/MS/MS	4.57±0	22.6579	21.2603	23.3596	22.4259	53.3641	55.9422	37.3096	48.872
	DG(18:2/22:4)	C43H72O5	668.538	[M + NH4]+	[M + H - Acyl FA]+	686.55 > 389.3, 686.55 > 337.25	DEA-SFC/MS/MS	4.58±0.01	1.93985	2.08181	2.82922	2.28362	5.20331	7.20911	3.0482	5.15354
	DG(18:2/22:5)	C43H70O5	666.522	[M + NH4]+	[M + H - Acyl FA]+	684.55 > 387.3, 684.55 > 337.25	DEA-SFC/MS/MS	4.63±0	17.9329	20.584	31.2968	23.2712	80.9861	65.5471	38.9722	61.8351
	DG(18:2/22:6)	C43H68O5	664.507	[M + NH4]+	[M + H - Acyl FA]+	682.55 > 385.25, 682.55 > 337.25	DEA-SFC/MS/MS	4.64±0	97.6484	106.156	183.946	129.25	473.564	477.562	197.354	382.826
	DG(18:3/18:3)	C39H64O5	612.475	[M + NH4]+	[M + H - Acyl FA]+	630.5 > 335.25	DEA-SFC/MS/MS	4.52±0.01	0.94233	0.558989	1.35284	0.951386	3.19394	2.52924	2.01322	2.5788
	DG(18:3/20:1)	C41H72O5	644.538	[M + NH4]+	[M + H - Acyl FA]+	662.55 > 367.3, 662.55 > 335.25	DEA-SFC/MS/MS	4.47±0.01	0.797293	0.597396	1.27393	0.889541	2.66878	2.1497	1.31674	2.04508
	DG(18:3/20:2)	C41H70O5	642.522	[M + NH4]+	[M + H - Acyl FA]+	660.55 > 365.3, 660.55 > 335.25	DEA-SFC/MS/MS	4.5±0.01	0.888964	0.666336	1.92902	1.16144	3.01488	3.58804	1.97155	2.85816
	DG(18:3/20:3)	C41H68O5	640.507	[M + NH4]+	[M + H - Acyl FA]+	658.55 > 363.3, 658.55 > 335.25	DEA-SFC/MS/MS	4.56±0.01	0.933284	0.694713	1.444	1.024	3.54566	3.22184	2.00434	2.92394
	DG(18:3/20:4)	C41H66O5	638.491	[M + NH4]+	[M + H - Acyl FA]+	656.5 > 361.25, 656.5 > 335.25	DEA-SFC/MS/MS	4.58±0.03	1.40121	1.06504	1.37916	1.2818	3.27503	2.75814	2.36077	2.79798
	DG(18:3/22:4)	C43H70O5	666.522	[M + NH4]+	[M + H - Acyl FA]+	684.55 > 389.3, 684.55 > 335.25	DEA-SFC/MS/MS	4.62±0.02	0.293658	0.185384	0.652114	0.377052	1.53022	1.48563	0.940137	1.31866
	DG(18:3/22:5)	C43H68O5	664.507	[M + NH4]+	[M + H - Acyl FA]+	682.55 > 387.3, 682.55 > 335.25	DEA-SFC/MS/MS	4.66±0.01	1.47957	1.94097	2.44754	1.95603	6.6969	6.35446	3.01668	5.35601
	DG(18:3/22:6)	C43H66O5	662.491	[M + NH4]+	[M + H - Acyl FA]+	680.5 > 385.25, 680.5 > 335.25	DEA-SFC/MS/MS	4.7±0.01	4.59614	4.23602	6.7856	5.20592	15.5949	18.2617	8.4744	14.1103
	DG(20:3/22:6)	C45H70O5	690.522	[M + NH4]+	[M + H - Acyl FA]+	708.55 > 385.25, 708.55 > 363.3	DEA-SFC/MS/MS	4.71±0.02	0.893956	1.03188	1.62982	1.18522	4.67856	4.78564	1.77589	3.7467
	DG(20:4/20:4)	C43H68O5	664.507	[M + NH4]+	[M + H - Acyl FA]+	682.55 > 361.25	DEA-SFC/MS/MS	4.6±0.02	0.363387	0.38308	0.201708	0.316058	0.715434	1.30364	0.398222	0.805766
	DG(20:4/20:5)	C43H66O5	662.491	[M + NH4]+	[M + H - Acyl FA]+	680.5 > 359.25, 680.5 > 361.25	DEA-SFC/MS/MS	4.66±0.01	0.511934	0.479968	0.46584	0.485914	0.792176	0.939359	0.498355	0.743297
	DG(20:4/22:5)	C45H70O5	690.522	[M + NH4]+	[M + H - Acyl FA]+	708.55 > 387.3, 708.55 > 361.25	DEA-SFC/MS/MS	4.72±0.01	0.308837	0.399675	0.481239	0.396584	0.833079	1.13277	0.421603	0.795816
	DG(20:5/22:6)	C45H66O5	686.491	[M + NH4]+	[M + H - Acyl FA]+	704.5 > 385.25, 704.5 > 359.25	DEA-SFC/MS/MS	4.78±0	0.393468	0.949138	0.787512	0.710039	2.14378	2.81445	1.46538	2.1412
	15:0-18:1 (d7) DG	C36H61(D7)O5	587.98	[M + NH4]+	[M + H - Acyl FA]+	605.6 > 299.25, 605.6 > 346.35	DEA-SFC/MS/MS	4.2±0
	DGTotal								3954.4	3958.3	4596.3	4169.67	7145.13	6804.4	4824.9	6258.15
	LPC(16:0)_sn1	C24H50N1O7P1	495.332	[M + H]+	[C5H15O4NP]+	554.35 > 255.25	DEA-SFC/MS/MS	8.88±0	567.389	802.981	591.935	654.102	523.092	504.663	653.105	560.287
	LPC(16:1)_sn1	C24H48N1O7P1	493.317	[M + H]+	[C5H15O4NP]+	552.35 > 253.2	DEA-SFC/MS/MS	9.01±0.04	50.2292	52.8052	47.7522	50.2622	19.7264	9.67892	72.2525	33.886
	LPC(18:0)_sn1	C26H54N1O7P1	523.364	[M + H]+	[C5H15O4NP]+	582.4 > 283.25	DEA-SFC/MS/MS	8.82±0	496.72	384.972	330.158	403.95	467.888	311.446	481.606	420.313
	LPC(18:1)_sn1	C26H52N1O7P1	521.348	[M + H]+	[C5H15O4NP]+	580.35 > 281.25	DEA-SFC/MS/MS	9.02±0	81.1734	62.0731	96.2153	79.8206	43.3038	52.3492	62.855	52.836
	LPC(18:2)_sn1	C26H50N1O7P1	519.332	[M + H]+	[C5H15O4NP]+	578.35 > 279.25	DEA-SFC/MS/MS	9.13±0	68.4653	18.0609	84.8579	57.128	44.3133	61.6056	88.4425	64.7871
	LPC(22:6)_sn1	C30H50N1O7P1	567.332	[M + H]+	[C5H15O4NP]+	626.35 > 327.25	DEA-SFC/MS/MS	9.3±0	114.747	139.967	94.3939	116.369	64.5075	72.335	43.9135	60.252
	LPC(18:1)_sn2	C26H52N1O7P1	521.348	[M + H]+	[C5H15O4NP]+	580.35 > 281.25	DEA-SFC/MS/MS	9.02±0	173.235	204.469	92.7757	156.827	65.4079	97.2536	89.8752	84.1789
	LPC(18:2)_sn2	C26H50N1O7P1	519.332	[M + H]+	[C5H15O4NP]+	578.35 > 279.25	DEA-SFC/MS/MS	9.13±0	436.004	581.014	706.937	574.652	461.492	559.493	399.885	473.623
	LPC(20:3)_sn2	C28H52N1O7P1	545.348	[M + H]+	[C5H15O4NP]+	604.35 > 305.25	DEA-SFC/MS/MS	9.15±0.01	52.4404	70.1956	84.0127	68.8829	19.2938	47.1234	36.5447	34.3206
	LPC(20:4)_sn2	C28H50N1O7P1	543.332	[M + H]+	[C5H15O4NP]+	602.35 > 303.25	DEA-SFC/MS/MS	9.18±0	67.0298	121.189	97.6141	95.2775	19.2704	96.637	96.3812	70.7628
	LPC(20:5)_sn2	C28H48N1O7P1	541.317	[M + H]+	[C5H15O4NP]+	600.35 > 301.2	DEA-SFC/MS/MS	9.29±0.02	19.6125	31.0909	12.0388	20.9141	26.2668	9.32115	19.9542	18.5141
	18:1 (d7) LPC	C26H45(D7)NO7P1	528.72	[M + H]+	[C5H15O4NP]+	587.4 > 288.3	DEA-SFC/MS/MS	8.91±0
	LPC_Total (sn1 and sn2)								2127.05	2468.82	2238.69	2278.18	1754.56	1821.91	2044.81	1873.76
	LPC_Total (sn1)								1378.72	1460.86	1245.31	1361.63	1162.83	1012.08	1402.18	1192.36
	LPC_Total (sn2)								748.322	1007.96	993.379	916.552	591.731	809.829	642.64	681.4
	LPE(16:0)_sn1	C21H44N1O7P1	453.286	[M + H]+	[M + H - C2H8O4NP]+	452.3 > 255.25	DEA-SFC/MS/MS	10.95±0	239.176	236.251	208.475	227.968	170.765	163.832	230.803	188.467
	LPE(16:1)_sn1	C21H42N1O7P1	451.27	[M + H]+	[M + H - C2H8O4NP]+	450.25 > 253.2	DEA-SFC/MS/MS	11.09±0	8.40269	7.47423	6.19184	7.35626	6.11311	5.16789	7.18407	6.15502
	LPE(17:0)_sn1	C22H46N1O7P1	467.301	[M + H]+	[M + H - C2H8O4NP]+	466.3 > 269.25	DEA-SFC/MS/MS	10.9±0	5.78986	4.20179	4.59215	4.86127	3.88671	5.92567	5.25595	5.02278
	LPE(18:0)_sn1	C23H48N1O7P1	481.317	[M + H]+	[M + H - C2H8O4NP]+	480.3 > 283.25	DEA-SFC/MS/MS	10.86±0	363.283	332.608	285.369	327.087	243.024	282.485	327.252	284.253
	LPE(18:1)_sn1	C23H46N1O7P1	479.301	[M + H]+	[M + H - C2H8O4NP]+	478.3 > 281.25	DEA-SFC/MS/MS	10.98±0	155.752	149.883	121.805	142.48	94.5646	119.96	128.698	114.407
	LPE(18:2)_sn1	C23H44N1O7P1	477.286	[M + H]+	[M + H - C2H8O4NP]+	476.3 > 279.25	DEA-SFC/MS/MS	11.26±0	13.5845	10.0584	14.4864	12.7097	14.7522	13.1652	15.7915	14.5696
	LPE(20:0)_sn1	C25H52N1O7P1	509.348	[M + H]+	[M + H - C2H8O4NP]+	508.35 > 311.3	DEA-SFC/MS/MS	10.77±0	0.600406	0.527192	2.19585	1.10782	1.4257	1.19616	0.837954	1.15327
	LPE(20:1)_sn1	C25H50N1O7P1	507.332	[M + H]+	[M + H - C2H8O4NP]+	506.35 > 309.3	DEA-SFC/MS/MS	10.92±0	2.09266	2.10741	2.91879	2.37295	1.83048	2.10741	1.92715	1.95502
	LPE(20:3)_sn1	C25H46N1O7P1	503.301	[M + H]+	[M + H - C2H8O4NP]+	502.3 > 305.25	DEA-SFC/MS/MS	11.27±0	1.0719	0.980727	1.36501	1.13921	0.980453	1.07401	0.933746	0.996069
	LPE(20:4)_sn1	C25H44N1O7P1	501.286	[M + H]+	[M + H - C2H8O4NP]+	500.3 > 303.25	DEA-SFC/MS/MS	11.33±0	5.86727	5.70466	6.05026	5.87407	4.17743	4.85988	4.71399	4.58377
	LPE(20:5)_sn1	C25H42N1O7P1	499.27	[M + H]+	[M + H - C2H8O4NP]+	498.25 > 301.2	DEA-SFC/MS/MS	11.48±0	0.559313	0.648333	0.42352	0.543722	0.550058	0.477779	0.491689	0.506508
	LPE(22:5)_sn1	C27H46N1O7P1	527.301	[M + H]+	[M + H - C2H8O4NP]+	526.3 > 329.25	DEA-SFC/MS/MS	11.4±0.01	0.280979	0.316976	0.238597	0.27885	0.110666	0.162896	0.328714	0.200759
	LPE(22:6)_sn1	C27H44N1O7P1	525.286	[M + H]+	[M + H - C2H8O4NP]+	524.3 > 327.25	DEA-SFC/MS/MS	11.48±0	3.34381	2.91821	3.54582	3.26928	2.93708	3.06634	2.54363	2.84901
	LPE(18:2)_sn2	C23H44N1O7P1	477.286	[M + H]+	[M + H - C2H8O4NP]+	476.3 > 279.25	DEA-SFC/MS/MS	11.26±0	52.9983	41.0164	58.8264	50.947	54.9261	46.9027	52.0427	51.2905
	LPE(20:3)_sn2	C25H46N1O7P1	503.301	[M + H]+	[M + H - C2H8O4NP]+	502.3 > 305.25	DEA-SFC/MS/MS	11.27±0	8.02246	8.61484	9.68839	8.77523	5.79696	7.92911	7.43724	7.05444
	LPE(20:4)_sn2	C25H44N1O7P1	501.286	[M + H]+	[M + H - C2H8O4NP]+	500.3 > 303.25	DEA-SFC/MS/MS	11.33±0	57.7877	62.6961	55.6859	58.7233	34.0945	48.4002	44.0778	42.1908
	LPE(20:5)_sn2	C25H42N1O7P1	499.27	[M + H]+	[M + H - C2H8O4NP]+	498.25 > 301.2	DEA-SFC/MS/MS	11.48±0	7.48602	7.80676	6.49536	7.26271	5.45572	5.31469	7.24829	6.00624
	LPE(22:5)_sn2	C27H46N1O7P1	527.301	[M + H]+	[M + H - C2H8O4NP]+	526.3 > 329.25	DEA-SFC/MS/MS	11.4±0.01	4.83853	5.56415	4.65848	5.02039	2.95073	2.98176	3.58249	3.17166
	LPE(22:6)_sn2	C27H44N1O7P1	525.286	[M + H]+	[M + H - C2H8O4NP]+	524.3 > 327.25	DEA-SFC/MS/MS	11.48±0	28.273	28.8663	31.0178	29.3857	23.5036	25.7636	23.4266	24.2313
	18:1 (d7) LPE	C23H39(D7)NO7P1	486.64	[M + H]+	[M + H - C2H8O4NP]+	485.35 > 288.3	DEA-SFC/MS/MS	10.97±0
	LPE_Total (sn1 and sn2)								959.211	908.245	824.03	897.162	671.845	740.772	864.576	759.064
	LPE_Total (sn1)								799.805	753.681	657.658	737.048	545.117	603.48	726.761	625.119
	LPE_Total (sn2)								159.406	154.565	166.372	160.114	126.727	137.292	137.815	133.945
	MG(16:0)	C19H38O4	330.277	[M + H]+	[M + H - H2O]+	331.3 > 313.25	DEA-SFC/MS/MS	4.9±0	157.933	232.301	182.924	191.053	161.608	200.347	188.252	183.403
	MG(18:1)	C21H40O4	356.293	[M + H]+	[M + H - H2O]+	357.3 > 339.3	DEA-SFC/MS/MS	5.01±0.06	364.405	526.389	440.572	443.789	396.892	462.6	384.592	414.695
	MG(18:2)	C21H38O4	354.277	[M + H]+	[M + H - H2O]+	355.3 > 337.25	DEA-SFC/MS/MS	5.04±0.02	126.103	137.575	191.563	151.747	244.715	308.291	218.487	257.164
	18:1 (d7) MG	C21H33(D7)O4	363.337	[M + H]+	[M + H - H2O]+	364.35 > 346.35	DEA-SFC/MS/MS	4.99±0.02
	MG total								648.441	896.265	815.06	786.589	803.215	971.238	791.331	855.261
	PC(14:0/18:1)	C40H78N1O8P1	731.547	[M + CH3COO]-	[Acyl FA - H]-	790.55 > 227.2, 790.55 > 281.25	DEA-SFC/MS/MS	7.58±0.01	15.4727	24.903	9.36125	16.579	10.16	12.5806	12.7589	11.8332
	PC(14:0/18:2)	C40H76N1O8P1	729.531	[M + CH3COO]-	[Acyl FA - H]-	788.55 > 227.2, 788.55 > 279.25	DEA-SFC/MS/MS	7.67±0.01	21.0398	24.1447	16.881	20.6885	21.2463	26.688	29.3288	25.7544
	PC(16:0/16:0)	C40H80N1O8P1	733.562	[M + CH3COO]-	[Acyl FA - H]-	792.6 > 255.25	DEA-SFC/MS/MS	7.54±0	333.422	371.883	307.287	337.53	251.1	406.866	369.377	342.448
	PC(16:0/16:1)	C40H78N1O8P1	731.547	[M + CH3COO]-	[Acyl FA - H]-	790.55 > 255.25, 790.55 > 253.2	DEA-SFC/MS/MS	7.53±0	187.611	265.584	148.352	200.516	150.422	155.646	196.166	167.411
	PC(16:0/17:0)	C41H82N1O8P1	747.578	[M + CH3COO]-	[Acyl FA - H]-	806.6 > 255.25, 806.6 > 269.25	DEA-SFC/MS/MS	7.51±0.02	14.6249	13.7013	19.986	16.1041	11.6179	12.578	8.78631	10.9941
	PC(16:0/18:0)	C42H84N1O8P1	761.593	[M + CH3COO]-	[Acyl FA - H]-	820.6 > 255.25, 820.6 > 283.25	DEA-SFC/MS/MS	7.56±0.01	278.86	304.191	213.245	265.432	194.706	203.818	253.888	217.471
	PC(16:0/18:1)	C42H82N1O8P1	759.578	[M + CH3COO]-	[Acyl FA - H]-	818.6 > 255.25, 818.6 > 281.25	DEA-SFC/MS/MS	7.57±0	3098.52	3517.24	2514.1	3043.29	2084.47	2226.91	2440.89	2250.76
	PC(16:0/18:2)	C42H80N1O8P1	757.562	[M + CH3COO]-	[Acyl FA - H]-	816.6 > 255.25, 816.6 > 279.25	DEA-SFC/MS/MS	7.64±0	3863.49	4581.95	4620.94	4355.46	4621.6	4867.03	5097.02	4861.88
	PC(16:0/18:3)	C42H78N1O8P1	755.547	[M + CH3COO]-	[Acyl FA - H]-	814.55 > 255.25, 814.55 > 277.2	DEA-SFC/MS/MS	7.67±0	86.052	90.3225	73.2477	83.2074	71.8214	109.685	88.3652	89.9571
	PC(16:0/20:1)	C44H86N1O8P1	787.609	[M + CH3COO]-	[Acyl FA - H]-	846.6 > 255.25, 846.6 > 309.3	DEA-SFC/MS/MS	7.56±0.03	17.7663	16.9508	17.5725	17.4298	11.6769	11.7943	9.74213	11.0711
	PC(16:0/20:2)	C44H84N1O8P1	785.593	[M + CH3COO]-	[Acyl FA - H]-	844.6 > 255.25, 844.6 > 307.25	DEA-SFC/MS/MS	7.66±0	52.3013	62.2085	68.8514	61.1204	43.0551	60.3213	68.4727	57.283
	PC(16:0/20:3)	C44H82N1O8P1	783.578	[M + CH3COO]-	[Acyl FA - H]-	842.6 > 255.25, 842.6 > 305.25	DEA-SFC/MS/MS	7.66±0	530.947	707.852	625.09	621.296	452.983	582.636	665.852	567.157
	PC(16:0/20:4)	C44H80N1O8P1	781.562	[M + CH3COO]-	[Acyl FA - H]-	840.6 > 255.25, 840.6 > 303.25	DEA-SFC/MS/MS	7.67±0	822.972	1242.63	765.871	943.824	668.937	982.795	901.949	851.227
	PC(16:0/20:5)	C44H78N1O8P1	779.547	[M + CH3COO]-	[Acyl FA - H]-	838.55 > 255.25, 838.55 > 301.2	DEA-SFC/MS/MS	7.74±0	298.701	477.224	219.813	331.913	221.625	241.295	338.22	267.047
	PC(16:0/22:5)	C46H82N1O8P1	807.578	[M + CH3COO]-	[Acyl FA - H]-	866.6 > 255.25, 866.6 > 329.25	DEA-SFC/MS/MS	7.75±0	264.476	354.417	260.561	293.151	214.252	219.246	277.308	236.935
	PC(16:0/22:6)	C46H80N1O8P1	805.562	[M + CH3COO]-	[Acyl FA - H]-	864.6 > 255.25, 864.6 > 327.25	DEA-SFC/MS/MS	7.75±0	1030.32	1369.52	1061.13	1153.66	977.868	1223.7	1076.9	1092.82
	PC(16:1/18:0)	C42H82N1O8P1	759.578	[M + CH3COO]-	[Acyl FA - H]-	818.6 > 253.2, 818.6 > 283.25	DEA-SFC/MS/MS	7.57±0	84.0954	99.162	60.4644	81.2406	50.582	60.313	64.7049	58.5333
	PC(16:1/18:1)	C42H80N1O8P1	757.562	[M + CH3COO]-	[Acyl FA - H]-	816.6 > 253.2, 816.6 > 281.25	DEA-SFC/MS/MS	7.64±0.02	176.142	228.043	111.339	171.841	114.388	112.154	175.421	133.988
	PC(16:1/18:2)	C42H78N1O8P1	755.547	[M + CH3COO]-	[Acyl FA - H]-	814.55 > 253.2, 814.55 > 279.25	DEA-SFC/MS/MS	7.7±0	241.283	266.443	272.363	260.03	318.48	269.091	321.962	303.178
	PC(16:1/18:3)	C42H76N1O8P1	753.531	[M + CH3COO]-	[Acyl FA - H]-	812.55 > 253.2, 812.55 > 277.2	DEA-SFC/MS/MS	7.79±0.01	8.31975	7.2849	2.00748	5.87071	9.11526	5.21671	4.22153	6.1845
	PC(16:1/20:3)	C44H80N1O8P1	781.562	[M + CH3COO]-	[Acyl FA - H]-	840.6 > 253.2, 840.6 > 305.25	DEA-SFC/MS/MS	7.74±0.01	10.8342	10.0424	10.7737	10.5501	12.0966	10.7833	15.6013	12.827
	PC(16:1/20:4)	C44H78N1O8P1	779.547	[M + CH3COO]-	[Acyl FA - H]-	838.55 > 253.2, 838.55 > 303.25	DEA-SFC/MS/MS	7.73±0	28.3544	32.671	27.397	29.4741	12.8249	24.6356	33.6433	23.7013
	PC(16:1/20:5)	C44H76N1O8P1	777.531	[M + CH3COO]-	[Acyl FA - H]-	836.55 > 253.2, 836.55 > 301.2	DEA-SFC/MS/MS	7.82±0	8.31049	12.4551	7.9945	9.5867	10.175	9.90344	8.09126	9.38991
	PC(16:1/22:6)	C46H78N1O8P1	803.547	[M + CH3COO]-	[Acyl FA - H]-	862.55 > 253.2, 862.55 > 327.25	DEA-SFC/MS/MS	7.82±0.01	30.5255	52.125	35.3245	39.325	29.1024	37.3947	36.7904	34.4292
	PC(17:0/18:1)	C43H84N1O8P1	773.593	[M + CH3COO]-	[Acyl FA - H]-	832.6 > 269.25, 832.6 > 281.25	DEA-SFC/MS/MS	7.56±0.01	69.0216	88.4939	45.5206	67.6787	42.9979	67.276	53.8354	54.7031
	PC(17:0/18:2)	C43H82N1O8P1	771.578	[M + CH3COO]-	[Acyl FA - H]-	830.6 > 269.25, 830.6 > 279.25	DEA-SFC/MS/MS	7.62±0.01	130.338	145.022	145.591	140.317	174.76	187.8	171.146	177.902
	PC(17:0/20:4)	C45H82N1O8P1	795.578	[M + CH3COO]-	[Acyl FA - H]-	854.6 > 269.25, 854.6 > 303.25	DEA-SFC/MS/MS	7.67±0.02	21.6285	30.3046	18.0242	23.3191	20.1787	31.1336	24.4132	25.2418
	PC(17:0/22:6)	C47H82N1O8P1	819.578	[M + CH3COO]-	[Acyl FA - H]-	878.6 > 269.25, 878.6 > 327.25	DEA-SFC/MS/MS	7.74±0.02	16.1506	21.2493	18.034	18.478	22.3775	27.2994	20.8995	23.5255
	PC(18:0/18:0)	C44H88N1O8P1	789.625	[M + CH3COO]-	[Acyl FA - H]-	848.65 > 283.25	DEA-SFC/MS/MS	7.53±0	61.9014	82.22	44.5565	62.8926	48.8279	52.375	60.0306	53.7445
	PC(18:0/18:1)	C44H86N1O8P1	787.609	[M + CH3COO]-	[Acyl FA - H]-	846.6 > 283.25, 846.6 > 281.25	DEA-SFC/MS/MS	7.57±0.03	1135.4	1423.28	822.843	1127.17	830.153	837.33	1026.96	898.147
	PC(18:0/18:2)	C44H84N1O8P1	785.593	[M + CH3COO]-	[Acyl FA - H]-	844.6 > 283.25, 844.6 > 279.25	DEA-SFC/MS/MS	7.61±0	4221.77	4325.49	3402.12	3983.13	4408.36	4104.56	4661.58	4391.5
	PC(18:0/18:3)	C44H82N1O8P1	783.578	[M + CH3COO]-	[Acyl FA - H]-	842.6 > 283.25, 842.6 > 277.2	DEA-SFC/MS/MS	7.66±0.04	33.4019	42.3135	25.7128	33.8094	36.5075	25.8064	40.8029	34.3723
	PC(18:0/20:2)	C46H88N1O8P1	813.625	[M + CH3COO]-	[Acyl FA - H]-	872.65 > 283.25, 872.65 > 307.25	DEA-SFC/MS/MS	7.63±0	60.2314	74.9684	53.0906	62.7635	46.7122	47.0318	52.5434	48.7625
	PC(18:0/20:3)	C46H86N1O8P1	811.609	[M + CH3COO]-	[Acyl FA - H]-	870.6 > 283.25, 870.6 > 305.25	DEA-SFC/MS/MS	7.63±0	504.375	737.991	424.849	555.738	408.928	555.986	569.938	511.617
	PC(18:0/20:4)	C46H84N1O8P1	809.593	[M + CH3COO]-	[Acyl FA - H]-	868.6 > 283.25, 868.6 > 303.25	DEA-SFC/MS/MS	7.64±0	852.624	1155.42	626.713	878.252	604.633	875.893	777.751	752.759
	PC(18:0/20:5)	C46H82N1O8P1	807.578	[M + CH3COO]-	[Acyl FA - H]-	866.6 > 283.25, 866.6 > 301.2	DEA-SFC/MS/MS	7.71±0	303.111	414.39	164.695	294.066	203.229	216.539	281.232	233.667
	PC(18:0/22:5)	C48H86N1O8P1	835.609	[M + CH3COO]-	[Acyl FA - H]-	894.6 > 283.25, 894.6 > 329.25	DEA-SFC/MS/MS	7.71±0	160.96	207.022	115.612	161.198	114.487	111.852	152.307	126.215
	PC(18:0/22:6)	C48H84N1O8P1	833.593	[M + CH3COO]-	[Acyl FA - H]-	892.6 > 283.25, 892.6 > 327.25	DEA-SFC/MS/MS	7.72±0	703.744	923.411	566.975	731.377	561.659	663.508	728.565	651.244
	PC(18:1/18:1)	C44H84N1O8P1	785.593	[M + CH3COO]-	[Acyl FA - H]-	844.6 > 281.25	DEA-SFC/MS/MS	7.6±0	270.323	276.543	203.302	250.056	173.257	166.912	220.716	186.962
	PC(18:1/18:2)	C44H82N1O8P1	783.578	[M + CH3COO]-	[Acyl FA - H]-	842.6 > 281.25, 842.6 > 279.25	DEA-SFC/MS/MS	7.68±0	919.15	934.589	944.436	932.725	934.568	1038.22	1185.51	1052.77
	PC(18:1/18:3)	C44H80N1O8P1	781.562	[M + CH3COO]-	[Acyl FA - H]-	840.6 > 281.25, 840.6 > 277.2	DEA-SFC/MS/MS	7.74±0.01	35.3534	50.4493	41.5504	42.451	31.776	32.6573	45.4843	36.6392
	PC(18:1/20:0)	C46H90N1O8P1	815.64	[M + CH3COO]-	[Acyl FA - H]-	874.65 > 281.25, 874.65 > 311.3	DEA-SFC/MS/MS	7.52±0.02	5.30877	5.66326	16.1076	9.02654	8.98052	7.85754	5.79038	7.54281
	PC(18:1/20:2)	C46H86N1O8P1	811.609	[M + CH3COO]-	[Acyl FA - H]-	870.6 > 281.25, 870.6 > 307.25	DEA-SFC/MS/MS	7.68±0.01	16.6361	20.8858	16.0351	17.8523	9.26075	10.9197	18.4858	12.8887
	PC(18:1/20:3)	C46H84N1O8P1	809.593	[M + CH3COO]-	[Acyl FA - H]-	868.6 > 281.25, 868.6 > 305.25	DEA-SFC/MS/MS	7.7±0	106.548	153.567	112.298	124.138	78.1817	123.823	133.23	111.745
	PC(18:1/20:4)	C46H82N1O8P1	807.578	[M + CH3COO]-	[Acyl FA - H]-	866.6 > 281.25, 866.6 > 303.25	DEA-SFC/MS/MS	7.71±0	171.527	266.73	153.528	197.262	110.032	231.796	211.413	184.414
	PC(18:1/20:5)	C46H80N1O8P1	805.562	[M + CH3COO]-	[Acyl FA - H]-	864.6 > 281.25, 864.6 > 301.2	DEA-SFC/MS/MS	7.79±0	70.5464	122.365	55.27	82.7272	54.2025	53.5254	58.6358	55.4546
	PC(18:1/22:5)	C48H84N1O8P1	833.593	[M + CH3COO]-	[Acyl FA - H]-	892.6 > 281.25, 892.6 > 329.25	DEA-SFC/MS/MS	7.79±0	47.8311	60.3554	50.6365	52.941	32.2198	40.0615	48.5689	40.2834
	PC(18:1/22:6)	C48H82N1O8P1	831.578	[M + CH3COO]-	[Acyl FA - H]-	890.6 > 281.25, 890.6 > 327.25	DEA-SFC/MS/MS	7.8±0	184.343	324.328	218.787	242.486	179.91	243.301	225.891	216.367
	PC(18:2/18:2)	C44H80N1O8P1	781.562	[M + CH3COO]-	[Acyl FA - H]-	840.6 > 279.25	DEA-SFC/MS/MS	7.74±0	340.394	340.908	400.891	360.731	549.216	585.772	541.906	558.964
	PC(18:2/18:3)	C44H78N1O8P1	779.547	[M + CH3COO]-	[Acyl FA - H]-	838.55 > 279.25, 838.55 > 277.2	DEA-SFC/MS/MS	7.82±0	83.6847	78.1269	98.1253	86.6457	138.755	185.656	153.564	159.325
	PC(18:2/20:0)	C46H88N1O8P1	813.625	[M + CH3COO]-	[Acyl FA - H]-	872.65 > 279.25, 872.65 > 311.3	DEA-SFC/MS/MS	7.58±0	23.7668	21.7179	60.6799	35.3882	86.6569	41.7514	46.5108	58.3064
	PC(18:2/20:1)	C46H86N1O8P1	811.609	[M + CH3COO]-	[Acyl FA - H]-	870.6 > 279.25, 870.6 > 309.3	DEA-SFC/MS/MS	7.67±0	21.9104	40.0574	52.9648	38.3108	42.7284	41.0773	42.5481	42.1179
	PC(18:2/20:2)	C46H84N1O8P1	809.593	[M + CH3COO]-	[Acyl FA - H]-	868.6 > 279.25, 868.6 > 307.25	DEA-SFC/MS/MS	7.73±0	16.1687	24.3688	35.4687	25.3354	34.3144	39.05	38.5864	37.3169
	PC(18:2/20:3)	C46H82N1O8P1	807.578	[M + CH3COO]-	[Acyl FA - H]-	866.6 > 279.25, 866.6 > 305.25	DEA-SFC/MS/MS	7.78±0	75.9772	81.9439	95.707	84.5427	75.2499	104.925	108.258	96.1442
	PC(18:2/20:4)	C46H80N1O8P1	805.562	[M + CH3COO]-	[Acyl FA - H]-	864.6 > 279.25, 864.6 > 303.25	DEA-SFC/MS/MS	7.79±0.01	133.118	160.73	142.245	145.364	138.219	186.534	153.431	159.395
	PC(18:2/20:5)	C46H78N1O8P1	803.547	[M + CH3COO]-	[Acyl FA - H]-	862.55 > 279.25, 862.55 > 301.2	DEA-SFC/MS/MS	7.86±0	65.6841	86.4021	46.4514	66.1792	64.5799	92.3749	75.3726	77.4425
	PC(18:2/22:5)	C48H82N1O8P1	831.578	[M + CH4COO]-	[Acyl FA - H]-	890.6 > 279.25, 890.6 > 329.25	DEA-SFC/MS/MS	7.86±0	34.7235	31.2309	33.8741	33.2762	34.979	35.6913	45.1434	38.6045
	PC(20:3/20:4)	C48H82N1O8P1	831.578	[M + CH5COO]-	[Acyl FA - H]-	890.6 > 305.25, 890.6 > 303.25	DEA-SFC/MS/MS	7.81±0.02	3.72922	5.00275	4.67103	4.46767	5.64624	7.87833	8.24298	7.25585
	15:0-18:1 (d7) PC	C41H73(D7)NO8P1	753.11	[M + CH3COO]-	[Acyl FA - H]-	811.6 > 288.3, 811.6 > 241.2	DEA-SFC/MS/MS	7.51±0
	PC_Total								22405.8	26890.5	20727.3	23341.2	20870.9	22947.2	24484.7	22767.6
	PE(16:0/16:1)	C37H72N1O8P1	689.5	[M - H]-	[Acyl FA - H]-	688.5 > 255.25, 688.5 > 253.2	DEA-SFC/MS/MS	9.14±0	6.77241	9.89481	3.49903	6.72208	6.86377	3.93498	5.75611	5.51829
	PE(16:0/18:1)	C39H76N1O8P1	717.531	[M - H]-	[Acyl FA - H]-	716.5 > 255.25, 716.5 > 281.25	DEA-SFC/MS/MS	9.09±0.02	102.799	115.97	78.1545	98.9746	86.8523	79.1411	87.6703	84.5546
	PE(16:0/18:2)	C39H74N1O8P1	715.515	[M - H]-	[Acyl FA - H]-	714.5 > 255.25, 714.5 > 279.25	DEA-SFC/MS/MS	9.2±0	279.133	407.119	445.989	377.414	606.741	472.104	585.479	554.775
	PE(16:0/18:3)	C39H72N1O8P1	713.5	[M - H]-	[Acyl FA - H]-	712.5 > 255.25, 712.5 > 277.2	DEA-SFC/MS/MS	9.28±0.01	6.05785	7.11069	4.90186	6.02347	11.6308	6.25063	11.6662	9.84921
	PE(16:0/20:1)	C41H80N1O8P1	745.562	[M - H]-	[Acyl FA - H]-	744.55 > 255.25, 744.55 > 309.3	DEA-SFC/MS/MS	9.06±0.01	2.7181	6.4077	3.80878	4.31153	3.89788	4.57641	2.78124	3.75184
	PE(16:0/20:2)	C41H78N1O8P1	743.547	[M - H]-	[Acyl FA - H]-	742.55 > 255.25, 742.55 > 307.25	DEA-SFC/MS/MS	9.2±0.01	3.71527	4.98421	3.69489	4.13146	3.21589	3.25281	2.00094	2.82321
	PE(16:0/20:3)	C41H76N1O8P1	741.531	[M - H]-	[Acyl FA - H]-	740.5 > 255.25, 740.5 > 305.25	DEA-SFC/MS/MS	9.22±0	34.5615	56.4438	50.721	47.2421	48.9134	48.5289	55.4872	50.9765
	PE(16:0/20:4)	C41H74N1O8P1	739.515	[M - H]-	[Acyl FA - H]-	738.5 > 255.25, 738.5 > 303.25	DEA-SFC/MS/MS	9.23±0	211.277	371.253	287.064	289.865	251.145	333.526	326.229	303.633
	PE(16:0/20:5)	C41H72N1O8P1	737.5	[M - H]-	[Acyl FA - H]-	736.5 > 255.25, 736.5 > 301.2	DEA-SFC/MS/MS	9.33±0	42.5191	80.6244	45.4889	56.2108	62.2631	49.5952	66.7788	59.5457
	PE(16:0/22:4)	C43H78N1O8P1	767.547	[M - H]-	[Acyl FA - H]-	766.55 > 255.25, 766.55 > 331.25	DEA-SFC/MS/MS	9.33±0.01	1.26534	3.65663	1.80498	2.24232	1.54141	1.37171	1.69497	1.53603
	PE(16:0/22:5)	C43H76N1O8P1	765.531	[M - H]-	[Acyl FA - H]-	764.5 > 255.25, 764.5 > 329.25	DEA-SFC/MS/MS	9.34±0	58.0565	90.2769	61.2329	69.8554	70.5452	62.5895	77.9996	70.3781
	PE(16:0/22:6)	C43H74N1O8P1	763.515	[M - H]-	[Acyl FA - H]-	762.5 > 255.25, 762.5 > 327.25	DEA-SFC/MS/MS	9.35±0	494.114	884.037	651.721	676.624	699.878	725.048	642.819	689.248
	PE(16:1/18:0)	C39H76N1O8P1	717.531	[M - H]-	[Acyl FA - H]-	716.5 > 253.2, 716.5 > 283.25	DEA-SFC/MS/MS	9.11±0	13.8811	19.4886	7.65406	13.6746	9.0795	11.7571	10.0754	10.304
	PE(16:1/18:1)	C39H74N1O8P1	715.515	[M - H]-	[Acyl FA - H]-	714.5 > 253.2, 714.5 > 281.25	DEA-SFC/MS/MS	9.18±0.01	6.2496	9.69309	4.92121	6.95464	6.80272	6.21907	7.44747	6.82309
	PE(16:1/18:2)	C39H72N1O8P1	713.5	[M - H]-	[Acyl FA - H]-	712.5 > 253.2, 712.5 > 279.25	DEA-SFC/MS/MS	9.28±0	11.8455	13.9284	15.5677	13.7805	21.7178	14.2586	19.7239	18.5668
	PE(16:1/20:4)	C41H72N1O8P1	737.5	[M - H]-	[Acyl FA - H]-	736.5 > 253.2, 736.5 > 303.25	DEA-SFC/MS/MS	9.33±0	5.26786	7.7071	6.46632	6.48043	7.30235	7.81872	7.08732	7.4028
	PE(16:1/20:5)	C41H70N1O8P1	735.484	[M - H]-	[Acyl FA - H]-	734.5 > 253.2, 734.5 > 301.2	DEA-SFC/MS/MS	9.42±0	0.752031	2.62308	1.77527	1.71679	2.22641	0.773479	2.24208	1.74732
	PE(16:1/22:6)	C43H72N1O8P1	761.5	[M - H]-	[Acyl FA - H]-	760.5 > 253.2, 760.5 > 327.25	DEA-SFC/MS/MS	9.44±0	10.2719	14.7127	10.6561	11.8802	12.6494	12.3327	13.9227	12.9683
	PE(17:0/18:1)	C40H78N1O8P1	731.547	[M - H]-	[Acyl FA - H]-	730.55 > 269.25, 730.55 > 281.25	DEA-SFC/MS/MS	9.08±0.01	4.02092	4.06284	2.37345	3.48574	3.06844	3.46846	2.74394	3.09361
	PE(17:0/18:2)	C40H76N1O8P1	729.531	[M - H]-	[Acyl FA - H]-	728.5 > 269.25, 728.5 > 279.25	DEA-SFC/MS/MS	9.17±0	9.71544	11.054	13.067	11.2788	18.7751	19.1853	22.5152	20.1585
	PE(17:0/20:3)	C42H78N1O8P1	755.547	[M - H]-	[Acyl FA - H]-	754.55 > 269.25, 754.55 > 305.25	DEA-SFC/MS/MS	9.2±0	0.984079	3.18696	1.54117	1.90407	1.39513	3.11811	1.69827	2.0705
	PE(17:0/20:4)	C42H76N1O8P1	753.531	[M - H]-	[Acyl FA - H]-	752.5 > 269.25, 752.5 > 303.25	DEA-SFC/MS/MS	9.21±0	8.24419	14.1581	11.8131	11.4051	15.447	20.5534	13.2794	16.4266
	PE(17:0/20:5)	C42H74N1O8P1	751.515	[M - H]-	[Acyl FA - H]-	750.5 > 269.25, 750.5 > 301.2	DEA-SFC/MS/MS	9.3±0	1.47951	1.97737	0.887314	1.44807	2.85343	1.996	2.62407	2.49117
	PE(17:0/22:5)	C44H78N1O8P1	779.547	[M - H]-	[Acyl FA - H]-	778.55 > 269.25, 778.55 > 329.25	DEA-SFC/MS/MS	9.29±0.01	0.626188	1.12947	0.532203	0.762621	1.09044	0.529055	1.6118	1.0771
	PE(17:0/22:6)	C44H76N1O8P1	777.531	[M - H]-	[Acyl FA - H]-	776.5 > 269.25, 776.5 > 327.25	DEA-SFC/MS/MS	9.32±0	7.92872	9.64957	9.52086	9.03305	12.5151	13.7756	9.41466	11.9018
	PE(18:0/18:0)	C41H82N1O8P1	747.578	[M - H]-	[Acyl FA - H]-	746.55 > 283.25	DEA-SFC/MS/MS	9.25±0	2.13463	3.31172	2.48653	2.64429	2.38878	3.38546	3.26396	3.01273
	PE(18:0/18:1)	C41H80N1O8P1	745.562	[M - H]-	[Acyl FA - H]-	744.55 > 283.25, 744.55 > 281.25	DEA-SFC/MS/MS	9.05±0	122.769	144.387	95.0292	120.728	127.434	126.607	117.455	123.832
	PE(18:0/18:2)	C41H78N1O8P1	743.547	[M - H]-	[Acyl FA - H]-	742.55 > 283.25, 742.55 > 279.25	DEA-SFC/MS/MS	9.15±0	776.084	861.028	930.654	855.922	1479.09	1327.49	1270.33	1358.97
	PE(18:0/18:3)	C41H76N1O8P1	741.531	[M - H]-	[Acyl FA - H]-	740.5 > 283.25, 740.5 > 277.2	DEA-SFC/MS/MS	9.24±0.01	7.20067	7.80815	4.30559	6.43814	9.63055	7.50293	8.3145	8.48266
	PE(18:0/20:1)	C43H84N1O8P1	773.593	[M - H]-	[Acyl FA - H]-	772.6 > 283.25, 772.6 > 309.3	DEA-SFC/MS/MS	9.03±0.01	11.2043	17.3594	10.9054	13.1564	14.3945	15.5047	10.188	13.3624
	PE(18:0/20:2)	C43H82N1O8P1	771.578	[M - H]-	[Acyl FA - H]-	770.55 > 283.25, 770.55 > 307.25	DEA-SFC/MS/MS	9.17±0.02	8.50823	10.8343	7.42078	8.92112	7.07789	10.163	8.48715	8.57602
	PE(18:0/20:3)	C43H80N1O8P1	769.562	[M - H]-	[Acyl FA - H]-	768.55 > 283.25, 768.55 > 305.25	DEA-SFC/MS/MS	9.17±0	144.22	186.153	171.048	167.14	176.756	230.756	187.694	198.402
	PE(18:0/20:4)	C43H78N1O8P1	767.547	[M - H]-	[Acyl FA - H]-	766.55 > 283.25, 766.55 > 303.25	DEA-SFC/MS/MS	9.18±0	1012.61	1482.2	1115.46	1203.42	1245.88	1502.6	1396.88	1381.79
	PE(18:0/20:5)	C43H76N1O8P1	765.531	[M - H]-	[Acyl FA - H]-	764.5 > 283.25, 764.5 > 301.2	DEA-SFC/MS/MS	9.28±0	145.407	214.159	128.758	162.775	192.837	182.713	240.393	205.314
	PE(18:0/22:4)	C45H82N1O8P1	795.578	[M - H]-	[Acyl FA - H]-	794.55 > 283.25, 794.55 > 331.25	DEA-SFC/MS/MS	9.22±0.03	6.095	11.9997	6.903	8.33257	6.05556	7.82916	6.90379	6.9295
	PE(18:0/22:5)	C45H80N1O8P1	793.562	[M - H]-	[Acyl FA - H]-	792.55 > 283.25, 792.55 > 329.25	DEA-SFC/MS/MS	9.28±0	71.8843	111.639	76.9594	86.8277	85.7808	93.9862	88.6548	89.4739
	PE(18:0/22:6)	C45H78N1O8P1	791.547	[M - H]-	[Acyl FA - H]-	790.55 > 283.25, 790.55 > 327.25	DEA-SFC/MS/MS	9.29±0	477.549	663.776	571.056	570.794	726.719	744.117	685.455	718.764
	PE(18:1/18:1)	C41H78N1O8P1	743.547	[M - H]-	[Acyl FA - H]-	742.55 > 281.25	DEA-SFC/MS/MS	9.13±0	49.7685	55.5524	42.472	49.2643	51.1676	47.4442	41.1654	46.5924
	PE(18:1/18:2)	C41H76N1O8P1	741.531	[M - H]-	[Acyl FA - H]-	740.5 > 281.25, 740.5 > 279.25	DEA-SFC/MS/MS	9.23±0	269.316	342.223	357.639	323.059	526.534	425.765	451.139	467.813
	PE(18:1/18:3)	C41H74N1O8P1	739.515	[M - H]-	[Acyl FA - H]-	738.5 > 281.25, 738.5 > 277.2	DEA-SFC/MS/MS	9.32±0	4.68998	3.87435	6.21427	4.9262	5.74896	4.64386	8.17518	6.18934
	PE(18:1/20:1)	C43H82N1O8P1	771.578	[M - H]-	[Acyl FA - H]-	770.55 > 281.25, 770.55 > 309.3	DEA-SFC/MS/MS	9.11±0.01	5.38572	7.28272	5.54066	6.0697	5.07943	5.27101	5.343	5.23114
	PE(18:1/20:2)	C43H80N1O8P1	769.562	[M - H]-	[Acyl FA - H]-	768.55 > 281.25, 768.55 > 307.25	DEA-SFC/MS/MS	9.25±0.02	2.24206	3.36465	3.85211	3.15294	2.01722	3.31016	2.46641	2.59793
	PE(18:1/20:3)	C43H78N1O8P1	767.547	[M - H]-	[Acyl FA - H]-	766.55 > 281.25, 766.55 > 305.25	DEA-SFC/MS/MS	9.25±0	28.6785	56.561	47.7495	44.3297	42.622	55.1226	45.2756	47.6734
	PE(18:1/20:4)	C43H76N1O8P1	765.531	[M - H]-	[Acyl FA - H]-	764.5 > 281.25, 764.5 > 303.25	DEA-SFC/MS/MS	9.27±0	182.809	310.144	229.538	240.83	231.209	306.352	227.831	255.131
	PE(18:1/20:5)	C43H74N1O8P1	763.515	[M - H]-	[Acyl FA - H]-	762.5 > 281.25, 762.5 > 301.2	DEA-SFC/MS/MS	9.37±0	39.2118	67.178	43.7559	50.0486	50.3442	49.571	60.6656	53.5269
	PE(18:1/22:4)	C45H80N1O8P1	793.562	[M - H]-	[Acyl FA - H]-	792.55 > 281.25, 792.55 > 331.25	DEA-SFC/MS/MS	9.28±0.03	0.877465	1.37195	0.851803	1.03374	1.04841	1.34433	0.63683	1.00986
	PE(18:1/22:5)	C45H78N1O8P1	791.547	[M - H]-	[Acyl FA - H]-	790.55 > 281.25, 790.55 > 329.25	DEA-SFC/MS/MS	9.38±0	16.8168	27.4739	21.2362	21.8423	19.4879	21.3853	20.5566	20.4766
	PE(18:1/22:6)	C45H76N1O8P1	789.531	[M - H]-	[Acyl FA - H]-	788.5 > 281.25, 788.5 > 327.25	DEA-SFC/MS/MS	9.39±0	161.513	256.325	238.993	218.944	217.338	281.162	221.267	239.922
	PE(18:2/18:2)	C41H74N1O8P1	739.515	[M - H]-	[Acyl FA - H]-	738.5 > 279.25	DEA-SFC/MS/MS	9.33±0	18.8646	18.9843	30.1746	22.6745	62.0622	50.2167	46.6775	52.9854
	PE(18:2/18:3)	C41H72N1O8P1	737.5	[M - H]-	[Acyl FA - H]-	736.5 > 279.25, 736.5 > 277.2	DEA-SFC/MS/MS	9.43±0	3.31545	3.99582	5.11476	4.14201	10.2022	8.1502	9.86398	9.40546
	PE(18:2/20:0)	C43H82N1O8P1	771.578	[M - H]-	[Acyl FA - H]-	770.55 > 279.25, 770.55 > 311.3	DEA-SFC/MS/MS	9.1±0	4.60599	6.45234	17.6909	9.58308	27.6735	20.0897	11.8271	19.8634
	PE(18:2/20:1)	C43H80N1O8P1	769.562	[M - H]-	[Acyl FA - H]-	768.55 > 279.25, 768.55 > 309.3	DEA-SFC/MS/MS	9.2±0	5.6505	6.77368	13.2575	8.56055	15.4016	10.9487	6.86287	11.0711
	PE(18:2/20:2)	C43H78N1O8P1	767.547	[M - H]-	[Acyl FA - H]-	766.55 > 279.25, 766.55 > 307.25	DEA-SFC/MS/MS	9.3±0	1.50451	3.39033	5.20183	3.36556	6.46271	6.0714	6.11229	6.21547
	PE(18:2/20:3)	C43H76N1O8P1	765.531	[M - H]-	[Acyl FA - H]-	764.5 > 279.25, 764.5 > 305.25	DEA-SFC/MS/MS	9.35±0.01	2.45795	3.71391	6.3226	4.16482	6.04317	9.08677	5.88564	7.00519
	PE(18:2/20:4)	C43H74N1O8P1	763.515	[M - H]-	[Acyl FA - H]-	762.5 > 279.25, 762.5 > 303.25	DEA-SFC/MS/MS	9.37±0	13.2999	16.1108	16.4506	15.2871	18.63	25.0601	21.2728	21.6543
	PE(18:2/20:5)	C43H72N1O8P1	761.5	[M - H]-	[Acyl FA - H]-	760.5 > 279.25, 760.5 > 301.2	DEA-SFC/MS/MS	9.47±0	2.40857	4.60131	2.62788	3.21259	5.28855	6.15281	6.1115	5.85095
	PE(18:2/22:5)	C45H76N1O8P1	789.531	[M - H]-	[Acyl FA - H]-	788.5 > 279.25, 788.5 > 329.25	DEA-SFC/MS/MS	9.46±0.01	1.1807	2.50195	2.20348	1.96204	2.97863	3.50322	2.99915	3.16033
	PE(18:2/22:6)	C45H74N1O8P1	787.515	[M - H]-	[Acyl FA - H]-	786.5 > 279.25, 786.5 > 327.25	DEA-SFC/MS/MS	9.48±0	12.5648	14.9421	15.406	14.3043	21.8821	27.1015	23.8789	24.2875
	PE(18:3/20:4)	C43H72N1O8P1	761.5	[M - H]-	[Acyl FA - H]-	760.5 > 277.2, 760.5 > 303.25	DEA-SFC/MS/MS	9.48±0.01	0.376261	1.16996	0.851919	0.799381	0.377103	1.14384	1.53682	1.01925
	PE(18:3/22:6)	C45H72N1O8P1	785.5	[M - H]-	[Acyl FA - H]-	784.5 > 277.2, 784.5 > 327.25	DEA-SFC/MS/MS	9.58±0	0.42605	0.846974	0.923057	0.732027	2.05576	2.97476	2.24954	2.42669
	PE(20:0/20:4)	C45H82N1O8P1	795.578	[M - H]-	[Acyl FA - H]-	794.55 > 311.3, 794.55 > 303.25	DEA-SFC/MS/MS	9.14±0	2.75885	3.95421	13.3936	6.70222	9.38631	10.6663	6.23528	8.76262
	PE(20:0/22:6)	C47H82N1O8P1	819.578	[M - H]-	[Acyl FA - H]-	818.55 > 311.3, 818.55 > 327.25	DEA-SFC/MS/MS	9.25±0.01	0.275701	1.41276	4.51252	2.06699	4.11412	2.73113	1.9873	2.94418
	PE(20:1/20:4)	C45H80N1O8P1	793.562	[M - H]-	[Acyl FA - H]-	792.55 > 309.3, 792.55 > 303.25	DEA-SFC/MS/MS	9.24±0	3.7926	8.36479	7.14463	6.43401	7.68438	8.52614	4.76592	6.99215
	PE(20:1/20:5)	C45H78N1O8P1	791.547	[M - H]-	[Acyl FA - H]-	790.55 > 309.3, 790.55 > 301.2	DEA-SFC/MS/MS	9.31±0.01	1.17841	2.74442	1.99945	1.97409	2.51754	2.40317	2.99939	2.64003
	PE(20:1/22:6)	C47H80N1O8P1	817.562	[M - H]-	[Acyl FA - H]-	816.55 > 309.3, 816.55 > 327.25	DEA-SFC/MS/MS	9.35±0	2.05055	3.95533	6.35805	4.12131	4.53256	4.60419	2.51442	3.88372
	PE(20:2/20:4)	C45H78N1O8P1	791.547	[M - H]-	[Acyl FA - H]-	790.55 > 307.25, 790.55 > 303.25	DEA-SFC/MS/MS	9.34±0.01	0.726829	2.38081	2.37913	1.82892	2.47564	3.87045	3.22359	3.1899
	PE(20:3/20:4)	C45H76N1O8P1	789.531	[M - H]-	[Acyl FA - H]-	788.5 > 305.25, 788.5 > 303.25	DEA-SFC/MS/MS	9.4±0	0.902666	0.645319	0.852035	0.800007	0.971132	1.0179	1.16174	1.05026
	PE(20:4/20:4)	C45H74N1O8P1	787.515	[M - H]-	[Acyl FA - H]-	786.5 > 303.25	DEA-SFC/MS/MS	9.43±0.01	1.42952	1.5337	0.989445	1.31756	0.796921	1.86016	1.19948	1.28552
	15:0-18:1 (d7) PE	C38H67(D7)NO8P1	711.03	[M - H]-	[Acyl FA - H]-	709.55 > 288.3	DEA-SFC/MS/MS	9.11±0
	PE_Total								4951	7105.63	5997.54	6018.06	7406.58	7565.91	7258.66	7410.38
	PG(16:0/18:1)	C40H77O10P1	748.525	[M - H]-	[Acyl FA - H]-	747.5 > 255.25, 747.5 > 281.25	DEA-SFC/MS/MS	13.03±0	70.5764	82.9515	70.3177	74.6152	62.7004	69.6423	83.0122	71.785
	PG(16:0/18:2)	C40H75O10P1	746.51	[M - H]-	[Acyl FA - H]-	745.5 > 255.25, 745.5 > 279.25	DEA-SFC/MS/MS	13.14±0.01	18.8451	24.2553	23.4625	22.1876	26.4588	30.516	36.4787	31.1512
	PG(16:0/20:2)	C42H79O10P1	774.541	[M - H]-	[Acyl FA - H]-	773.55 > 255.25, 773.55 > 307.25	DEA-SFC/MS/MS	13.07±0.01	1.99071	3.18901	5.39156	3.52376	5.56795	7.63359	6.24173	6.48109
	PG(16:0/20:4)	C42H75O10P1	770.51	[M - H]-	[Acyl FA - H]-	769.5 > 255.25, 769.5 > 303.25	DEA-SFC/MS/MS	13.21±0.01	0.793236	1.07492	0.488086	0.785414	0.6483	0.695457	1.04933	0.797696
	PG(16:1/18:1)	C40H75O10P1	746.51	[M - H]-	[Acyl FA - H]-	745.5 > 253.2, 745.5 > 281.25	DEA-SFC/MS/MS	13.13±0.02	1.50129	2.15908	1.21838	1.62625	1.07986	1.02782	1.47454	1.19407
	PG(16:1/18:2)	C40H73O10P1	744.494	[M - H]-	[Acyl FA - H]-	743.5 > 253.2, 743.5 > 279.25	DEA-SFC/MS/MS	13.27±0.01	1.45651	2.11262	1.84073	1.80328	1.87725	1.92476	2.27018	2.02406
	PG(17:0/18:1)	C41H79O10P1	762.541	[M - H]-	[Acyl FA - H]-	761.55 > 269.25, 761.55 > 281.25	DEA-SFC/MS/MS	12.99±0.01	0.41891	0.469059	0.286506	0.391492	0.389611	0.796067	0.578885	0.588187
	PG(18:0/18:2)	C42H79O10P1	774.541	[M - H]-	[Acyl FA - H]-	773.55 > 283.25, 773.55 > 279.25	DEA-SFC/MS/MS	13.04±0	14.429	18.1688	15.9417	16.1798	21.3475	22.0819	22.0445	21.8246
	PG(18:1/18:2)	C42H77O10P1	772.525	[M - H]-	[Acyl FA - H]-	771.5 > 281.25, 771.5 > 279.25	DEA-SFC/MS/MS	12.83±0.01	4.60872	3.69175	5.86924	4.72323	3.46417	5.4641	4.39186	4.44005
	PG(18:1/22:6)	C46H77O10P1	820.525	[M - H]-	[Acyl FA - H]-	819.5 > 281.25, 819.5 > 327.25	DEA-SFC/MS/MS	13.04±0	7.09011	7.44346	7.78593	7.43983	4.72464	6.71414	5.66088	5.69988
	PG(18:2/18:3)	C42H73O10P1	768.494	[M - H]-	[Acyl FA - H]-	767.5 > 279.25, 767.5 > 277.2	DEA-SFC/MS/MS	13.44±0.01	0.195145	0.259503	0.286568	0.247072	0.304783	0.380415	0.578916	0.421372
	PG(18:2/20:2)	C44H79O10P1	798.541	[M - H]-	[Acyl FA - H]-	797.55 > 279.25, 797.55 > 307.25	DEA-SFC/MS/MS	13.23±0	0.268406	0.232079	0.528989	0.343158	0.680811	1.05735	0.597041	0.778401
	PG(18:2/20:3)	C44H77O10P1	796.525	[M - H]-	[Acyl FA - H]-	795.5 > 279.25, 795.5 > 305.25	DEA-SFC/MS/MS	13.3±0.01	0.618293	0.997488	0.75686	0.79088	0.555206	0.953482	0.678402	0.72903
	PG(18:2/22:6)	C46H75O10P1	818.51	[M - H]-	[Acyl FA - H]-	817.5 > 279.25, 817.5 > 327.25	DEA-SFC/MS/MS	13.17±0.01	4.29244	3.77373	5.79228	4.61949	5.99857	7.48221	6.0163	6.49903
	15:0-18:1 (d7) PG (Na Salt)	C39H67(D7)NaO10P1	764.02	[M - H]-	[Acyl FA - H]-	740.55 > 288.3	DEA-SFC/MS/MS	13.04±0.01
	PG_Total								127.084	150.778	139.967	139.276	135.798	156.37	171.073	154.414
	PI(16:0/16:1)	C41H77O13P1	808.51	[M - H]-	[Acyl FA - H]-	807.5 > 255.25, 807.5 > 253.2	DEA-SFC/MS/MS	17.05±0.02	1.77455	1.04701	0.860331	1.2273	1.0099	0.466314	0.575486	0.683899
	PI(16:0/18:1)	C43H81O13P1	836.541	[M - H]-	[Acyl FA - H]-	835.55 > 255.25, 835.55 > 281.25	DEA-SFC/MS/MS	16.95±0.03	13.4689	13.5011	11.5327	12.8342	13.6863	10.7559	12.3339	12.2587
	PI(16:0/18:2)	C43H79O13P1	834.526	[M - H]-	[Acyl FA - H]-	833.5 > 255.25, 833.5 > 279.25	DEA-SFC/MS/MS	17.06±0.01	55.0729	57.6926	60.9808	57.9154	71.4765	69.221	67.5283	69.4086
	PI(16:0/20:2)	C45H83O13P1	862.557	[M - H]-	[Acyl FA - H]-	861.55 > 255.25, 861.55 > 307.25	DEA-SFC/MS/MS	17.03±0.03	3.32875	3.32035	3.82943	3.49284	3.37234	2.95384	3.43257	3.25292
	PI(16:0/20:3)	C45H81O13P1	860.541	[M - H]-	[Acyl FA - H]-	859.55 > 255.25, 859.55 > 305.25	DEA-SFC/MS/MS	17.03±0	45.1459	62.7811	56.3034	54.7434	50.9	53.4132	59.7974	54.7035
	PI(16:0/20:4)	C45H79O13P1	858.526	[M - H]-	[Acyl FA - H]-	857.5 > 255.25, 857.5 > 303.25	DEA-SFC/MS/MS	17.09±0	116.03	155.687	94.9853	122.234	84.7096	102.269	117.289	101.422
	PI(16:0/20:5)	C45H77O13P1	856.51	[M - H]-	[Acyl FA - H]-	855.5 > 255.25, 855.5 > 301.2	DEA-SFC/MS/MS	17.21±0.01	5.6948	12.3825	5.34134	7.8062	7.42063	5.43	8.70648	7.1857
	PI(16:0/22:5)	C47H81O13P1	884.541	[M - H]-	[Acyl FA - H]-	883.55 > 255.25, 883.55 > 329.25	DEA-SFC/MS/MS	17.1±0.01	7.66203	13.7294	7.31971	9.5704	5.77598	4.91967	10.4428	7.04614
	PI(16:0/22:6)	C47H79O13P1	882.526	[M - H]-	[Acyl FA - H]-	881.5 > 255.25, 881.5 > 327.25	DEA-SFC/MS/MS	17.19±0.01	7.39919	10.7022	7.71696	8.60613	7.2446	8.55066	8.63114	8.14213
	PI(16:1/18:1)	C43H79O13P1	834.526	[M - H]-	[Acyl FA - H]-	833.5 > 253.2, 833.5 > 281.25	DEA-SFC/MS/MS	17.05±0.02	1.44054	1.76066	1.44157	1.54759	1.72805	0.50313	1.78043	1.3372
	PI(16:1/18:2)	C43H77O13P1	832.51	[M - H]-	[Acyl FA - H]-	831.5 > 253.2, 831.5 > 279.25	DEA-SFC/MS/MS	17.16±0.01	1.29939	1.22548	1.99272	1.50586	2.13119	0.988503	1.91004	1.67658
	PI(17:0/20:3)	C46H83O13P1	874.557	[M - H]-	[Acyl FA - H]-	873.55 > 269.25, 873.55 > 305.25	DEA-SFC/MS/MS	16.96±0.02	2.25312	2.58259	2.72746	2.52106	2.84591	4.07054	3.5585	3.49165
	PI(17:0/20:4)	C46H81O13P1	872.541	[M - H]-	[Acyl FA - H]-	871.55 > 269.25, 871.55 > 303.25	DEA-SFC/MS/MS	17.04±0.01	8.6897	9.82617	6.89964	8.47184	9.90092	12.0681	9.9608	10.6433
	PI(18:0/18:2)	C45H83O13P1	862.557	[M - H]-	[Acyl FA - H]-	861.55 > 283.25, 861.55 > 279.25	DEA-SFC/MS/MS	16.93±0	88.9303	82.6911	121.754	97.7918	142.389	149.95	115.073	135.804
	PI(18:0/18:3)	C45H81O13P1	860.541	[M - H]-	[Acyl FA - H]-	859.55 > 283.25, 859.55 > 277.2	DEA-SFC/MS/MS	17±0.03	1.80666	1.01096	0.843174	1.22026	1.52242	1.79895	1.03036	1.45058
	PI(18:0/20:3)	C47H85O13P1	888.573	[M - H]-	[Acyl FA - H]-	887.55 > 283.25, 887.55 > 305.25	DEA-SFC/MS/MS	16.91±0	366.15	404.919	447.416	406.162	440.989	537.829	482.5	487.106
	PI(18:0/20:4)	C47H83O13P1	886.557	[M - H]-	[Acyl FA - H]-	885.55 > 283.25, 885.55 > 303.25	DEA-SFC/MS/MS	16.97±0	1346.88	1639.16	1250.29	1412.11	1398.29	1836.47	1548.63	1594.46
	PI(18:0/20:5)	C47H81O13P1	884.541	[M - H]-	[Acyl FA - H]-	883.55 > 283.25, 883.55 > 301.2	DEA-SFC/MS/MS	17.08±0	71.0103	72.6848	44.8793	62.8581	69.628	63.9442	82.5097	72.0273
	PI(18:0/22:4)	C49H87O13P1	914.588	[M - H]-	[Acyl FA - H]-	913.6 > 283.25, 913.6 > 331.25	DEA-SFC/MS/MS	16.88±0	8.61309	14.0505	7.97489	10.2128	5.86944	9.41648	9.17898	8.15497
	PI(18:0/22:5)	C49H85O13P1	912.573	[M - H]-	[Acyl FA - H]-	911.55 > 283.25, 911.55 > 329.25	DEA-SFC/MS/MS	16.98±0.01	33.0061	39.8972	26.7916	33.2316	24.3233	24.6306	32.3998	27.1179
	PI(18:0/22:6)	C49H83O13P1	910.557	[M - H]-	[Acyl FA - H]-	909.55 > 283.25, 909.55 > 327.25	DEA-SFC/MS/MS	17.06±0	37.4264	45.8338	37.8323	40.3642	41.1096	45.1901	44.3615	43.5538
	PI(18:1/18:1)	C45H83O13P1	862.557	[M - H]-	[Acyl FA - H]-	861.55 > 281.25	DEA-SFC/MS/MS	16.92±0	10.1038	11.616	8.64941	10.1231	12.5231	11.8257	10.7546	11.7011
	PI(18:1/18:2)	C45H81O13P1	860.541	[M - H]-	[Acyl FA - H]-	859.55 > 281.25, 859.55 > 279.25	DEA-SFC/MS/MS	17.04±0	38.7867	37.2388	51.0949	42.3735	58.6285	61.4023	55.8955	58.6421
	PI(18:1/20:3)	C47H83O13P1	886.557	[M - H]-	[Acyl FA - H]-	885.55 > 281.25, 885.55 > 305.25	DEA-SFC/MS/MS	17.03±0.01	20.0798	22.2703	24.9105	22.4202	24.8894	25.664	28.0906	26.2147
	PI(18:1/20:4)	C47H81O13P1	884.541	[M - H]-	[Acyl FA - H]-	883.55 > 281.25, 883.55 > 303.25	DEA-SFC/MS/MS	17.09±0	57.4883	72.1567	53.6982	61.1144	53.8081	72.7933	64.5494	63.7169
	PI(18:1/20:5)	C47H79O13P1	882.526	[M - H]-	[Acyl FA - H]-	881.5 > 281.25, 881.5 > 301.2	DEA-SFC/MS/MS	17.21±0	4.10596	5.56191	3.34353	4.33713	4.70565	4.01759	4.9903	4.57118
	PI(18:2/20:3)	C47H81O13P1	884.541	[M - H]-	[Acyl FA - H]-	883.55 > 279.25, 883.55 > 305.25	DEA-SFC/MS/MS	17.15±0.05	0.263005	0.459081	0.506373	0.409486	0.660499	1.35977	0.551942	0.857403
	PI(20:0/20:4)	C49H87O13P1	914.588	[M - H]-	[Acyl FA - H]-	913.6 > 311.3, 913.6 > 303.25	DEA-SFC/MS/MS	16.86±0.01	1.17103	1.98218	6.82014	3.32445	6.31425	5.83926	3.78349	5.31233
	PI(20:1/20:4)	C49H85O13P1	912.573	[M - H]-	[Acyl FA - H]-	911.55 > 309.3, 911.55 > 303.25	DEA-SFC/MS/MS	16.98±0.02	0.65132	1.04418	1.09047	0.928656	1.49886	0.842978	0.677688	1.00651
	PI(20:4/20:4)	C49H79O13P1	906.526	[M - H]-	[Acyl FA - H]-	905.5 > 303.25	DEA-SFC/MS/MS	17.28±0.03	0.692933	0.579851	0.515924	0.596236	0.320513	0.728557	0.726526	0.591865
	15:0-18:1 (d7) PI (NH4 Salt)	C42H75(D7)NO13P1	847.13	[M - H]-	[Acyl FA - H]-	828.55 > 288.3, 828.55 > 241.2	DEA-SFC/MS/MS	16.63±0.01
	PITotal								2356.42	2799.4	2350.34	2502.05	2549.67	3129.31	2791.65	2823.54
	PS(18:0/18:2)	C42H78N1O10P1	787.536	[M - H]-	[Acyl FA - H]-	786.55 > 283.25, 786.55 > 279.25	DEA-SFC/MS/MS	17.37±0	127.714	82.9064	86.5734	99.0645	179.965	131.873	233.791	181.876
	PS(18:0/20:4)	C44H78N1O10P1	811.536	[M - H]-	[Acyl FA - H]-	810.55 > 283.25, 810.55 > 303.25	DEA-SFC/MS/MS	17.47±0.11	562.371	569.476	497.513	543.12	673.234	763.837	1090.86	842.643
	PS(18:0/22:6)	C46H78N1O10P1	835.536	[M - H]-	[Acyl FA - H]-	834.55 > 283.25, 834.55 > 327.25	DEA-SFC/MS/MS	17.53±0.02	657.918	662.033	550.089	623.347	939.403	902.263	1446.74	1096.13
	15:0-18:1 (d7) PS (Na Salt)	C39H66(D7)NNaO10P1	777.02	[M - H]-	[Acyl FA - H]-	753.55 > 288.3, 753.55 > 241.2	DEA-SFC/MS/MS	16.93±0.01
	PSTotal								1348	1314.42	1134.18	1265.53	1792.6	1797.97	2771.39	2120.65
	TG(46:0)	C49H94O6	778.705	[M + NH4]+	[M + NH4]+	796.75 > 796.75	DEA-SFC/MS/MS	4.06±0	46.9519	36.4293	31.1193	38.1669	38.9939	76.7891	56.8411	57.5414
	TG(48:1)	C51H96O6	804.721	[M + NH4]+	[M + NH4]+	822.75 > 822.75	DEA-SFC/MS/MS	3.5±0.07	4.79462	16.6469	12.2094	11.217	11.4615	154.231	66.6934	77.4619
	TG(48:2)	C51H94O6	802.705	[M + NH4]+	[M + NH4]+	820.75 > 820.75	DEA-SFC/MS/MS	3.55±0	12.0031	37.9788	22.3155	24.0991	25.8036	30.2195	66.2722	40.7651
	TG(48:3)	C51H92O6	800.689	[M + NH4]+	[M + NH4]+	818.7 > 818.7	DEA-SFC/MS/MS	3.59±0.02	25.0287	28.3614	31.0156	28.1352	17.5604	16.2068	19.3759	17.7143
	TG(50:0)	C53H102O6	834.768	[M + NH4]+	[M + NH4]+	852.8 > 852.8	DEA-SFC/MS/MS	3.59±0.02	57.8728	49.4802	57.7511	55.0347	65.0574	80.1065	76.6508	73.9382
	TG(50:1)	C53H100O6	832.752	[M + NH4]+	[M + NH4]+	850.8 > 850.8	DEA-SFC/MS/MS	3.59±0.01	365.235	337.677	366.223	356.378	399.551	470.851	474.856	448.419
	TG(50:2)	C53H98O6	830.736	[M + NH4]+	[M + NH4]+	848.75 > 848.75	DEA-SFC/MS/MS	3.61±0.01	289.32	368.01	382.047	346.459	335.229	325.342	401.934	354.168
	TG(50:3)	C53H96O6	828.721	[M + NH4]+	[M + NH4]+	846.75 > 846.75	DEA-SFC/MS/MS	3.63±0.01	108.991	170.905	180.613	153.503	102.481	88.7783	136.994	109.418
	TG(50:4)	C53H94O6	826.705	[M + NH4]+	[M + NH4]+	844.75 > 844.75	DEA-SFC/MS/MS	3.67±0	23.4787	39.5715	41.0183	34.6895	18.4044	16.2168	24.6725	19.7646
	TG(50:5)	C53H92O6	824.689	[M + NH4]+	[M + NH4]+	842.7 > 842.7	DEA-SFC/MS/MS	3.72±0.01	2.47062	5.43821	6.64743	4.85209	2.83834	3.1525	4.13879	3.37654
	TG(51:0)	C54H104O6	848.783	[M + NH4]+	[M + NH4]+	866.8 > 866.8	DEA-SFC/MS/MS	3.81±0.01	3.94424	7.2822	7.37118	6.1992	2.8734	4.56653	7.11444	4.85146
	TG(52:0)	C55H106O6	862.799	[M + NH4]+	[M + NH4]+	880.85 > 880.85	DEA-SFC/MS/MS	3.73±0.09	15.0777	24.1204	23.8531	21.0171	18.9449	21.1729	29.2358	23.1179
	TG(52:1)	C55H104O6	860.783	[M + NH4]+	[M + NH4]+	878.8 > 878.8	DEA-SFC/MS/MS	3.65±0	61.7048	82.0691	78.393	74.0556	95.9485	148.852	177.254	140.685
	TG(52:2)	C55H102O6	858.768	[M + NH4]+	[M + NH4]+	876.8 > 876.8	DEA-SFC/MS/MS	3.66±0.01	425.4	557.754	509.576	497.577	611.13	862.976	1033.99	836.033
	TG(52:3)	C55H100O6	856.752	[M + NH4]+	[M + NH4]+	874.8 > 874.8	DEA-SFC/MS/MS	3.71±0.01	619.433	1044.43	973.108	878.991	761.445	809.743	1102.1	891.097
	TG(52:4)	C55H98O6	854.736	[M + NH4]+	[M + NH4]+	872.75 > 872.75	DEA-SFC/MS/MS	3.73±0	459.412	760.255	777.257	665.641	462.394	336.915	532.936	444.082
	TG(52:5)	C55H96O6	852.721	[M + NH4]+	[M + NH4]+	870.75 > 870.75	DEA-SFC/MS/MS	3.76±0	107.146	197.864	215.795	173.602	106.423	83.0548	142.528	110.668
	TG(52:6)	C55H94O6	850.705	[M + NH4]+	[M + NH4]+	868.75 > 868.75	DEA-SFC/MS/MS	3.79±0	22.0278	36.9186	41.1365	33.361	20.2987	19.297	33.2439	24.2799
	TG(52:7)	C55H92O6	848.689	[M + NH4]+	[M + NH4]+	866.7 > 866.7	DEA-SFC/MS/MS	3.82±0.01	4.47863	7.03492	8.50837	6.67397	3.74441	4.41496	7.7244	5.29459
	TG(54:1)	C57H108O6	888.815	[M + NH4]+	[M + NH4]+	906.85 > 906.85	DEA-SFC/MS/MS	3.89±0	16.6206	31.3997	25.3286	24.4496	22.4577	28.286	34.2172	28.3203
	TG(54:2)	C57H106O6	886.799	[M + NH4]+	[M + NH4]+	904.85 > 904.85	DEA-SFC/MS/MS	3.74±0.01	37.8178	64.9261	53.2509	51.9983	63.0163	77.9182	109.592	83.509
	TG(54:3)	C57H104O6	884.783	[M + NH4]+	[M + NH4]+	902.8 > 902.8	DEA-SFC/MS/MS	3.75±0.01	115.848	171.051	155.082	147.327	193.417	227.682	293.724	238.274
	TG(54:4)	C57H102O6	882.768	[M + NH4]+	[M + NH4]+	900.8 > 900.8	DEA-SFC/MS/MS	3.78±0	256.097	413.294	363.945	344.445	361.844	276.261	432.82	356.975
	TG(54:5)	C57H100O6	880.752	[M + NH4]+	[M + NH4]+	898.8 > 898.8	DEA-SFC/MS/MS	3.81±0	301.603	527.933	480.418	436.651	320.08	220.979	374.895	305.318
	TG(54:6)	C57H98O6	878.736	[M + NH4]+	[M + NH4]+	896.75 > 896.75	DEA-SFC/MS/MS	3.83±0	229.83	389.982	363.457	327.756	209.002	184.846	310.372	234.74
	TG(54:7)	C57H96O6	876.721	[M + NH4]+	[M + NH4]+	894.75 > 894.75	DEA-SFC/MS/MS	3.85±0	113.209	199.082	200.832	171.041	109.475	107.62	181.563	132.886
	TG(54:8)	C57H94O6	874.705	[M + NH4]+	[M + NH4]+	892.75 > 892.75	DEA-SFC/MS/MS	3.87±0	29.2395	46.7585	52.1011	42.6997	26.5543	28.5277	45.2926	33.4582
	TG(56:1)	C59H112O6	916.846	[M + NH4]+	[M + NH4]+	934.9 > 934.9	DEA-SFC/MS/MS	3.94±0	15.8571	24.3437	23.5722	21.2576	16.8352	14.6435	20.6936	17.3908
	TG(56:10)	C59H94O6	898.705	[M + NH4]+	[M + NH4]+	916.75 > 916.75	DEA-SFC/MS/MS	3.97±0.01	20.4262	38.089	32.8597	30.4583	18.3159	15.052	25.1654	19.5111
	TG(56:2)	C59H110O6	914.83	[M + NH4]+	[M + NH4]+	932.85 > 932.85	DEA-SFC/MS/MS	3.94±0.04	16.1641	24.012	24.7394	21.6385	21.5651	14.5306	22.121	19.4055
	TG(56:3)	C59H108O6	912.815	[M + NH4]+	[M + NH4]+	930.85 > 930.85	DEA-SFC/MS/MS	3.89±0.08	19.9588	34.262	30.0439	28.0883	33.9347	23.9364	31.5207	29.7972
	TG(56:4)	C59H106O6	910.799	[M + NH4]+	[M + NH4]+	928.85 > 928.85	DEA-SFC/MS/MS	3.82±0.01	30.1495	49.8495	43.1145	41.0379	53.6369	33.0809	50.2599	45.6592
	TG(56:5)	C59H104O6	908.783	[M + NH4]+	[M + NH4]+	926.8 > 926.8	DEA-SFC/MS/MS	3.85±0.01	46.4207	86.4593	64.3604	65.7468	71.9259	66.4787	86.7005	75.035
	TG(56:6)	C59H102O6	906.768	[M + NH4]+	[M + NH4]+	924.8 > 924.8	DEA-SFC/MS/MS	3.86±0	127.664	230.274	174.204	177.381	175.814	207.631	261.456	214.967
	TG(56:7)	C59H100O6	904.752	[M + NH4]+	[M + NH4]+	922.8 > 922.8	DEA-SFC/MS/MS	3.88±0	326.76	567.534	499.521	464.605	362.479	419.836	520.379	434.231
	TG(56:8)	C59H98O6	902.736	[M + NH4]+	[M + NH4]+	920.75 > 920.75	DEA-SFC/MS/MS	3.9±0	384.192	690.444	659.945	578.193	360.773	342.649	502.35	401.924
	TG(56:9)	C59H96O6	900.721	[M + NH4]+	[M + NH4]+	918.75 > 918.75	DEA-SFC/MS/MS	3.93±0	110.104	185.603	180.18	158.629	103.807	85.8246	131.223	106.952
	TG(58:10)	C61H98O6	926.736	[M + NH4]+	[M + NH4]+	944.75 > 944.75	DEA-SFC/MS/MS	4±0.01	174.178	343.864	316.763	278.268	148.895	86.3013	142.005	125.733
	TG(58:11)	C61H96O6	924.721	[M + NH4]+	[M + NH4]+	942.75 > 942.75	DEA-SFC/MS/MS	4.03±0	60.3921	121.774	107.691	96.6189	48.0453	35.434	59.0957	47.525
	TG(58:12)	C61H94O6	922.705	[M + NH4]+	[M + NH4]+	940.75 > 940.75	DEA-SFC/MS/MS	4.05±0.01	13.7218	21.2365	21.8484	18.9356	10.6338	10.2097	15.4694	12.1043
	TG(58:2)	C61H114O6	942.862	[M + NH4]+	[M + NH4]+	960.9 > 960.9	DEA-SFC/MS/MS	3.99±0.01	3.96241	6.31533	7.69126	5.98966	5.69218	3.80216	6.33668	5.27701
	TG(58:3)	C61H112O6	940.846	[M + NH4]+	[M + NH4]+	958.9 > 958.9	DEA-SFC/MS/MS	4.02±0.01	4.5392	8.10738	8.70027	7.11562	7.06803	5.12042	6.05273	6.08039
	TG(58:4)	C61H110O6	938.83	[M + NH4]+	[M + NH4]+	956.85 > 956.85	DEA-SFC/MS/MS	4.02±0.02	6.14816	10.8456	8.81261	8.60211	8.84916	6.27266	10.1633	8.42839
	TG(58:5)	C61H108O6	936.815	[M + NH4]+	[M + NH4]+	954.85 > 954.85	DEA-SFC/MS/MS	3.95±0.06	7.8136	14.9101	12.187	11.6369	12.6443	10.7689	14.7926	12.7353
	TG(58:6)	C61H106O6	934.799	[M + NH4]+	[M + NH4]+	952.85 > 952.85	DEA-SFC/MS/MS	3.92±0	16.3899	32.0864	24.4156	24.2973	25.133	24.3424	33.6553	27.7102
	TG(58:7)	C61H104O6	932.783	[M + NH4]+	[M + NH4]+	950.8 > 950.8	DEA-SFC/MS/MS	3.94±0	57.6086	103.9	77.6287	79.7126	78.5576	72.7688	103.114	84.8134
	TG(58:8)	C61H102O6	930.768	[M + NH4]+	[M + NH4]+	948.8 > 948.8	DEA-SFC/MS/MS	3.96±0	174.294	293.895	237.254	235.148	183.832	165.57	234.47	194.624
	TG(58:9)	C61H100O6	928.752	[M + NH4]+	[M + NH4]+	946.8 > 946.8	DEA-SFC/MS/MS	3.98±0.01	254.833	487.691	399.575	380.699	256.184	168.857	275.969	233.67
	TG(60:10)	C63H102O6	954.768	[M + NH4]+	[M + NH4]+	972.8 > 972.8	DEA-SFC/MS/MS	4.04±0	32.8223	74.0884	56.8575	54.5894	38.3027	32.629	39.2221	36.7179
	TG(60:11)	C63H100O6	952.752	[M + NH4]+	[M + NH4]+	970.8 > 970.8	DEA-SFC/MS/MS	4.05±0	58.9651	121.547	80.7782	87.0966	52.2996	52.2065	62.6317	55.7126
	TG(60:12)	C63H98O6	950.736	[M + NH4]+	[M + NH4]+	968.75 > 968.75	DEA-SFC/MS/MS	4.07±0.01	61.7034	129.932	90.41	94.0153	48.5114	46.7624	59.0499	51.4413
	TG(60:13)	C63H96O6	948.721	[M + NH4]+	[M + NH4]+	966.75 > 966.75	DEA-SFC/MS/MS	4.1±0	28.4111	53.2048	47.1875	42.9345	21.2028	18.4917	25.1087	21.6011
	TG(60:4)	C63H114O6	966.862	[M + NH4]+	[M + NH4]+	984.9 > 984.9	DEA-SFC/MS/MS	4.07±0.01	1.74365	4.45061	2.85547	3.01657	1.97697	1.66409	2.78476	2.14194
	TG(60:6)	C63H110O6	962.83	[M + NH4]+	[M + NH4]+	980.85 > 980.85	DEA-SFC/MS/MS	4.12±0	4.16941	9.7191	7.18859	7.0257	6.82672	5.12131	5.65062	5.86622
	TG(60:7)	C63H108O6	960.815	[M + NH4]+	[M + NH4]+	978.85 > 978.85	DEA-SFC/MS/MS	4.01±0.05	6.69647	13.8372	9.86235	10.132	11.3876	7.37231	9.35977	9.37323
	TG(60:8)	C63H106O6	958.799	[M + NH4]+	[M + NH4]+	976.85 > 976.85	DEA-SFC/MS/MS	4±0.01	12.788	31.7648	26.3317	23.6282	20.7374	14.0624	17.6296	17.4765
	TG(60:9)	C63H104O6	956.783	[M + NH4]+	[M + NH4]+	974.8 > 974.8	DEA-SFC/MS/MS	4.03±0	18.5564	43.6786	32.9097	31.7149	26.3319	18.7911	25.4691	23.5307
	TG(62:10)	C65H106O6	982.799	[M + NH4]+	[M + NH4]+	1000.8 > 1000.8	DEA-SFC/MS/MS	4.09±0.02	3.76584	11.9735	8.71362	8.15099	6.04462	4.30023	5.08964	5.14483
	TG(62:11)	C65H104O6	980.783	[M + NH4]+	[M + NH4]+	998.8 > 998.8	DEA-SFC/MS/MS	4.11±0.01	9.11981	21.0308	14.5412	14.8973	9.13911	9.392	11.5653	10.0321
	TG(62:12)	C65H102O6	978.768	[M + NH4]+	[M + NH4]+	996.8 > 996.8	DEA-SFC/MS/MS	4.12±0.01	23.7631	52.6278	39.9433	38.7781	22.9434	20.9491	20.9278	21.6068
	TG(62:13)	C65H100O6	976.752	[M + NH4]+	[M + NH4]+	994.8 > 994.8	DEA-SFC/MS/MS	4.14±0	43.3724	98.6762	74.735	72.2612	36.5001	25.7753	34.4177	32.231
	TG(62:14)	C65H98O6	974.736	[M + NH4]+	[M + NH4]+	992.75 > 992.75	DEA-SFC/MS/MS	4.1±0.11	28.5863	77.1408	50.7498	52.159	23.5755	12.9398	18.6238	18.3797
	TG(62:8)	C65H110O6	986.83	[M + NH4]+	[M + NH4]+	1004.8 > 1004.8	DEA-SFC/MS/MS	4.03±0.02	0.660182	1.69997	1.64185	1.334	1.65422	1.10459	1.82429	1.5277
	TG(62:9)	C65H108O6	984.815	[M + NH4]+	[M + NH4]+	1002.8 > 1002.8	DEA-SFC/MS/MS	4.07±0.01	1.74715	5.95938	4.3071	4.00454	2.93817	2.30579	3.17334	2.80577
	TG(64:11)	C67H108O6	1008.81	[M + NH4]+	[M + NH4]+	1026.8 > 1026.8	DEA-SFC/MS/MS	4.12±0.02	0.93004	2.58534	1.19475	1.57004	1.23159	0.892764	2.01185	1.37873
	TG(64:12)	C67H106O6	1006.8	[M + NH4]+	[M + NH4]+	1024.8 > 1024.8	DEA-SFC/MS/MS	4.16±0.01	1.58317	4.64347	3.35596	3.1942	1.93669	0.934364	2.17611	1.68239
	TG(64:13)	C67H104O6	1004.78	[M + NH4]+	[M + NH4]+	1022.8 > 1022.8	DEA-SFC/MS/MS	4.18±0.01	2.05067	7.46368	3.50465	4.33966	3.40494	1.53922	1.67108	2.20508
	TG(64:14)	C67H102O6	1002.77	[M + NH4]+	[M + NH4]+	1020.8 > 1020.8	DEA-SFC/MS/MS	4.2±0.01	1.40805	6.67568	3.24152	3.77509	1.61915	1.38163	1.2035	1.40143
	TG(64:15)	C67H100O6	1000.75	[M + NH4]+	[M + NH4]+	1018.8 > 1018.8	DEA-SFC/MS/MS	4.23±0.01	0.992841	4.04083	2.18498	2.40622	0.642908	0.73986	1.47246	0.951742
	15:0-18:1 (d7)-15:0 TG	C51H89(D7)O6	812.37	[M + NH4]+	[M + NH4]+	829.8 > 523.45, 829.8 > 570.55	DEA-SFC/MS/MS	3.3±0.04
	TGTotal								5968.04	9794.17	8972.55	8244.92	6748	6795.35	9078.42	7540.59
	HexCer(d18:1/16:0)	C40H77N1O8	699.565	[M + H]+	[C18H34N]+ (264.3)	700.55 > 264.25	DEA-SFC/MS/MS	7.75±0.02	52.9596	85.5794	55.1362	64.5584	39.7782	84.7134	85.2809	69.9242
	HexCer(d18:1/22:0)	C46H89N1O8	783.659	[M + H]+	[C18H34N]+ (264.3)	784.65 > 264.25	DEA-SFC/MS/MS	7.68±0	129.633	120.549	141.853	130.678	97.6018	130.581	143.378	123.853
	HexCer(d18:1/24:0)	C48H93N1O8	811.69	[M + H]+	[C18H34N]+ (264.3)	812.7 > 264.25	DEA-SFC/MS/MS	7.65±0	78.309	89.3256	61.4677	76.3674	49.0266	82.7432	95.8474	75.8724
	18:1-d18:1 (d5) GlcCer	C42H74(D5)NO8	730.611	[M + H]+	[C18H34N]+ (264.3)	729.6 > 567.55	DEA-SFC/MS/MS	7.77±0
	HexCerTotal								260.901	295.454	258.457	271.604	186.407	298.038	324.506	269.65
	SM(d18:1/16:0)	C39H79N2O6P1	702.568	[M + H]+	[C5H15O4NP]+ (184.1)	703.55 > 184.05	DEA-SFC/MS/MS	8.28±0	163.615	183.039	156.538	167.731	138.428	186.426	180.575	168.476
	SM(d18:1/18:0)	C41H83N2O6P1	730.599	[M + H]+	[C5H15O4NP]+ (184.1)	731.6 > 184.05	DEA-SFC/MS/MS	8.25±0	37.4249	34.3721	18.9848	30.2606	19.2285	24.7396	28.7979	24.2553
	SM(d18:1/20:0)	C43H87N2O6P1	758.63	[M + H]+	[C5H15O4NP]+ (184.1)	759.65 > 184.05	DEA-SFC/MS/MS	8.21±0	44.0675	47.5354	55.9672	49.19	50.735	56.1601	54.6558	53.8503
	SM(d18:1/22:0)	C45H91N2O6P1	786.661	[M + H]+	[C5H15O4NP]+ (184.1)	787.65 > 184.05	DEA-SFC/MS/MS	8.18±0	238.151	266.788	325.242	276.727	293.275	297.671	286.264	292.404
	SM(d18:1/22:1)	C45H89N2O6P1	784.646	[M + H]+	[C5H15O4NP]+ (184.1)	785.65 > 184.05	DEA-SFC/MS/MS	8.27±0.02	23.3772	27.8327	42.1377	31.1159	33.2038	35.6025	29.4295	32.7453
	SM(d18:1/24:0)	C47H95N2O6P1	814.693	[M + H]+	[C5H15O4NP]+ (184.1)	815.7 > 184.05	DEA-SFC/MS/MS	8.15±0	232.159	255.857	206.138	231.385	208.094	248.757	234.461	230.437
	d18:1-18:1 (d9) SM	C41H72(D9)N2O6P1	738.12	[M + H]+	[C5H15O4NP]+ (184.1)	738.65 > 184.05	DEA-SFC/MS/MS	8.17
	SMTotal								738.794	815.425	805.008	786.409	742.964	849.356	814.184	802.168

## Sheet: Table S8
	Table S8. Enzyme expression level associated with each metabolic reaction
	Metabolic pathway	Reaction	Accession	Gene name	Gene symbol	Peak area
						Control			Pg
						1	2	3	1	2	3
	Glycolysis	D-Glucose → D-Glucose 6-phosphate	HXK4_MOUSE	Glucokinase	Gck	434621	472754	396794	434866	424970	444548
		D-Glucose 6-phosphate ↔ D-Fructose 6-phosphate	G6PI_MOUSE	Glucose-6-phosphate isomerase	Gpi1	3.52839e+06	3.89311e+06	3.36193e+06	2.87691e+06	2.66871e+06	3.02619e+06
		D-Fructose 6-phosphate → D-Fructose 1,6-bisphosphate	PFKAL_MOUSE	ATP-dependent 6-phosphofructokinase, liver type	Pfkl	137704	127431	127728	112034	120388	85616.4
			PFKAM_MOUSE	ATP-dependent 6-phosphofructokinase, muscle type	Pfkm	269044	249025	323878	233103	231953	243060
			PFKAP_MOUSE	ATP-dependent 6-phosphofructokinase, platelet type	Pfkp	572129	650956	748488	727789	637007	618494
			Q8C605_MOUSE	ATP-dependent 6-phosphofructokinase	Pfkp	97864	106172	30394.7	108859	115224	89428.7
		D-Fructose 1,6-bisphosphate ↔ Glyceraldehyde 3-phosphate + Dihydroxyacetone phosphate	ALDOA_MOUSE	Fructose-bisphosphate aldolase A	Aldoa	1.30104e+06	1.44254e+06	1.18353e+06	1.58371e+06	1.60053e+06	1.64219e+06
			ALDOB_MOUSE	Fructose-bisphosphate aldolase B	Aldob	7.44558e+07	9.03149e+07	6.00808e+07	6.6091e+07	6.66365e+07	7.54517e+07
			ALDOC_MOUSE	Fructose-bisphosphate aldolase C	Aldoc	119391	101637	121091	122652	131347	77838.7
			A6ZI46_MOUSE	Fructose-bisphosphate aldolase	Aldoart1	100963	117878	155108	93457.3	100682	119464
		Glyceraldehyde 3-phosphate ↔ Dihydroxyacetone phosphate	TPIS_MOUSE	Triosephosphate isomerase	Tpi1	8.908e+06	9.58887e+06	8.67204e+06	8.75521e+06	8.73224e+06	9.47353e+06
			H7BXC3_MOUSE	Triosephosphate isomerase	Tpi1	53842.6	80778.3	93584.4	667552	372650	782532
		Glyceraldehyde 3-phosphate → 1,3-Bisphosphoglycerate	A0A0A0MQF6_MOUSE	Glyceraldehyde-3-phosphate dehydrogenase	Gapdh	2.51517e+07	2.51644e+07	2.27574e+07	2.35934e+07	2.16577e+07	2.90985e+07
		1,3-Bisphosphoglycerate ↔ 3-Phospho-D-glyceric acid	PGK1_MOUSE	Phosphoglycerate kinase 1	Pgk1	1.76356e+07	1.84408e+07	1.81245e+07	1.87982e+07	1.75477e+07	2.2241e+07
		3-Phospho-D-glyceric acid ↔ 2-Phospho-D-glyceric acid	PGAM1_MOUSE	Phosphoglycerate mutase 1	Pgam1	5.22855e+06	5.43128e+06	5.93612e+06	6.17938e+06	5.62835e+06	7.0728e+06
			PMGE_MOUSE	Bisphosphoglycerate mutase	Bpgm	490597	353588	376798	284411	323454	227450
		2-Phospho-D-glyceric acid ↔ Phosphoenolpyruvic acid	ENOA_MOUSE	Alpha-enolase	Eno1	2.57918e+07	2.70345e+07	2.66317e+07	2.5244e+07	2.3877e+07	2.69126e+07
			B1ARR7_MOUSE	Alpha-enolase (Fragment)	Eno1	1.0766e+06	1.30081e+06	530775	1.88288e+06	1.48579e+06	2.2039e+06
			A0A0N4SUX5_MOUSE	Gamma-enolase	Eno2	34697.2	32371.4	48224.2	37430.1	35952.9	49931.1
		Phosphoenolpyruvic acid → Pyruvic acid	KPYM_MOUSE	Pyruvate kinase PKM	Pkm	856753	879309	803807	804136	892591	780414
			G3X925_MOUSE	Pyruvate kinase	Pklr	3.63696e+06	4.17276e+06	5.28492e+06	2.16756e+06	2.05022e+06	3.26941e+06
			KPYR_MOUSE	Pyruvate kinase PKLR	Pklr	7.27658e+06	8.1608e+06	7.89474e+06	5.25092e+06	4.98102e+06	6.75915e+06
			Q3UEI4_MOUSE	Pyruvate kinase (Fragment)	Pklr	1.08281e+06	1.58708e+06	900396	1.84727e+06	1.64583e+06	2.5949e+06
		Pyruvic acid ↔ Lactic acid	A0A1B0GSX0_MOUSE	L-lactate dehydrogenase	Ldha	5.54767e+06	5.97944e+06	5.49733e+06	2.78038e+06	3.28825e+06	3.0993e+06
		Pyruvic acid → Acetyl-CoA	ODPA_MOUSE	Pyruvate dehydrogenase E1 component subunit alpha, somatic form, mitochondrial	Pdha1	2.88322e+06	3.14908e+06	2.33012e+06	2.72154e+06	2.71052e+06	2.64591e+06
			Q9D9X9_MOUSE	Pyruvate dehydrogenase E1 component subunit alpha	Pdha2	30747.3	32319.3	38725.6	34236.8	35012.7	32920.8
			ODPB_MOUSE	Pyruvate dehydrogenase E1 component subunit beta, mitochondrial	Pdhb	3.85009e+06	3.75966e+06	3.38504e+06	2.2823e+06	2.11436e+06	2.10656e+06
			ODP2_MOUSE	Dihydrolipoyllysine-residue acetyltransferase component of pyruvate dehydrogenase complex, mitochondrial	Dlat	2.37147e+06	2.6112e+06	2.0558e+06	1.89426e+06	1.93335e+06	1.86719e+06
	Fructose metabolism	D-Glucose ↔ D-Sorbitol	ALDR_MOUSE	Aldo-keto reductase family 1, member B3 (aldose reductase)	Akrb3	n.d.	n.d.	n.d.	n.d.	n.d.	n.d.
		D-Sorbitol ↔ D-Fructose	DHSO_MOUSE	Sorbitol dehydrogenase	Sord	2.47853e+07	2.49412e+07	1.71675e+07	2.42202e+07	2.43482e+07	2.63151e+07
		D-Fructose →D-Fructose 1-phosphate	A0A0J9YU79_MOUSE	Ketohexokinase	Khk	3.20426e+06	3.36445e+06	3.34459e+06	2.19591e+06	2.06251e+06	2.75565e+06
			A0A0J9YTU1_MOUSE	Ketohexokinase (Fragment)	Khk	3.56406e+06	3.8882e+06	3.39469e+06	3.46975e+06	3.23737e+06	4.24743e+06
			A0A0J9YUK6_MOUSE	Ketohexokinase (Fragment)	Khk	807303	1.23849e+06	749755	1.83108e+06	1.65352e+06	2.43245e+06
		D-Fructose 1-phosphate ↔ Dihydroxyacetone phosphate	ALDOA_MOUSE	Fructose-bisphosphate aldolase A	Aldoa	1.30104e+06	1.44254e+06	1.18353e+06	1.58371e+06	1.60053e+06	1.64219e+06
			ALDOB_MOUSE	Fructose-bisphosphate aldolase B	Aldob	7.44558e+07	9.03149e+07	6.00808e+07	6.6091e+07	6.66365e+07	7.54517e+07
			ALDOC_MOUSE	Fructose-bisphosphate aldolase C	Aldoc	119391	101637	121091	122652	131347	77838.7
			A6ZI46_MOUSE	Fructose-bisphosphate aldolase	Aldoart1	100963	117878	155108	93457.3	100682	119464
	TCA cycle	Acetyl-CoA + Oxaloacetic acid↔Citrate	ACLY_MOUSE	ATP-citrate synthase	Acly	8.14549e+06	1.30098e+07	5.77524e+06	3.76148e+06	3.70831e+06	4.19146e+06
			Q3UEA1_MOUSE	Uncharacterized protein (Fragment)	Acly	1.05441e+06	1.91567e+06	1.60359e+06	151964	180568	316839
			CISY_MOUSE	Citrate synthase, mitochondrial	Cs	6.36911e+06	6.8507e+06	6.10267e+06	5.70004e+06	5.55995e+06	5.67202e+06
		Citric acid ↔ cis-Aconitate	ACOC_MOUSE	Cytoplasmic aconitate hydratase	Aco1	1.10563e+07	1.03431e+07	9.58848e+06	1.0114e+07	9.73608e+06	1.02545e+07
			ACON_MOUSE	Aconitate hydratase, mitochondrial	Aco2	1.16706e+07	1.03268e+07	1.13392e+07	9.65952e+06	1.02926e+07	9.9073e+06
		cis-Aconitate ↔ Isocitric acid	ACOC_MOUSE	Cytoplasmic aconitate hydratase	Aco1	1.10563e+07	1.03431e+07	9.58848e+06	1.0114e+07	9.73608e+06	1.02545e+07
			ACON_MOUSE	Aconitate hydratase, mitochondrial	Aco2	1.16706e+07	1.03268e+07	1.13392e+07	9.65952e+06	1.02926e+07	9.9073e+06
		Isocitric acid ↔ Oxalosuccinate	IDHC_MOUSE	Isocitrate dehydrogenase [NADP] cytoplasmic	Idh1	1.57795e+07	1.61406e+07	1.57093e+07	1.12847e+07	1.13671e+07	1.29486e+07
			Q3TJ51_MOUSE	Isocitrate dehydrogenase [NADP]	Idh1	32923.3	31555	43491	40856.8	33162.6	81134.6
			Q0QER9_MOUSE	Isocitrate dehydrogenase 1 (Fragment)	Idh1	2.17209e+06	2.8441e+06	1.68575e+06	4.04759e+06	3.71734e+06	4.97702e+06
			IDHP_MOUSE	Isocitrate dehydrogenase [NADP], mitochondrial	Idh2	9.25756e+06	8.86163e+06	8.70269e+06	7.80285e+06	8.15651e+06	8.30783e+06
		Oxalosuccinate ↔ 2-Ketoglutaric acid	IDHC_MOUSE	Isocitrate dehydrogenase [NADP] cytoplasmic	Idh1	1.57795e+07	1.61406e+07	1.57093e+07	1.12847e+07	1.13671e+07	1.29486e+07
			Q3TJ51_MOUSE	Isocitrate dehydrogenase [NADP]	Idh1	32923.3	31555	43491	40856.8	33162.6	81134.6
			Q0QER9_MOUSE	Isocitrate dehydrogenase 1 (Fragment)	Idh1	2.17209e+06	2.8441e+06	1.68575e+06	4.04759e+06	3.71734e+06	4.97702e+06
			IDHP_MOUSE	Isocitrate dehydrogenase [NADP], mitochondrial	Idh2	9.25756e+06	8.86163e+06	8.70269e+06	7.80285e+06	8.15651e+06	8.30783e+06
		Isocitric acid ↔ 2-Ketoglutaric acid	IDH3A_MOUSE	Isocitrate dehydrogenase [NAD] subunit alpha, mitochondrial	Idh3a	893997	785113	913750	914403	917749	748748
			A0A1L1STE6_MOUSE	Isocitrate dehydrogenase [NAD] subunit, mitochondrial	Idh3a	261857	273961	283925	374813	387665	340676
			Q91VA7_MOUSE	Isocitrate dehydrogenase [NAD] subunit, mitochondrial	Idh3b	924555	848462	951820	1.04483e+06	984069	906759
			Q3TKM5_MOUSE	Isocitrate dehydrogenase [NAD] subunit, mitochondrial	Idh3g	195607	186161	116646	245190	246517	160042
		2-Ketoglutaric acid ↔ Succinyl-CoA	ODO1_MOUSE	2-oxoglutarate dehydrogenase, mitochondrial	Ogdh	3.61935e+06	3.44337e+06	3.95293e+06	3.96838e+06	3.87794e+06	3.29752e+06
			ODO2_MOUSE	Dihydrolipoyllysine-residue succinyltransferase component of 2-oxoglutarate dehydrogenase complex, mitochondrial	Dlst	2.9801e+06	2.82482e+06	2.77059e+06	2.76165e+06	3.08868e+06	2.8744e+06
		Succinyl-CoA ↔ Succinic acid	SUCB1_MOUSE	Succinate--CoA ligase [ADP-forming] subunit beta, mitochondrial	Sucla2	6.55221e+06	6.49478e+06	6.46796e+06	6.73511e+06	6.67826e+06	6.74057e+06
			SUCA_MOUSE	Succinate--CoA ligase [ADP/GDP-forming] subunit alpha, mitochondrial	Suclg1	5.69715e+06	5.921e+06	5.74235e+06	6.91602e+06	6.88937e+06	7.73677e+06
			SUCB2_MOUSE	Succinate--CoA ligase [GDP-forming] subunit beta, mitochondrial	Suclg2	8.55301e+06	8.7659e+06	9.27329e+06	8.32697e+06	8.55751e+06	8.10657e+06
		Succinate ↔ Fumaric acid	SDHA_MOUSE	Succinate dehydrogenase [ubiquinone] flavoprotein subunit, mitochondrial	Sdha	1.22659e+07	1.26206e+07	1.08095e+07	1.38242e+07	1.34982e+07	1.20703e+07
			SDHB_MOUSE	Succinate dehydrogenase [ubiquinone] iron-sulfur subunit, mitochondrial	Sdhb	1.92531e+06	1.85652e+06	1.88411e+06	2.28951e+06	1.86929e+06	1.99411e+06
			Q0QEZ4_MOUSE	Succinate dehydrogenase [ubiquinone] iron-sulfur subunit, mitochondrial (Fragment)	Sdhb	2.783e+06	3.07544e+06	2.93447e+06	3.19048e+06	2.96038e+06	3.41071e+06
			Q5XK33_MOUSE	Succinate dehydrogenase complex, subunit C, integral membrane protein	Sdhc	1.43818e+06	1.32302e+06	1.58547e+06	773279	790037	863083
		Fumaric acid ↔ Malic acid	H3BKG7_MOUSE	Fumarate hydratase 1 (Fragment)	Fh1	7344.66	5072.85	7369.65	14484	9879.55	10751.9
		Malic acid ↔ Oxaloacetic acid	MDHC_MOUSE	Malate dehydrogenase, cytoplasmic	Mdh1	2.02294e+07	2.12088e+07	1.8482e+07	2.08085e+07	2.09099e+07	2.31313e+07
			A0A0G2JGY4_MOUSE	Malate dehydrogenase (Fragment)	Mdh2	416599	424454	604042	375262	369215	390129
			MDHM_MOUSE	Malate dehydrogenase, mitochondrial	Mdh2	1.57557e+07	1.63818e+07	1.66609e+07	1.76872e+07	1.7643e+07	1.74526e+07
	Glycogenesis	D-Glucose 6-phosphate → Glucose	G6PC_MOUSE	Glucose-6-phosphatase	G6pc	281226	253374	236772	289598	272084	298680
		D-Fructose 1,6-bisphosphate → D-Fructose 6-phosphate	F16P1_MOUSE	Fructose-1,6-bisphosphatase 1	Fbp1	2.66501e+07	3.02858e+07	3.54382e+07	2.26574e+07	2.2946e+07	2.86158e+07
		Oxaloacetic acid →Phosphoenolpyruvic acid	PCKGC_MOUSE	Phosphoenolpyruvate carboxykinase, cytosolic [GTP]	Pck1	1.00352e+07	8.17366e+06	9.1996e+06	1.36851e+07	1.21524e+07	1.14267e+07
	Glycogen synthesis/degradation	Glycogen → D-Glucose 1-phosphate	Q3TFQ8_MOUSE	Alpha-1,4 glucan phosphorylase	Pygb	63261.5	63888.6	83533.7	41213.8	46341.3	42361.3
			PYGL_MOUSE	Glycogen phosphorylase, liver form	Pygl	3.99995e+07	4.08547e+07	3.48175e+07	3.2814e+07	3.00771e+07	3.71786e+07
			A0A0G2JGI9_MOUSE	Amylo-1,6-glucosidase, 4-alpha-glucanotransferase	Agl	2.71647e+06	2.5386e+06	2.8636e+06	2.40058e+06	2.38813e+06	2.38679e+06
			F8VPN4_MOUSE	Amylo-1,6-glucosidase, 4-alpha-glucanotransferase	Agl	6.30537e+06	6.1507e+06	6.27907e+06	6.69373e+06	6.77627e+06	6.3327e+06
			F7CSZ6_MOUSE	Amylo-1,6-glucosidase, 4-alpha-glucanotransferase (Fragment)	Agl	46736.4	46511.5	24274.3	53320	60980.9	51352.6
		D-Glucose 1-phosphate ↔ D-Glucose 6-phosphate	PGM1_MOUSE	Phosphoglucomutase-1	Pgm1	2.43033e+06	3.51426e+06	1.95643e+06	3.17103e+06	3.26393e+06	3.23385e+06
			Q7TNU0_MOUSE	Pgm2 protein (Fragment)	Pgm2	8.88167e+06	1.07509e+07	8.45985e+06	6.74969e+06	6.71679e+06	6.89371e+06
			Q3U6X6_MOUSE	Uncharacterized protein	Pgm2	108822	107289	115605	120259	109895	119261
			A2CEK3_MOUSE	Phosphoglucomutase-2	Pgm2	688206	983544	802365	831358	731957	1.31646e+06
		D-Glucose 1-phosphate → Uridine 5'-diphosphate glucose	UGPA_MOUSE	UTP--glucose-1-phosphate uridylyltransferase	Ugp2	2.95004e+07	2.80003e+07	2.40746e+07	2.61326e+07	2.95259e+07	2.67167e+07
		Uridine 5'-diphosphate glucose → D-Glucose 1-phosphate	A0A0R4J1Q7_MOUSE	Ectonucleotide pyrophosphatase/phosphodiesterase 1, isoform CRA_a	Enpp1	29963.7	27380.7	37574.1	23834.8	26089.8	27042.9
			G3X9S2_MOUSE	Ectonucleotide pyrophosphatase/phosphodiesterase 1, isoform CRA_d	Enpp1	32488.2	30325.8	25749.6	43876.2	42773.5	35964.1
		Uridine 5'-diphosphate glucose ↔ Uridine 5'-diphosphate-alpha-D-galactose	GALE_MOUSE	UDP-glucose 4-epimerase	Gale	n.d.	n.d.	n.d.	n.d.	n.d.	n.d.
		Uridine 5'-diphosphate glucose → Glycogen	GYS2_MOUSE	Glycogen [starch] synthase, liver	Gys2	3.60703e+06	3.70751e+06	4.16441e+06	3.29905e+06	3.40504e+06	3.12965e+06
			V9GX26_MOUSE	Glycogenin (Fragment)	Gyg	268676	269792	292697	267569	307663	254790
			GLGB_MOUSE	1,4-alpha-glucan-branching enzyme	Gbe1	6.45627e+06	6.93056e+06	5.95847e+06	5.32877e+06	4.93682e+06	6.08831e+06
	Pentose phosphate pathway	D-Glucose 6-phosphate → D-Glucono-1,5-lactone-6P	G6PD2_MOUSE	Glucose-6-phosphate 1-dehydrogenase 2	G6pd2	n.d.	n.d.	n.d.	n.d.	n.d.	n.d.
		D-Glucono-1,5-lactone-6P → 6PG	D3Z4X1_MOUSE	6-phosphogluconolactonase	Pgls	145403	132807	182111	76037.8	77677	79142.8
			6PGL_MOUSE	6-phosphogluconolactonase	Pgls	1.50577e+06	1.3473e+06	1.67415e+06	1.22229e+06	1.19639e+06	1.20891e+06
		G6P → 6-Phosphogluconic acid	A2A7A7_MOUSE	GDH/6PGL endoplasmic bifunctional protein	H6pd	1.67548e+06	1.70774e+06	1.81858e+06	1.90639e+06	1.96582e+06	1.85498e+06
		6-Phosphogluconic acid ↔ Ru5P	Q91V28_MOUSE	6-phosphogluconate dehydrogenase, decarboxylating	Pgd	173822	177517	212542	99998.6	95143.7	120035
			Q3UAG2_MOUSE	6-phosphogluconate dehydrogenase, decarboxylating	Pgd	2.65585e+06	2.8497e+06	2.66514e+06	2.13963e+06	1.99246e+06	2.18665e+06
		D-Ribulose 5-phosphate↔ D-Ribose 5-phosphate	RPIA_MOUSE	Ribose-5-phosphate isomerase	Rpia	n.d.	n.d.	n.d.	n.d.	n.d.	n.d.
		D-Ribose 5-phosphate ↔ Phosphoribosyl diphosphate	Q3TI27_MOUSE	Uncharacterized protein	Prps1	173390	199586	226547	171050	146561	223557
			Q3UPD5_MOUSE	Uncharacterized protein	Prps1	85202.6	78088.9	92126	78506.3	84220.3	143309
			PRPS1_MOUSE	Ribose-phosphate pyrophosphokinase 1	Prps1	224868	224510	127981	293266	295752	279725
			PRPS2_MOUSE	Ribose-phosphate pyrophosphokinase 2	Prps2	664132	668084	621063	556572	532798	532643
			Q3UYQ0_MOUSE	Expressed sequence AU021838	Prps1l3	966399	940130	1.09524e+06	776922	798969	818856
		D-Ribulose 5-phosphate ↔ D-Xylulose 5-phosphate	A0A087WQM3_MOUSE	Ribulose-phosphate 3-epimerase	Rpe	21657.8	21747.8	29555.7	18935.7	19711.8	20423.9
			RPE_MOUSE	Ribulose-phosphate 3-epimerase	Rpe	58480.6	57941.9	67572.6	54718.8	62191.5	57024.7
		D-Ribose 5-phosphate + D-Xylulose 5-phosphate ↔ D-Sedoheputulose 7-phosphate + Glyceraldehyde 3-phosphate	A0A286YE28_MOUSE	Transketolase (Fragment)	Tkt	3.43515e+06	3.58768e+06	3.15079e+06	1.94646e+06	1.91922e+06	2.16663e+06
			TKT_MOUSE	Transketolase	Tkt	1.08121e+07	1.27299e+07	6.83135e+06	1.05424e+07	9.77449e+06	1.08689e+07
		D-Xylulose 5-phosphate + D-Erythrose 4-phosphate ↔ D-Fructose 6-phosphate + Glyceraldehyde 3-phosphate	A0A286YE28_MOUSE	Transketolase (Fragment)	Tkt	3.43515e+06	3.58768e+06	3.15079e+06	1.94646e+06	1.91922e+06	2.16663e+06
			TKT_MOUSE	Transketolase	Tkt	1.08121e+07	1.27299e+07	6.83135e+06	1.05424e+07	9.77449e+06	1.08689e+07
		D-Sedoheputulose 7-phosphate + Glyceraldehyde 3-phosphate ↔ D-Fructose 6-phosphate + D-Erythrose 4-phosphate	A0A1B0GR11_MOUSE	Transaldolase	Taldo1	5.41947e+06	5.49657e+06	4.02637e+06	4.97864e+06	4.72961e+06	4.96637e+06
